# Supplementary material for: Automated cell annotation in multi-cell images using an improved CRF_ID algorithm
Source: eLife. 2025 Jan 24;12:RP89050. doi: 10.7554/eLife.89050 (PMC11759411; doi:10.7554/eLife.89050)
Supplement: Figure 2—source data 1. [file elife-89050-fig2-data1.xlsx]

## Sheet: Sheet1
Figure 2- source data for 2b
worm		PCA axes				Corrected axes
		PA	LR	DV		PA	LR	DV
1		15.4382	5.65448	15.4175		2.9693	1.06173	3.02405
2		12.6483	1.89804	12.7287		4.69476	4.84346	4.92931
3		14.1508	3.086	14.1147		2.39602	4.45779	4.21413
4		15.8624	1.67335	15.7838		9.57954	2.98383	9.21564
5		13.9842	5.89217	13.8745		8.56446	6.51739	9.51521
6		22.8081	6.48718	22.2811		8.71185	3.73308	7.86918
7		15.4024	5.63293	15.8473		6.09802	0.86009	6.04328
8		21.7692	7.00298	20.9026		3.6251	3.40976	2.41251
9		14.5994	5.87489	14.8819		5.51472	2.41167	5.16471
10		9.91813	5.47634	11.0882		2.88924	1.25344	3.11393
11		17.5257	5.9364	18.2626		5.87285	5.05261	5.73621
12		12.6426	5.44965	13.1792		5.73058	5.84505	3.49006
13		13.7468	8.73593	16.1986		1.64315	1.23585	1.61941
14		13.278	1.57613	13.3692		9.01887	5.44937	9.88522
15		11.3039	3.79555	11.6221		8.96525	3.98574	8.13789
16		13.9194	2.41347	13.7138		10.7783	6.28738	9.08155
17		18.0813	4.68374	18.4706		7.76494	4.96818	8.66949
18		17.3018	9.22231	19.422		8.38457	5.30132	8.73738
19		17.7217	4.90067	18.2646		11.637	9.72953	11.4714
20		16.6948	2.98667	16.4893		7.60308	5.41863	5.72565
21		13.1576	1.15574	13.151		8.44497	4.87721	9.73141
22		17.0991	5.42612	17.6185		4.78337	9.36486	10.52
23		15.1994	3.54825	15.3365		9.13898	3.42841	8.81014
24		16.0726	3.16395	15.8763		7.55002	4.4213	6.17406
25		13.499	3.90932	13.8737		6.62574	8.24468	7.42316
26		14.9518	13.6289	10.9814		4.34188	2.9135	3.38526
27		17.8525	22.2685	18.3614		4.12421	2.30664	4.72592
28		53.1343	55.3557	40.1252		2.04881	5.07176	4.82428
29		12.9736	16.659	15.0715		7.43244	4.07154	8.20299
30		23.597	26.2426	20.632		7.19134	3.22951	7.87002
31		5.55906	11.242	9.338		4.74882	2.64376	5.001
32		9.02041	15.3862	12.763		10.0797	2.42175	10.151
33		15.082	12.5427	13.3879		5.14748	13.1991	14.0301
34		7.7216	14.5232	12.2105		9.08863	3.59338	9.70654
35		16.6074	14.8025	12.9861		5.82905	2.23967	5.62703
36		9.01298	14.4877	11.9642		11.2773	9.70314	14.2935
37		10.3785	16.3334	13.9213		8.44257	0.754962	8.46669
38		12.9568	13.1302	12.5637		2.87496	4.87662	5.65513
39		11.3065	18.2494	14.5704		8.20438	4.6203	9.36115
40		25.1393	30.5143	23.967		6.56786	4.37157	5.05696
41		4.35781	15.1658	11.3465		8.08077	1.27697	8.16971
42		2.30278	13.298	9.58027		1.34546	4.28524	4.20012
43		26.7409	25.4318	20.6794		4.79791	4.79056	0.368878
44		18.6798	25.4478	20.2739		4.22112	2.8446	4.66763
45		22.4098	27.4305	21.6437		7.04575	4.75014	8.33212
46		25.9617	30.8399	24.2193		4.72211	17.4923	17.9226
