# Supplementary material for: Automated cell annotation in multi-cell images using an improved CRF_ID algorithm
Source: eLife. 2025 Jan 24;12:RP89050. doi: 10.7554/eLife.89050 (PMC11759411; doi:10.7554/eLife.89050)
Supplement: Figure 2—source data 2. [file elife-89050-fig2-data2.xlsx]

## Sheet: Sheet1
Figure 2- source data for 2c
worm		pca axes		corrected axes		manual axes
1		0.56		0.72		0.72
2		0.866667		0.9		0.9
3		0.583333		0.75		0.708333
4		0.861111		0.944444		0.888889
5		0.727273		0.818182		0.878788
6		0.75		0.821429		0.75
7		0.586207		0.62069		0.689655
8		0.482759		0.793103		0.758621
9		0.785714		0.857143		0.75
10		0.909091		0.969697		0.969697
11		0.354839		0.83871		0.580645
12		0.72		0.88		0.92
13		0.56		0.72		0.72
14		0.888889		0.851852		0.851852
16		0.818182		1		1
17		0.903226		0.870968		0.903226
18		0.956522		0.956522		0.956522
19		0.75		0.958333		0.958333
20		0.911765		0.941176		0.911765
21		0.807692		0.884615		0.807692
23		0.782609		0.913043		0.913043
25		0.666667		0.791667		0.791667
26		0.72		0.72		0.84
27		0.851852		0.962963		1
28		0.806452		0.967742		0.870968
