# Supplementary material for: Automated cell annotation in multi-cell images using an improved CRF_ID algorithm
Source: eLife. 2025 Jan 24;12:RP89050. doi: 10.7554/eLife.89050 (PMC11759411; doi:10.7554/eLife.89050)
Supplement: Figure 3—source data 1. [file elife-89050-fig3-data1.xlsx]

## Sheet: Sheet1
Figure 3- source data for 3c
Atlas	openworm		NeuroPAL		1 worm		3 worm		5 worm		10 worm		25 worm
	0.2		0.36		0.44		0.48		0.52		0.72		0.72
	0.433333		0.566667		0.666667		0.833333		0.833333		0.866667		0.9
	0.375		0.541667		0.708333		0.708333		0.75		0.791667		0.75
	0.388889		0.694444		0.833333		0.861111		0.944444		0.944444		0.944444
	0.272727		0.515152		0.69697		0.848485		0.727273		0.848485		0.818182
	0.259259		0.392857		0.678571		0.75		0.75		0.892857		0.821429
	0.206897		0.758621		0.517241		0.655172		0.758621		0.655172		0.62069
	0.214286		0.448276		0.586207		0.724138		0.724138		0.724138		0.793103
	0.392857		0.714286		0.678571		0.857143		0.892857		0.857143		0.857143
	0.40625		0.666667		0.848485		0.878788		0.878788		1		0.969697
	0.322581		0.419355		0.322581		0.774194		0.83871		0.645161		0.83871
	0.375		0.4		0.48		0.76		0.92		0.92		0.88
	0.32		0.64		0.76		0.64		0.68		0.68		0.72
	0.346154		0.444444		0.851852		0.851852		0.814815		0.851852		0.851852
	0.333333		0.56		0.76		0.6		0.92		0.84		0.72
	0.454545		0.727273				0.909091		0.954545		0.954545		1
	0.4		0.774194		0.83871		0.83871		0.903226		0.870968		0.870968
	0.227273		0.434783		0.652174		0.652174		0.652174		0.913043		0.956522
	0.391304		0.458333		0.833333		0.875		0.958333		0.916667		0.958333
	0.484848		0.882353		0.852941		0.823529		0.794118		0.882353		0.941176
	0.36		0.692308		0.692308		0.807692		0.807692		0.846154		0.884615
	0.565217		0.478261		0.869565		0.652174		0.826087		0.956522		0.913043
	0.416667		0.541667		0.791667		0.583333		0.708333		0.708333		0.791667
	0.48		0.48		0.68		0.72		0.76		0.72		0.72
	0.384615		0.666667		0.925926		0.925926		0.925926		0.925926		0.962963
	0.433333		0.580645		0.870968		0.83871		0.83871		0.870968		0.967742
