# Supplementary material for: Automated cell annotation in multi-cell images using an improved CRF_ID algorithm
Source: eLife. 2025 Jan 24;12:RP89050. doi: 10.7554/eLife.89050 (PMC11759411; doi:10.7554/eLife.89050)
Supplement: Figure 3—source data 2. [file elife-89050-fig3-data2.xlsx]

## Sheet: Sheet1
Figure 3- source data for 3d
	angle relationship difference from glr-1 25
	Openworm	NeuroPAL	1	3	5	10
	0	0	0	0	0	0
	70.0735	70.0594	70.0594	70.0594	70.0594	70.0594
	61.2062	60.6882	60.6882	60.6882	60.6882	60.6882
	37.5929	37.2649	37.2649	37.2649	37.2649	37.2649
	30.0071	29.3126	29.3126	29.3126	29.3126	29.3126
	27.4468	26.8809	26.8809	26.8809	26.8809	26.8809
	35.1528	34.4271	34.4271	34.4271	34.4271	34.4271
	37.5939	37.1161	37.1161	37.1161	37.1161	37.1161
	0.7062	8.53774e-07	8.53774e-07	8.53774e-07	8.53774e-07	8.53774e-07
	29.4809	29.0366	29.0366	29.0366	29.0366	29.0366
	48.0321	47.4216	47.4216	47.4216	47.4216	47.4216
	31.0053	30.5126	30.5126	30.5126	30.5126	30.5126
	4.31993	5.12035	5.12035	5.12035	5.12035	5.12035
	57.4567	56.7894	56.7894	56.7894	56.7894	56.7894
	0.72925	0	0	0	0	0
	28.8135	28.0508	28.0508	28.0508	28.0508	28.0508
	25.8756	25.3985	25.3985	25.3985	25.3985	25.3985
	5.96851	5.22327	5.22327	5.22327	5.22327	5.22327
	9.79395	9.60101	9.60101	9.60101	9.60101	9.60101
	47.3394	46.7532	46.7532	46.7532	46.7532	46.7532
	24.587	24.3065	24.3065	24.3065	24.3065	24.3065
	42.5842	42.0071	42.0071	42.0071	42.0071	42.0071
	14.6671	14.4536	14.4536	14.4536	14.4536	14.4536
	38.7578	38.1213	38.1213	38.1213	38.1213	38.1213
	26.9273	26.3381	26.3381	26.3381	26.3381	26.3381
	25.9374	25.2614	25.2614	25.2614	25.2614	25.2614
	19.7078	19.1039	19.1039	19.1039	19.1039	19.1039
	20.8131	20.0583	20.0583	20.0583	20.0583	20.0583
	19.0384	18.3156	18.3156	18.3156	18.3156	18.3156
	24.0352	23.3281	23.3281	23.3281	23.3281	23.3281
	67.7445	67.9535	67.9535	67.9535	67.9535	67.9535
	45.3062	45.5221	45.5221	45.5221	45.5221	45.5221
	38.4352	37.664	37.664	37.664	37.664	37.664
	34.5853	33.9369	33.9369	33.9369	33.9369	33.9369
	23.2329	22.4365	22.4365	22.4365	22.4365	22.4365
	21.3892	20.6691	20.6691	20.6691	20.6691	20.6691
	25.1073	24.3427	24.3427	24.3427	24.3427	24.3427
	21.1873	20.4503	20.4503	20.4503	20.4503	20.4503
	70.0735	70.0594	70.0594	70.0594	70.0594	70.0594
	0	0	0	0	0	0
	22.8461	22.4968	22.4968	19.4047	19.4047	19.4047
	23.3075	22.572	22.572	39.4311	15.0115	15.0115
	15.2752	14.9172	14.9172	14.7754	6.08745	6.08745
	16.7359	16.1315	16.1315	17.5157	6.21462	6.21462
	13.6126	13.6005	13.6005	13.6005	5.85452	5.85452
	8.24234	7.66209	7.66209	7.66209	9.25587	9.25587
	9.14372	9.47465	9.47465	22.7469	5.57532	5.57532
	12.5282	12.3234	12.3234	41.3172	16.6793	16.6793
	19.2878	18.7825	18.7825	18.5477	8.37733	8.37733
	20.2734	19.5704	19.5704	24.5546	8.90646	8.90646
	8.22005	8.8403	8.8403	9.23591	1.50136	1.50136
	7.46354	6.78943	6.78943	17.8358	12.8592	12.8592
	26.9292	26.8955	26.8955	0	0	0
	12.3401	11.8687	11.8687	15.2942	7.41002	7.41002
	19.3612	19.0196	19.0196	14.212	5.62571	5.62571
	2.19877	2.9967	2.9967	7.08555	8.63053	8.63053
	1.42844	1.46971	1.46971	10.0889	0.80344	0.80344
	6.4511	6.6874	6.6874	13.327	5.37004	5.37004
	9.15301	9.16178	9.16178	49.6391	15.975	15.975
	24.2854	23.9202	23.9202	23.2027	7.21501	7.21501
	31.7276	31.2312	31.2312	38.7023	15.1266	15.1266
	15.4452	14.886	14.886	20.886	7.69078	7.69078
	18.5274	17.7478	17.7478	25.6871	10.3491	10.3491
	10.5431	10.2707	10.2707	11.0833	5.5324	5.5324
	8.71558	7.99782	7.99782	16.2812	5.91911	5.91911
	10.6899	10.1965	10.1965	7.79638	4.54492	4.54492
	13.2507	12.4547	12.4547	11.6087	4.25977	4.25977
	20.0789	19.447	19.447	17.4876	3.52002	3.52002
	22.3254	21.9994	21.9994	32.7736	9.63359	9.63359
	52.4455	51.8331	51.8331	71.787	17.2955	17.2955
	17.5252	17.0206	17.0206	15.6358	7.0257	7.0257
	20.4638	19.7077	19.7077	11.4529	4.27959	4.27959
	14.5697	13.8307	13.8307	6.58395	3.97297	3.97297
	16.5716	15.8098	15.8098	10.1009	4.5874	4.5874
	15.7414	15.013	15.013	5.92827	3.77892	3.77892
	16.4995	15.7071	15.7071	8.79138	4.66686	4.66686
	61.2062	60.6882	60.6882	60.6882	60.6882	60.6882
	22.8461	22.4968	22.4968	19.4047	19.4047	19.4047
	0	0	0	0	0	0
	7.11805	36.1608	7.11805	7.79103	7.79103	6.80731
	27.0593	11.4354	27.4323	5.44299	5.44299	8.04901
	2.73088	37.8186	3.09354	7.44973	7.44973	2.00531
	15.2954	14.833	14.833	14.833	14.833	11.98
	11.2491	11.0575	11.0575	11.0575	11.0575	7.60343
	36.9062	24.8141	36.227	27.7815	27.7815	5.99836
	21.0662	51.7279	20.8042	9.93148	9.93148	0.84143
	17.2762	15.1703	17.6769	4.67863	4.67863	2.39759
	4.95278	49.4751	5.08866	9.25938	9.25938	3.13272
	1.79068	9.61885	2.4343	0.61633	0.61633	0.35232
	21.4823	24.9506	20.7277	42.8918	42.8918	9.14498
	21.4449	21.1306	21.1306	16.0688	16.0688	12.2546
	5.43092	7.79117	5.92295	13.6239	13.6239	4.37376
	7.99738	8.14977	8.14977	3.25423	3.25423	3.24349
	8.31422	7.56218	7.56218	1.57761	1.57761	2.37727
	9.11015	7.97015	8.42014	3.36914	3.36914	3.44282
	45.5399	14.8486	44.7486	26.8868	26.8868	6.78722
	20.3419	39.2663	20.034	4.03998	4.03998	1.05947
	82.4093	31.7339	82.847	15.1323	15.1323	4.83946
	15.8686	43.7448	16.0077	6.81967	6.81967	4.34097
	27.2226	19.0954	27.7039	7.1145	7.1145	13.4208
	9.32256	37.4224	9.51027	8.43236	8.43236	3.7998
	21.6801	5.66	22.327	5.47801	5.47801	7.45525
	5.89466	36.246	6.34169	6.29004	6.29004	1.07383
	9.85255	6.65741	10.1495	5.57916	5.57916	3.57919
	7.03634	34.1409	7.03582	5.39724	5.39724	4.5939
	35.3802	34.6979	34.6979	0.84334	0.84334	0.99598
	34.2227	34.634	34.634	15.0238	15.0238	4.06069
	25.9637	26.0799	26.0799	11.6488	11.6488	5.12866
	14.8933	14.6606	14.6606	8.38345	8.38345	4.86568
	8.8155	8.33661	8.33661	4.40883	4.40883	5.27447
	13.9651	12.7273	13.2331	7.63292	7.63292	5.24186
	10.6423	23.2164	9.94396	6.509	6.509	5.07603
	9.9947	9.70093	9.30873	3.33017	3.33017	3.62836
	8.7906	24.229	8.19654	2.89998	2.89998	3.78858
	37.5929	37.2649	37.2649	37.2649	37.2649	37.2649
	23.3075	22.572	22.572	39.4311	15.0115	15.0115
	7.11805	36.1608	7.11805	7.79103	7.79103	6.80731
	0	0	0	0	0	0
	6.98002	31.1943	7.0737	4.03858	3.90553	2.61712
	21.9665	6.10184	21.9406	7.10525	0.67317	1.65245
	8.42978	8.74167	8.74167	8.74167	12.2066	2.59939
	13.1995	13.0925	13.0925	13.0925	26.3452	2.40564
	13.4251	63.7263	13.5003	21.7106	11.8916	3.15874
	29.0995	44.6101	28.6872	23.1301	13.2571	5.913
	7.36135	33.419	7.22748	1.57539	8.64491	4.43448
	36.2879	19.2843	36.2062	14.4496	2.26754	4.89979
	1.88498	2.67994	2.67994	2.22811	1.85499	1.60301
	15.8097	42.5203	15.4116	25.1049	12.8222	1.18942
	35.9558	49.6854	35.5769	12.0541	12.0541	9.28102
	2.37689	2.63632	2.63632	2.6821	5.27838	1.31556
	31.2094	31.2881	31.2881	4.28027	7.28208	1.78079
	5.79849	5.05029	5.05029	2.21355	3.21005	3.75566
	6.84493	11.9103	6.32076	2.13824	1.00203	1.89899
	10.0191	60.9751	9.86793	5.84451	2.74913	3.21283
	33.479	31.4158	32.8473	12.8618	10.4037	6.79762
	2.79698	50.3794	2.94077	7.62359	3.39874	4.04021
	108.285	65.3455	108.38	17.8782	4.95112	2.02675
	2.58028	36.8899	2.43242	5.93	7.22905	2.64954
	21.6088	29.0135	21.5126	5.81485	14.0207	8.36525
	8.25285	28.829	8.57808	5.14537	3.11221	2.9035
	10.5441	8.57394	10.9326	3.72547	2.29262	1.76437
	3.56349	31.044	3.70976	7.1072	3.01473	1.98489
	6.30035	11.2656	5.70537	3.20577	2.24542	1.64095
	24.9266	24.2257	24.2257	6.37976	1.3408	1.217
	12.8801	13.0376	13.0376	0.93143	4.21789	3.69858
	53.7609	54.0638	54.0638	8.34353	4.71992	3.52147
	5.92417	5.55114	5.55114	3.70157	3.12326	2.09621
	17.2837	10.2884	16.7466	5.37021	8.8289	1.27318
	10.9992	24.8166	10.2918	3.74999	4.73287	3.20705
	15.5568	12.1539	15.0001	2.70573	3.29996	1.53154
	8.49638	28.5872	7.8108	7.73145	1.71316	1.56148
	13.294	10.8309	12.7636	7.28556	0.6112	0.21629
	30.0071	29.3126	29.3126	29.3126	29.3126	29.3126
	15.2752	14.9172	14.9172	14.7754	6.08745	6.08745
	27.0593	11.4354	27.4323	5.44299	5.44299	8.04901
	6.98002	31.1943	7.0737	4.03858	3.90553	2.61712
	0	0	0	0	0	0
	4.13166	1.89259	1.17771	2.5694	1.31975	0.80442
	27.9622	27.9333	14.9312	11.9103	7.13372	8.15324
	5.84263	5.60458	2.03383	3.13301	4.17405	2.59634
	25.0889	14.6472	2.71588	4.10914	3.3195	3.39608
	11.8328	39.1808	11.5532	6.79453	3.74729	0.88451
	33.6246	27.4593	26.8546	13.5648	14.7008	3.74111
	10.448	13.8658	4.92096	4.00643	2.59139	2.04543
	1.22349	10.589	1.98978	0.65288	1.43828	0.27821
	30.4889	22.5178	16.8165	16.2877	10.6029	4.33936
	18.7107	44.0887	4.49702	1.51085	0.95987	1.4543
	23.2821	19.2577	23.0667	13.4824	13.0599	4.57662
	4.65207	4.54766	4.54766	2.28133	4.04268	1.88698
	5.37887	4.60407	5.24021	2.27362	1.6499	1.70166
	7.66764	5.17808	6.47686	2.46129	1.66808	1.39239
	21.1448	11.4867	8.20119	4.56626	0.69079	1.85144
	11.7367	32.903	4.76507	4.37571	3.23589	0.56016
	7.77429	16.5096	11.6439	5.58233	3.41104	2.36137
	22.6084	28.742	5.29285	4.65007	3.20932	2.45462
	42.8907	45.4011	10.311	6.04065	2.05726	2.57091
	12.5932	19.5745	5.08686	1.42551	2.15501	1.49265
	54.9739	29.2903	25.9545	4.89511	2.58723	6.44274
	2.26456	21.8872	0.76301	1.98146	1.93592	2.20269
	7.37277	21.2926	6.97218	6.34683	3.06473	2.58192
	7.28139	47.0213	5.44527	4.04322	1.21773	1.13583
	25.685	24.9655	24.9655	3.51394	0.37751	1.46697
	5.53779	6.29409	11.0769	3.57678	1.94078	2.41804
	23.106	23.2181	7.73623	3.59115	2.96712	2.48005
	21.7491	21.087	27.214	8.29184	4.17093	1.29312
	14.3649	14.1759	4.98128	4.62423	4.46322	3.16432
	20.6264	21.0509	19.8284	2.58862	1.73401	0.97345
	14.6487	37.374	14.077	0.25741	2.14898	0.49856
	17.2848	15.1357	16.511	4.26059	0.22881	1.79662
	11.7229	36.2015	11.2412	2.71513	1.56098	0.21715
	27.4468	26.8809	26.8809	26.8809	26.8809	26.8809
	16.7359	16.1315	16.1315	17.5157	6.21462	6.21462
	2.73088	37.8186	3.09354	7.44973	7.44973	2.00531
	21.9665	6.10184	21.9406	7.10525	0.67317	1.65245
	4.13166	1.89259	1.17771	2.5694	1.31975	0.80442
	0	0	0	0	0	0
	3.76868	3.7572	1.20193	2.21025	3.86533	3.85153
	29.4536	29.2526	7.35509	7.15222	7.33533	6.17488
	8.25174	44.5247	7.00678	9.93227	2.55317	1.77476
	30.3216	15.9796	4.79074	4.52157	2.0101	1.5692
	2.87325	20.1871	3.67996	5.75238	2.38744	0.59703
	10.746	13.4605	20.4425	8.68952	4.06917	3.4467
	4.07614	9.89815	4.20136	1.32081	1.65075	1.00733
	11.1846	37.3485	9.57359	8.22992	5.1693	0.9687
	58.1869	23.2451	6.40917	2.9825	1.71607	2.74883
	0.82457	46.3508	0.72014	5.57501	3.37148	2.4931
	44.6207	44.5385	44.5385	7.52494	9.82021	2.85049
	7.8629	7.2693	6.4523	3.78845	2.58543	3.0601
	5.01583	9.2647	7.51992	3.40905	1.96443	1.92055
	6.47442	39.7787	8.7901	5.33368	0.96335	2.07423
	23.2617	10.6862	9.18884	7.23983	4.70446	1.64697
	13.4459	34.0947	6.06357	5.65112	1.27633	1.2777
	13.7947	18.4799	8.9101	6.34098	2.3634	2.32875
	6.22099	23.2182	4.91282	6.14328	1.34117	0.2962
	29.021	30.3905	14.6788	11.4433	7.32089	8.66384
	10.2901	13.0364	1.75585	2.75275	1.1867	0.18288
	51.7151	18.2001	7.39999	5.54627	4.78496	8.08067
	6.27102	43.955	6.29705	4.11042	3.50076	0.97318
	10.8242	15.3524	4.65392	4.33053	0.78529	1.14635
	23.9614	23.2799	23.2799	3.79317	1.18793	1.34857
	17.131	17.1726	7.79033	4.82329	0.71176	1.21394
	4.26425	4.77822	9.021	5.25692	2.50044	1.43423
	6.81579	6.74933	5.14203	2.55251	0.26599	0.49507
	28.0264	13.3142	7.39562	1.91	4.63533	4.9935
	12.8776	34.9827	12.3052	4.87198	5.3063	2.3443
	18.896	17.6805	18.1984	3.17449	4.00589	1.64747
	10.8537	38.146	10.3575	2.92047	1.10242	0.95334
	14.2446	15.1438	13.4936	4.70008	2.35086	0.7378
	35.1528	34.4271	34.4271	34.4271	34.4271	34.4271
	13.6126	13.6005	13.6005	13.6005	5.85452	5.85452
	15.2954	14.833	14.833	14.833	14.833	11.98
	8.42978	8.74167	8.74167	8.74167	12.2066	2.59939
	27.9622	27.9333	14.9312	11.9103	7.13372	8.15324
	3.76868	3.7572	1.20193	2.21025	3.86533	3.85153
	0	0	0	0	0	0
	7.05788	7.05788	5.72296	5.89431	6.08719	1.17693
	38.004	37.2044	28.0752	21.9465	4.22199	9.09802
	10.1672	10.0475	9.41648	2.82068	2.86948	3.31729
	16.6993	16.4809	8.69315	6.68188	10.2679	9.71843
	7.82647	8.04048	6.75932	5.65797	3.65155	4.27771
	4.71986	4.84776	4.84776	7.12286	6.12163	1.84209
	39.5037	38.9533	29.8671	29.8671	20.6263	8.57609
	29.5482	29.3684	3.98099	3.98099	5.3534	2.12539
	10.6845	10.4183	10.4183	10.4183	9.51023	8.9122
	3.45371	3.74186	3.74186	1.83116	7.04926	2.98527
	7.92692	7.39221	6.9202	5.73497	3.33882	2.3734
	4.25206	3.62046	8.56809	6.26087	3.6999	2.14821
	1.8406	2.28742	24.8436	17.0323	4.29499	6.09989
	8.09842	8.14474	5.72975	5.99226	2.46988	2.47483
	35.6577	35.9532	9.84149	10.5186	6.38128	6.18971
	12.0569	12.4305	10.4037	10.2561	3.86066	2.40605
	22.3576	22.6445	16.3635	12.1742	8.19784	10.5578
	10.2721	10.5017	3.23097	3.94233	3.6851	3.19767
	14.1295	14.1071	5.04051	6.81232	3.71363	5.57981
	1.76601	1.62304	1.38032	1.29727	4.47141	4.38768
	11.8845	11.6493	11.6493	8.78075	5.7367	4.63801
	9.85517	9.7601	2.29812	2.05348	3.10983	2.2979
	38.4377	37.7789	37.7789	37.7789	0.64028	2.63329
	27.4485	27.965	9.28744	10.5569	5.01912	3.43413
	16.467	16.8876	8.14831	9.23327	3.85666	1.55963
	26.0696	25.6713	4.52888	2.85635	6.23227	6.47237
	12.005	11.7677	3.46101	2.71662	4.94091	2.18456
	15.1324	14.5463	14.5463	6.1726	4.38772	4.9803
	9.95819	9.41115	9.41115	3.58315	4.00455	3.85608
	11.852	11.2975	11.2975	5.80685	2.52219	1.72294
	7.27292	6.61695	6.61695	4.13173	3.57763	3.22558
	37.5939	37.1161	37.1161	37.1161	37.1161	37.1161
	8.24234	7.66209	7.66209	7.66209	9.25587	9.25587
	11.2491	11.0575	11.0575	11.0575	11.0575	7.60343
	13.1995	13.0925	13.0925	13.0925	26.3452	2.40564
	5.84263	5.60458	2.03383	3.13301	4.17405	2.59634
	29.4536	29.2526	7.35509	7.15222	7.33533	6.17488
	7.05788	7.05788	5.72296	5.89431	6.08719	1.17693
	0	0	0	0	0	0
	10.5452	10.4684	11.0169	8.4016	5.91196	1.60114
	48.5555	47.758	31.7698	14.4619	11.8705	5.13046
	9.26472	8.94347	7.3361	6.73516	6.46991	3.07716
	32.5688	32.4605	6.90513	3.48282	3.65321	5.93994
	1.25175	1.56713	1.56713	4.08623	5.23618	1.04288
	16.0418	15.9069	7.34127	7.34127	13.6827	2.55682
	64.7957	64.1821	6.87038	6.87038	6.87038	6.79732
	0.83829	1.02059	1.02059	1.02059	9.66195	1.15714
	53.7252	53.8796	53.8796	5.55748	5.87353	3.97505
	6.75586	5.96723	8.60659	5.18871	4.69855	4.31954
	7.85454	7.37568	10.2316	4.91752	3.19354	2.42467
	5.68951	5.50838	12.05	6.61096	4.83199	1.39722
	16.3811	15.6003	29.5274	17.0417	6.57762	6.2405
	1.17457	0.82301	8.73802	5.26443	4.32681	4.19087
	41.4443	41.5125	9.81501	2.84962	2.56103	3.79144
	4.62953	4.49905	5.46525	3.30231	4.63106	2.62874
	23.3465	23.3182	12.3033	7.74355	6.763	6.69069
	6.61336	6.49599	3.02254	3.29223	4.43045	2.98392
	17.349	17.1194	5.17297	6.66212	7.66252	4.30517
	3.39774	2.91272	2.91272	6.71068	9.08031	2.83406
	12.2591	11.9243	1.30242	4.50837	6.07795	3.30788
	27.8756	27.2053	27.2053	27.2053	9.81259	2.47549
	4.03874	4.46719	10.8392	3.82917	2.46207	3.10093
	29.4278	29.6273	13.0201	4.1676	1.9795	0.87997
	5.76486	5.36396	2.11165	4.56034	5.37952	2.20811
	28.8813	28.5749	6.96253	4.08101	5.47762	3.44528
	10.8862	10.3958	10.3958	7.23027	9.60345	3.44428
	20.2248	19.8742	19.8742	7.01618	10.0124	2.86766
	10.6311	10.0555	10.0555	4.03692	6.94884	2.80646
	17.3658	16.9211	16.9211	7.92221	7.40495	2.92483
	0.7062	8.53774e-07	8.53774e-07	8.53774e-07	8.53774e-07	8.53774e-07
	9.14372	9.47465	9.47465	22.7469	5.57532	5.57532
	36.9062	24.8141	36.227	27.7815	27.7815	5.99836
	13.4251	63.7263	13.5003	21.7106	11.8916	3.15874
	25.0889	14.6472	2.71588	4.10914	3.3195	3.39608
	8.25174	44.5247	7.00678	9.93227	2.55317	1.77476
	38.004	37.2044	28.0752	21.9465	4.22199	9.09802
	10.5452	10.4684	11.0169	8.4016	5.91196	1.60114
	0	0	0	0	0	0
	8.51569	32.9282	6.17012	0.874	2.29999	1.60634
	26.3581	25.0329	9.29087	11.3456	3.88599	2.79607
	9.63708	54.5423	8.03682	12.1587	4.01641	2.15737
	6.64763	13.8192	7.14809	0.80933	2.59892	1.33531
	29.6898	36.4817	28.1309	37.0679	22.7685	4.57038
	27.8477	27.6291	6.47198	14.2271	9.64223	4.81231
	20.7221	14.5038	20.1577	13.5689	3.73962	5.30418
	7.39674	7.02014	7.02014	10.5064	4.11358	1.32198
	7.63572	7.30123	5.89316	2.19669	2.18443	2.44053
	2.50782	3.96831	7.34552	2.03271	2.3609	2.21643
	32.1715	45.5389	25.2584	34.3982	8.68778	6.07481
	9.81422	44.382	5.41131	7.5883	3.92376	1.56202
	40.0405	40.9639	12.2599	17.5916	5.07941	4.57396
	7.58363	48.2142	14.4997	16.6214	6.25387	2.726
	21.5251	27.7934	4.67027	10.0069	3.42765	4.65484
	11.7865	48.4287	8.10198	12.8437	3.99776	1.30335
	15.1077	9.01203	3.31854	2.14539	0.834	1.40143
	7.00063	41.5636	5.80039	8.33887	1.49095	2.52392
	14.6062	9.48269	14.0411	0.57536	1.80536	0.94655
	11.4697	35.5597	5.47005	7.19045	1.31187	0.83759
	38.0973	37.5012	37.5012	6.70939	2.16168	2.56491
	37.1081	37.528	7.22391	17.7233	8.4276	3.47197
	14.8447	15.2985	10.7253	16.3585	5.81253	3.16699
	25.2249	24.6221	10.2887	7.38549	1.07428	3.67028
	15.1518	14.7246	8.93191	9.79711	2.81441	1.67006
	18.9954	14.0816	18.3191	3.87223	3.52579	1.50256
	12.5063	28.2459	11.85	4.80793	1.00695	1.72554
	17.0507	9.79511	16.3342	2.29903	0.29527	0.25991
	11.8532	27.7827	11.18	4.99379	2.65934	1.21607
	29.4809	29.0366	29.0366	29.0366	29.0366	29.0366
	12.5282	12.3234	12.3234	41.3172	16.6793	16.6793
	21.0662	51.7279	20.8042	9.93148	9.93148	0.84143
	29.0995	44.6101	28.6872	23.1301	13.2571	5.913
	11.8328	39.1808	11.5532	6.79453	3.74729	0.88451
	30.3216	15.9796	4.79074	4.52157	2.0101	1.5692
	10.1672	10.0475	9.41648	2.82068	2.86948	3.31729
	48.5555	47.758	31.7698	14.4619	11.8705	5.13046
	8.51569	32.9282	6.17012	0.874	2.29999	1.60634
	0	0	0	0	0	0
	17.7841	46.0812	8.34592	5.35382	2.62389	1.15542
	34.9269	27.3395	16.9838	11.7579	3.93626	4.8287
	2.84444	3.5995	3.5995	1.1103	0.82372	1.56215
	11.499	11.122	17.688	24.2634	15.6466	1.68169
	40.3734	4.5894	21.2149	29.5806	23.1292	7.05613
	8.59432	8.12384	8.12384	11.2454	7.53073	2.56585
	40.7776	40.5997	40.5997	4.11202	5.03524	3.98348
	3.71611	2.92824	7.29732	4.23083	2.96451	4.08413
	6.95936	15.3795	8.89999	2.99053	1.64716	2.77202
	9.7694	52.8025	9.1611	7.29915	3.85566	2.7663
	19.8435	69.2648	90.9703	40.9465	26.7774	2.67341
	10.9874	48.6907	11.4354	7.10406	2.47135	1.80583
	48.0875	42.9289	24.32	16.8755	5.50727	4.72977
	12.7966	45.5689	11.1174	6.03078	3.33611	0.77547
	25.8835	27.2766	8.63225	6.2166	0.20916	5.73988
	10.4262	36.5527	7.87963	5.44594	3.19447	0.77675
	20.549	13.1776	3.23389	3.08294	2.48134	2.89898
	9.27476	33.9685	8.68733	3.58716	5.33679	0.81368
	16.1511	13.1317	4.15963	1.79371	1.94226	1.15406
	24.3591	23.7133	23.7133	11.7839	5.58949	1.91322
	7.96612	7.99713	12.4383	9.50069	5.02715	2.58407
	40.1052	40.1795	25.553	18.6324	5.65862	3.18834
	13.1861	12.6974	10.6451	6.07265	3.24909	1.41717
	28.6156	20.3274	6.73972	4.9297	1.4566	3.85597
	14.3537	29.5481	13.7065	3.23575	5.97704	1.74349
	21.2257	16.5209	20.6592	2.97303	6.63378	1.22048
	15.6486	31.7165	14.9858	3.91127	4.44705	1.48975
	20.5734	13.5307	19.9326	0.87684	4.21868	1.56255
	48.0321	47.4216	47.4216	47.4216	47.4216	47.4216
	19.2878	18.7825	18.7825	18.5477	8.37733	8.37733
	17.2762	15.1703	17.6769	4.67863	4.67863	2.39759
	7.36135	33.419	7.22748	1.57539	8.64491	4.43448
	33.6246	27.4593	26.8546	13.5648	14.7008	3.74111
	2.87325	20.1871	3.67996	5.75238	2.38744	0.59703
	16.6993	16.4809	8.69315	6.68188	10.2679	9.71843
	9.26472	8.94347	7.3361	6.73516	6.46991	3.07716
	26.3581	25.0329	9.29087	11.3456	3.88599	2.79607
	17.7841	46.0812	8.34592	5.35382	2.62389	1.15542
	0	0	0	0	0	0
	9.87171	13.9465	8.65049	9.1335	5.54639	1.01761
	2.92648	11.9209	3.10339	0.89374	2.46663	0.40328
	28.3471	22.4422	22.5111	30.8988	26.7317	11.4412
	29.8562	49.8419	3.43574	4.90564	4.79593	2.28291
	7.66322	10.5075	8.18738	4.34949	6.20437	1.53632
	3.43886	3.66645	3.66645	2.25581	2.47246	1.43565
	8.16645	7.47537	6.071	3.26687	2.6834	2.16767
	6.88233	6.30238	6.92818	3.00922	2.46018	1.51031
	20.8636	16.2629	14.0985	9.66098	3.99247	2.43761
	15.1631	38.4778	6.1619	5.68853	5.05314	0.98403
	42.1007	15.3354	8.99644	7.29502	6.5267	2.99948
	22.401	34.1414	12.9597	10.9269	7.65896	3.2157
	99.1149	54.1796	54.0257	36.3995	35.3406	15.0011
	13.17	13.1244	4.72336	7.65961	4.21374	2.34476
	24.3578	3.41388	3.58529	5.66667	6.55481	1.42085
	5.13059	28.1176	2.84568	4.25946	0.98703	1.10999
	8.36312	12.2207	8.64952	5.81855	5.13813	1.8721
	7.25459	38.3146	3.96947	4.22823	0.6207	1.31135
	31.1336	30.443	30.443	3.40359	1.28178	1.52949
	18.145	18.3065	9.04701	6.1848	6.0325	2.7678
	23.1926	23.2634	7.61268	7.53947	5.52424	3.94475
	16.2315	15.7853	16.2183	6.11677	5.38518	2.21887
	10.3567	9.98771	6.19539	5.42167	2.5842	2.55243
	14.7356	13.1718	14.0049	2.71506	3.50054	1.79597
	10.6784	29.0409	10.0203	0.73921	1.07391	0.63184
	10.472	10.3576	9.70779	5.18046	3.35099	0.16627
	7.45687	28.0899	6.85641	3.4335	1.93094	0.56741
	31.0053	30.5126	30.5126	30.5126	30.5126	30.5126
	20.2734	19.5704	19.5704	24.5546	8.90646	8.90646
	4.95278	49.4751	5.08866	9.25938	9.25938	3.13272
	36.2879	19.2843	36.2062	14.4496	2.26754	4.89979
	10.448	13.8658	4.92096	4.00643	2.59139	2.04543
	10.746	13.4605	20.4425	8.68952	4.06917	3.4467
	7.82647	8.04048	6.75932	5.65797	3.65155	4.27771
	32.5688	32.4605	6.90513	3.48282	3.65321	5.93994
	9.63708	54.5423	8.03682	12.1587	4.01641	2.15737
	34.9269	27.3395	16.9838	11.7579	3.93626	4.8287
	9.87171	13.9465	8.65049	9.1335	5.54639	1.01761
	0	0	0	0	0	0
	3.95871	8.86398	4.10684	1.06876	1.33699	1.30863
	7.5679	46.5603	7.31076	7.47937	8.01205	1.92019
	55.038	46.1629	8.51709	9.17361	3.18503	2.14442
	5.65237	40.5572	5.76447	6.60609	6.68184	1.95581
	26.3426	26.4766	26.4766	6.10447	8.90328	1.8112
	7.15443	6.52491	5.08189	3.57882	2.82285	3.52792
	5.11101	10.1721	6.00319	2.65445	1.69215	2.32636
	5.80964	50.3311	6.50412	5.87339	2.51619	2.36299
	28.0097	16.9908	1.62601	4.83263	3.22259	1.52954
	7.65471	47.7448	3.78463	6.21896	2.4332	0.60202
	35.7644	29.855	8.41962	4.77464	2.26633	0.98155
	0.72369	19.9566	5.07557	6.63708	2.63847	1.82982
	8.45011	87.8782	35.32	25.2805	19.3483	4.14633
	13.923	15.7485	5.10925	3.25202	2.31149	1.64929
	14.3148	2.51639	9.41441	3.80912	1.18474	1.8398
	9.32578	34.5158	9.35518	2.77971	4.29102	1.44496
	8.11483	11.7965	6.96134	2.52488	1.80737	0.65664
	24.9694	24.2866	24.2866	3.38892	2.49199	0.73068
	15.8216	15.8704	4.42616	4.03116	0.85787	0.96523
	11.1917	11.473	8.49654	4.00905	1.91705	0.36842
	10.284	10.2099	9.21137	4.98317	2.37151	1.4378
	14.5269	8.12206	9.60837	2.14575	4.95622	1.00243
	12.8293	26.4933	12.1945	4.30613	6.41985	3.03767
	15.3626	12.6423	14.6344	1.83209	4.08754	1.44886
	12.2089	30.4003	11.6843	2.22497	2.37757	1.37562
	12.6724	12.1104	11.8928	3.45697	3.29874	1.05975
	4.31993	5.12035	5.12035	5.12035	5.12035	5.12035
	8.22005	8.8403	8.8403	9.23591	1.50136	1.50136
	1.79068	9.61885	2.4343	0.61633	0.61633	0.35232
	1.88498	2.67994	2.67994	2.22811	1.85499	1.60301
	1.22349	10.589	1.98978	0.65288	1.43828	0.27821
	4.07614	9.89815	4.20136	1.32081	1.65075	1.00733
	4.71986	4.84776	4.84776	7.12286	6.12163	1.84209
	1.25175	1.56713	1.56713	4.08623	5.23618	1.04288
	6.64763	13.8192	7.14809	0.80933	2.59892	1.33531
	2.84444	3.5995	3.5995	1.1103	0.82372	1.56215
	2.92648	11.9209	3.10339	0.89374	2.46663	0.40328
	3.95871	8.86398	4.10684	1.06876	1.33699	1.30863
	0	0	0	0	0	0
	4.39978	12.6561	4.59138	7.89061	4.07518	1.74877
	8.95619	9.28211	9.28211	2.5887	2.5887	1.13496
	1.58883	8.63042	2.29739	3.4402	1.74621	0.6631
	7.43194	7.65161	7.65161	1.00501	2.17809	1.09914
	57.0018	56.2683	56.2683	2.27939	2.31196	1.67375
	45.6207	46.2061	46.2061	4.30904	3.27005	2.33208
	7.3675	16.7827	7.65583	2.94326	1.78847	2.41571
	3.25031	10.9185	4.01011	1.16113	1.49805	1.39599
	1.52429	11.4499	2.25655	0.23398	1.27545	0.5935
	8.16927	11.684	8.35618	0.6123	1.73252	1.02164
	2.35791	10.6057	2.76819	0.5165	1.71134	0.28305
	3.19062	3.60195	3.60195	1.58521	2.49587	1.5995
	2.71202	10.3262	3.31125	0.84189	1.09485	0.44454
	2.90697	8.80936	3.28068	1.25968	1.53958	0.57693
	1.35553	9.87905	1.90159	0.4717	1.12581	0.39132
	2.22816	7.88219	2.19435	0.92381	1.59426	0.70701
	43.5323	44.2422	44.2422	5.95775	1.14463	2.83804
	1.79326	2.5735	2.5735	0.70577	1.00554	0.17597
	7.19795	7.4494	7.4494	0.94668	1.57235	0.4748
	1.70267	1.02789	1.02789	1.4734	2.0581	0.74196
	4.23384	3.98843	3.98843	0.23502	1.62599	0.40968
	2.91118	9.55989	2.12261	0.58678	1.99303	0.79174
	4.88055	8.19696	4.55316	0.60209	1.65189	0.67237
	3.16413	10.3051	2.42525	0.24639	1.60801	0.88758
	4.59992	4.19585	4.19585	0.85095	1.80109	0.91896
	57.4567	56.7894	56.7894	56.7894	56.7894	56.7894
	7.46354	6.78943	6.78943	17.8358	12.8592	12.8592
	21.4823	24.9506	20.7277	42.8918	42.8918	9.14498
	15.8097	42.5203	15.4116	25.1049	12.8222	1.18942
	30.4889	22.5178	16.8165	16.2877	10.6029	4.33936
	11.1846	37.3485	9.57359	8.22992	5.1693	0.9687
	39.5037	38.9533	29.8671	29.8671	20.6263	8.57609
	16.0418	15.9069	7.34127	7.34127	13.6827	2.55682
	29.6898	36.4817	28.1309	37.0679	22.7685	4.57038
	11.499	11.122	17.688	24.2634	15.6466	1.68169
	28.3471	22.4422	22.5111	30.8988	26.7317	11.4412
	7.5679	46.5603	7.31076	7.47937	8.01205	1.92019
	4.39978	12.6561	4.59138	7.89061	4.07518	1.74877
	0	0	0	0	0	0
	7.74735	7.72817	9.80528	12.3986	10.2069	5.0759
	30.824	34.1021	30.3375	37.3423	29.0312	10.7541
	16.2702	16.0772	16.0772	12.76	13.8436	2.96331
	7.25076	6.79213	5.15788	4.85824	3.30433	1.81696
	3.22753	19.9426	7.50102	6.62234	4.39223	1.7307
	11.0393	26.9806	19.1308	18.0653	15.6692	6.46809
	8.77738	28.2141	8.83414	16.6224	12.5731	1.95188
	24.7483	21.6698	10.0449	17.3086	13.3293	2.99153
	6.62347	23.7044	3.95949	10.4114	9.63013	1.21829
	17.4111	28.0617	17.2503	26.6056	15.861	5.04197
	7.61828	41.2983	9.56508	11.3339	8.02628	3.08165
	30.2645	16.6136	11.4802	14.9841	10.9829	5.98667
	13.349	36.2835	8.53878	6.14764	4.44538	0.2455
	20.2094	11.544	19.7622	10.2394	10.7604	4.24631
	10.2722	29.265	6.71155	2.18836	1.20615	2.04555
	36.582	35.8938	35.8938	11.5036	7.32062	2.8766
	18.7934	18.8588	10.4195	14.0015	10.2795	2.87812
	5.38721	5.84224	5.49533	10.3711	10.6435	0.72757
	34.9126	34.3961	17.0163	22.3811	15.7639	6.44562
	14.1385	13.7549	7.67948	6.86631	9.89438	3.11758
	15.1605	3.26985	14.6192	8.94411	9.47949	4.12487
	7.67447	21.6616	6.95649	3.70208	4.48654	1.76233
	17.0151	4.87072	16.3295	8.1132	7.37779	3.9066
	11.7507	17.587	11.023	4.3464	4.66961	3.18531
	0.72925	0	0	0	0	0
	26.9292	26.8955	26.8955	0	0	0
	21.4449	21.1306	21.1306	16.0688	16.0688	12.2546
	35.9558	49.6854	35.5769	12.0541	12.0541	9.28102
	18.7107	44.0887	4.49702	1.51085	0.95987	1.4543
	58.1869	23.2451	6.40917	2.9825	1.71607	2.74883
	29.5482	29.3684	3.98099	3.98099	5.3534	2.12539
	64.7957	64.1821	6.87038	6.87038	6.87038	6.79732
	27.8477	27.6291	6.47198	14.2271	9.64223	4.81231
	40.3734	4.5894	21.2149	29.5806	23.1292	7.05613
	29.8562	49.8419	3.43574	4.90564	4.79593	2.28291
	55.038	46.1629	8.51709	9.17361	3.18503	2.14442
	8.95619	9.28211	9.28211	2.5887	2.5887	1.13496
	7.74735	7.72817	9.80528	12.3986	10.2069	5.0759
	0	0	0	0	0	0
	11.4294	11.0069	11.0069	7.77249	7.77249	8.1212
	69.8887	69.7402	69.7402	24.2816	24.2816	16.8595
	7.05249	6.70243	5.57602	4.58321	3.45734	2.60011
	12.3518	12.3228	5.85669	3.79835	2.76634	1.16643
	24.5842	24.4271	4.95235	3.53019	3.88339	0.66706
	31.8034	37.0862	6.56599	14.937	18.4747	8.12043
	16.1087	47.0269	2.68994	3.72113	3.72665	1.33332
	53.4493	45.5211	9.56899	5.89391	2.45673	1.4877
	19.9564	47.3331	1.46276	3.8939	3.58776	1.37297
	48.8301	36.4431	1.76001	3.43659	2.75399	1.76244
	18.1957	40.4119	1.39642	1.12825	1.88265	0.44543
	50.3381	13.9973	7.16948	5.07531	3.08642	3.29306
	11.8628	35.4074	11.2886	5.52285	5.52285	2.28304
	29.6333	10.9891	5.45588	4.67405	3.63779	3.22136
	25.9269	25.2211	25.2211	5.95994	5.33962	3.96124
	14.8054	14.7538	3.12069	2.26218	2.06066	0.51727
	43.1945	43.1962	6.557	4.60052	4.22377	1.77842
	20.5921	20.1706	6.1857	3.70848	1.11136	0.37175
	65.5401	25.9211	7.46278	4.09682	7.72647	5.11465
	15.9705	29.7514	15.4523	4.61707	4.61707	1.6989
	30.9844	14.7508	30.6211	3.06064	3.06064	2.43193
	15.9999	15.4122	15.4122	8.63008	8.63008	4.55958
	26.8393	15.1701	26.4614	11.1016	11.1016	7.28915
	28.8135	28.0508	28.0508	28.0508	28.0508	28.0508
	12.3401	11.8687	11.8687	15.2942	7.41002	7.41002
	5.43092	7.79117	5.92295	13.6239	13.6239	4.37376
	2.37689	2.63632	2.63632	2.6821	5.27838	1.31556
	23.2821	19.2577	23.0667	13.4824	13.0599	4.57662
	0.82457	46.3508	0.72014	5.57501	3.37148	2.4931
	10.6845	10.4183	10.4183	10.4183	9.51023	8.9122
	0.83829	1.02059	1.02059	1.02059	9.66195	1.15714
	20.7221	14.5038	20.1577	13.5689	3.73962	5.30418
	8.59432	8.12384	8.12384	11.2454	7.53073	2.56585
	7.66322	10.5075	8.18738	4.34949	6.20437	1.53632
	5.65237	40.5572	5.76447	6.60609	6.68184	1.95581
	1.58883	8.63042	2.29739	3.4402	1.74621	0.6631
	30.824	34.1021	30.3375	37.3423	29.0312	10.7541
	11.4294	11.0069	11.0069	7.77249	7.77249	8.1212
	0	0	0	0	0	0
	1.12003	1.0829	1.0829	7.35835	5.93958	3.52498
	6.49898	5.79176	5.79176	4.05574	2.83005	2.41193
	5.95979	5.58359	5.58359	3.45648	2.11111	1.84241
	12.3643	8.42488	11.8773	8.42501	2.75649	5.73809
	6.66635	35.9143	6.16385	9.36517	6.55116	1.87087
	12.9181	12.4129	13.1691	6.29503	4.01944	4.17619
	17.9118	30.9887	18.0256	4.72898	5.56341	2.07435
	13.3436	12.8491	14.1053	15.6663	7.34823	5.3515
	6.44969	6.66435	6.66435	2.24688	2.45385	3.41933
	30.8692	39.223	30.1896	23.3778	17.4067	9.41245
	7.75638	38.6669	7.67703	4.20364	2.74392	4.51557
	6.22898	7.13547	5.62112	12.7862	7.40062	8.05167
	3.30213	42.909	3.00936	6.54057	4.83559	3.84298
	27.6172	26.9242	26.9242	3.33918	2.03805	2.1173
	7.88966	8.3362	8.3362	3.96271	4.80655	2.96247
	16.8129	16.9863	16.9863	3.74516	5.28255	2.39307
	65.3245	64.6492	64.6492	19.8393	13.3235	15.9028
	12.5451	12.462	12.462	6.15021	6.09844	3.10171
	19.8189	19.6786	19.075	4.39754	4.77437	7.34464
	11.2606	36.2751	10.6828	1.62666	3.13975	5.16731
	13.388	12.784	12.5877	10.9178	3.41075	3.12807
	9.93849	9.39587	9.39587	6.51969	3.17372	1.96968
	25.8756	25.3985	25.3985	25.3985	25.3985	25.3985
	19.3612	19.0196	19.0196	14.212	5.62571	5.62571
	7.99738	8.14977	8.14977	3.25423	3.25423	3.24349
	31.2094	31.2881	31.2881	4.28027	7.28208	1.78079
	4.65207	4.54766	4.54766	2.28133	4.04268	1.88698
	44.6207	44.5385	44.5385	7.52494	9.82021	2.85049
	3.45371	3.74186	3.74186	1.83116	7.04926	2.98527
	53.7252	53.8796	53.8796	5.55748	5.87353	3.97505
	7.39674	7.02014	7.02014	10.5064	4.11358	1.32198
	40.7776	40.5997	40.5997	4.11202	5.03524	3.98348
	3.43886	3.66645	3.66645	2.25581	2.47246	1.43565
	26.3426	26.4766	26.4766	6.10447	8.90328	1.8112
	7.43194	7.65161	7.65161	1.00501	2.17809	1.09914
	16.2702	16.0772	16.0772	12.76	13.8436	2.96331
	69.8887	69.7402	69.7402	24.2816	24.2816	16.8595
	1.12003	1.0829	1.0829	7.35835	5.93958	3.52498
	0	0	0	0	0	0
	10.4474	10.1747	10.1747	1.38233	2.26172	1.67145
	5.03735	4.68073	4.68073	1.26069	2.32977	1.50005
	10.0876	9.93713	9.93713	2.586	2.59134	3.85973
	34.0462	33.9112	33.9112	6.40267	4.74439	2.5649
	18.1043	18.1914	18.1914	2.704	1.98053	2.21546
	6.34908	7.05597	7.05597	3.28736	3.81057	0.47664
	8.42395	8.57107	8.57107	3.87426	2.23617	0.75494
	29.5409	29.7164	29.7164	0.69354	1.67054	3.45898
	9.6362	9.54125	9.54125	1.27129	3.9446	1.45526
	82.9912	82.729	82.729	1.34891	2.87658	8.34758
	10.597	10.5144	10.5144	0.75264	2.52873	1.10859
	29.7821	29.5728	29.5728	2.42289	0.58662	1.36562
	25.7912	25.1951	25.1951	2.58568	1.92179	1.53026
	20.8506	20.9712	20.9712	2.84161	2.84429	1.71243
	10.3107	10.828	10.828	1.37062	3.61574	1.82743
	10.3755	10.3173	10.3173	4.30777	4.32774	3.19056
	106.889	106.536	106.536	7.64265	5.57412	15.2989
	12.1842	11.6627	11.6627	3.02609	5.10821	2.53512
	14.0759	13.2965	13.2965	1.02829	3.27651	0.76447
	12.2447	11.8135	11.8135	3.56959	2.93997	0.94961
	14.6107	13.9738	13.9738	3.3112	1.93876	3.1954
	5.96851	5.22327	5.22327	5.22327	5.22327	5.22327
	2.19877	2.9967	2.9967	7.08555	8.63053	8.63053
	8.31422	7.56218	7.56218	1.57761	1.57761	2.37727
	5.79849	5.05029	5.05029	2.21355	3.21005	3.75566
	5.37887	4.60407	5.24021	2.27362	1.6499	1.70166
	7.8629	7.2693	6.4523	3.78845	2.58543	3.0601
	7.92692	7.39221	6.9202	5.73497	3.33882	2.3734
	6.75586	5.96723	8.60659	5.18871	4.69855	4.31954
	7.63572	7.30123	5.89316	2.19669	2.18443	2.44053
	3.71611	2.92824	7.29732	4.23083	2.96451	4.08413
	8.16645	7.47537	6.071	3.26687	2.6834	2.16767
	7.15443	6.52491	5.08189	3.57882	2.82285	3.52792
	57.0018	56.2683	56.2683	2.27939	2.31196	1.67375
	7.25076	6.79213	5.15788	4.85824	3.30433	1.81696
	7.05249	6.70243	5.57602	4.58321	3.45734	2.60011
	6.49898	5.79176	5.79176	4.05574	2.83005	2.41193
	10.4474	10.1747	10.1747	1.38233	2.26172	1.67145
	0	0	0	0	0	0
	29.5866	29.4218	3.0537	3.3984	0.48326	1.93896
	9.06201	8.59124	4.83585	2.76695	2.66886	3.09938
	4.47845	3.70452	5.84647	3.4968	2.7405	3.70117
	6.04174	5.24141	4.66076	2.15188	1.86243	1.64176
	10.3588	9.93957	4.59802	2.75995	2.23973	2.54096
	6.86303	6.16213	5.19034	2.37256	1.92581	1.91959
	7.13329	6.48304	6.01505	3.97653	3.07559	3.21872
	5.18491	4.50485	5.49942	2.40787	1.96702	1.97913
	6.34074	5.71696	5.99065	3.59091	2.4582	2.52658
	6.25177	5.52656	5.52656	0.93643	2.43161	2.10034
	7.03783	6.36455	5.16673	2.5553	1.66067	1.90179
	29.1136	29.8033	29.8033	4.8361	2.18072	1.73092
	5.72018	4.93363	4.06679	1.71054	1.5053	1.45509
	9.621	9.1797	4.89246	3.21752	2.6244	2.90394
	7.13339	6.36788	6.59254	3.1271	1.93079	1.84059
	8.76648	8.08463	6.55699	3.361	2.63883	2.95856
	8.29442	7.52572	7.52572	1.16841	2.49318	2.19316
	9.19461	8.54475	8.54475	2.10105	2.97125	2.40357
	7.97903	7.25788	7.25788	0.64965	1.26484	1.16664
	9.13491	8.49569	8.49569	1.69151	2.45039	2.21747
	9.79395	9.60101	9.60101	9.60101	9.60101	9.60101
	1.42844	1.46971	1.46971	10.0889	0.80344	0.80344
	9.11015	7.97015	8.42014	3.36914	3.36914	3.44282
	6.84493	11.9103	6.32076	2.13824	1.00203	1.89899
	7.66764	5.17808	6.47686	2.46129	1.66808	1.39239
	5.01583	9.2647	7.51992	3.40905	1.96443	1.92055
	4.25206	3.62046	8.56809	6.26087	3.6999	2.14821
	7.85454	7.37568	10.2316	4.91752	3.19354	2.42467
	2.50782	3.96831	7.34552	2.03271	2.3609	2.21643
	6.95936	15.3795	8.89999	2.99053	1.64716	2.77202
	6.88233	6.30238	6.92818	3.00922	2.46018	1.51031
	5.11101	10.1721	6.00319	2.65445	1.69215	2.32636
	45.6207	46.2061	46.2061	4.30904	3.27005	2.33208
	3.22753	19.9426	7.50102	6.62234	4.39223	1.7307
	12.3518	12.3228	5.85669	3.79835	2.76634	1.16643
	5.95979	5.58359	5.58359	3.45648	2.11111	1.84241
	5.03735	4.68073	4.68073	1.26069	2.32977	1.50005
	29.5866	29.4218	3.0537	3.3984	0.48326	1.93896
	0	0	0	0	0	0
	4.04928	3.1128	6.15362	3.01144	2.80179	2.80236
	6.8501	18.3977	7.45909	2.02034	1.46058	2.20147
	10.0164	15.1482	5.88138	2.09471	1.85511	1.31268
	6.60257	18.2545	5.5527	1.91148	1.44208	1.47301
	6.50907	7.72674	6.36121	2.27839	1.7375	1.3741
	5.0697	11.9834	6.7201	3.21786	2.34167	2.20333
	5.64562	5.57055	6.52699	2.44792	1.93335	1.66685
	3.87605	9.06133	6.85511	3.04375	1.7232	1.37524
	5.96606	7.90655	5.42797	0.27552	2.08202	1.52228
	5.6451	8.5859	6.38432	2.60073	1.68103	1.61111
	54.1648	54.7209	54.7209	8.17392	2.32124	1.47379
	9.93072	9.5073	5.43148	1.92263	1.6194	1.20024
	6.0919	5.3531	5.85358	2.19971	1.73652	1.5866
	7.53047	6.98244	7.78942	3.01648	1.72902	1.26051
	5.9389	5.13908	7.0826	2.03243	1.46028	1.44563
	7.60699	7.71133	6.90336	0.36047	2.05193	1.47078
	6.65507	6.42755	5.86722	0.76568	1.78508	1.13336
	8.25775	9.89215	7.53331	0.34257	1.92585	1.77914
	6.93081	6.81621	6.12894	1.23384	1.93621	1.58964
	47.3394	46.7532	46.7532	46.7532	46.7532	46.7532
	6.4511	6.6874	6.6874	13.327	5.37004	5.37004
	45.5399	14.8486	44.7486	26.8868	26.8868	6.78722
	10.0191	60.9751	9.86793	5.84451	2.74913	3.21283
	21.1448	11.4867	8.20119	4.56626	0.69079	1.85144
	6.47442	39.7787	8.7901	5.33368	0.96335	2.07423
	1.8406	2.28742	24.8436	17.0323	4.29499	6.09989
	5.68951	5.50838	12.05	6.61096	4.83199	1.39722
	32.1715	45.5389	25.2584	34.3982	8.68778	6.07481
	9.7694	52.8025	9.1611	7.29915	3.85566	2.7663
	20.8636	16.2629	14.0985	9.66098	3.99247	2.43761
	5.80964	50.3311	6.50412	5.87339	2.51619	2.36299
	7.3675	16.7827	7.65583	2.94326	1.78847	2.41571
	11.0393	26.9806	19.1308	18.0653	15.6692	6.46809
	24.5842	24.4271	4.95235	3.53019	3.88339	0.66706
	12.3643	8.42488	11.8773	8.42501	2.75649	5.73809
	10.0876	9.93713	9.93713	2.586	2.59134	3.85973
	9.06201	8.59124	4.83585	2.76695	2.66886	3.09938
	4.04928	3.1128	6.15362	3.01144	2.80179	2.80236
	0	0	0	0	0	0
	7.99155	34.2331	4.26635	3.16485	3.3768	3.23758
	39.9424	35.4319	9.31886	8.02602	1.90952	6.24489
	0.2054	46.2773	11.4567	6.75219	3.27446	4.39322
	16.9986	20.2807	8.01498	6.38761	1.09489	3.21253
	6.70641	43.4299	8.50182	6.63515	2.074	2.0393
	10.988	7.5578	8.83004	3.89723	0.81663	1.57746
	4.58846	37.1186	7.4032	4.59824	0.6117	2.67365
	10.8275	8.2162	10.3211	1.28958	0.49391	0.85903
	8.20386	31.4426	7.0349	4.43842	0.80922	0.90853
	41.3121	40.7099	40.7099	10.8576	1.24365	3.68949
	40.1978	40.467	10.792	5.00248	4.69299	7.89705
	9.6286	10.0065	10.7034	6.37498	3.04397	4.33025
	17.7614	17.2284	14.1655	6.92051	0.97791	2.5906
	10.0588	9.51863	8.76438	4.2749	2.81247	2.79067
	15.9468	12.0893	15.2401	1.80152	1.98784	0.77504
	11.5343	25.3002	10.8209	2.50304	0.53529	1.36655
	15.6498	10.2703	14.904	2.17617	0.71629	0.15838
	11.4099	23.8316	10.7067	3.31235	2.14709	0.86857
	24.587	24.3065	24.3065	24.3065	24.3065	24.3065
	9.15301	9.16178	9.16178	49.6391	15.975	15.975
	20.3419	39.2663	20.034	4.03998	4.03998	1.05947
	33.479	31.4158	32.8473	12.8618	10.4037	6.79762
	11.7367	32.903	4.76507	4.37571	3.23589	0.56016
	23.2617	10.6862	9.18884	7.23983	4.70446	1.64697
	8.09842	8.14474	5.72975	5.99226	2.46988	2.47483
	16.3811	15.6003	29.5274	17.0417	6.57762	6.2405
	9.81422	44.382	5.41131	7.5883	3.92376	1.56202
	19.8435	69.2648	90.9703	40.9465	26.7774	2.67341
	15.1631	38.4778	6.1619	5.68853	5.05314	0.98403
	28.0097	16.9908	1.62601	4.83263	3.22259	1.52954
	3.25031	10.9185	4.01011	1.16113	1.49805	1.39599
	8.77738	28.2141	8.83414	16.6224	12.5731	1.95188
	31.8034	37.0862	6.56599	14.937	18.4747	8.12043
	6.66635	35.9143	6.16385	9.36517	6.55116	1.87087
	34.0462	33.9112	33.9112	6.40267	4.74439	2.5649
	4.47845	3.70452	5.84647	3.4968	2.7405	3.70117
	6.8501	18.3977	7.45909	2.02034	1.46058	2.20147
	7.99155	34.2331	4.26635	3.16485	3.3768	3.23758
	0	0	0	0	0	0
	12.2389	44.7132	2.52917	2.83603	3.25616	1.15705
	49.1544	39.7408	5.59997	5.671	1.87662	3.2185
	10.168	38.6703	3.81334	3.9056	3.57734	0.64549
	20.9014	21.0808	7.96152	5.53881	7.17018	4.0427
	9.4792	30.521	4.5109	3.773	3.21301	0.65605
	13.4489	9.14159	7.21601	6.03457	3.71783	1.40438
	7.64057	29.8682	7.09101	3.32149	5.74883	1.04507
	12.3928	10.7189	5.06048	3.60671	2.80434	0.90591
	23.908	23.2734	23.2734	9.01572	6.66714	1.38365
	6.03544	5.80947	3.85764	3.21223	3.06938	1.8992
	45.8891	45.8631	11.1914	8.99017	1.99352	4.60467
	10.8372	10.363	7.28251	5.03095	2.92322	0.62434
	20.8654	14.6681	7.68923	4.07918	3.20315	1.69467
	13.17	25.443	12.4653	4.1618	6.40362	2.31662
	17.908	12.6686	17.2993	4.41825	5.97731	1.96803
	13.9012	27.0662	13.2014	2.94186	4.30908	1.42312
	17.7874	11.8322	17.1153	2.04709	5.07657	1.87524
	42.5842	42.0071	42.0071	42.0071	42.0071	42.0071
	24.2854	23.9202	23.9202	23.2027	7.21501	7.21501
	82.4093	31.7339	82.847	15.1323	15.1323	4.83946
	2.79698	50.3794	2.94077	7.62359	3.39874	4.04021
	7.77429	16.5096	11.6439	5.58233	3.41104	2.36137
	13.4459	34.0947	6.06357	5.65112	1.27633	1.2777
	35.6577	35.9532	9.84149	10.5186	6.38128	6.18971
	1.17457	0.82301	8.73802	5.26443	4.32681	4.19087
	40.0405	40.9639	12.2599	17.5916	5.07941	4.57396
	10.9874	48.6907	11.4354	7.10406	2.47135	1.80583
	42.1007	15.3354	8.99644	7.29502	6.5267	2.99948
	7.65471	47.7448	3.78463	6.21896	2.4332	0.60202
	1.52429	11.4499	2.25655	0.23398	1.27545	0.5935
	24.7483	21.6698	10.0449	17.3086	13.3293	2.99153
	16.1087	47.0269	2.68994	3.72113	3.72665	1.33332
	12.9181	12.4129	13.1691	6.29503	4.01944	4.17619
	18.1043	18.1914	18.1914	2.704	1.98053	2.21546
	6.04174	5.24141	4.66076	2.15188	1.86243	1.64176
	10.0164	15.1482	5.88138	2.09471	1.85511	1.31268
	39.9424	35.4319	9.31886	8.02602	1.90952	6.24489
	12.2389	44.7132	2.52917	2.83603	3.25616	1.15705
	0	0	0	0	0	0
	7.7651	9.74712	14.6147	10.6828	5.21592	5.64926
	30.5675	10.3801	14.0813	3.25074	3.9262	3.06761
	6.8862	33.7403	3.90732	6.56822	2.66858	5.0247
	17.4767	11.3876	7.06689	3.66673	2.90534	2.56556
	14.1261	29.8466	4.13529	4.06509	0.27544	1.03921
	7.0515	10.717	7.16399	1.80435	2.00777	2.59882
	9.52092	26.3032	5.08045	3.32406	0.74916	2.04303
	25.8987	25.1475	25.1475	1.74834	0.24968	1.21912
	8.8393	8.99672	9.97363	3.97463	3.45431	3.21635
	26.7684	26.7855	6.53915	7.3765	3.77267	3.70381
	8.01333	7.82186	11.4616	4.81968	1.47321	1.49151
	14.5449	20.2765	5.76864	3.09508	2.36406	3.09295
	13.9345	9.71004	13.1703	1.75145	2.74632	2.6961
	15.6116	19.3655	15.1	2.05683	0.89425	1.41051
	14.4648	10.2761	13.7917	1.00079	1.67494	2.60567
	17.2303	19.788	16.8512	1.24839	1.54143	2.2996
	14.6671	14.4536	14.4536	14.4536	14.4536	14.4536
	31.7276	31.2312	31.2312	38.7023	15.1266	15.1266
	15.8686	43.7448	16.0077	6.81967	6.81967	4.34097
	108.285	65.3455	108.38	17.8782	4.95112	2.02675
	22.6084	28.742	5.29285	4.65007	3.20932	2.45462
	13.7947	18.4799	8.9101	6.34098	2.3634	2.32875
	12.0569	12.4305	10.4037	10.2561	3.86066	2.40605
	41.4443	41.5125	9.81501	2.84962	2.56103	3.79144
	7.58363	48.2142	14.4997	16.6214	6.25387	2.726
	48.0875	42.9289	24.32	16.8755	5.50727	4.72977
	22.401	34.1414	12.9597	10.9269	7.65896	3.2157
	35.7644	29.855	8.41962	4.77464	2.26633	0.98155
	8.16927	11.684	8.35618	0.6123	1.73252	1.02164
	6.62347	23.7044	3.95949	10.4114	9.63013	1.21829
	53.4493	45.5211	9.56899	5.89391	2.45673	1.4877
	17.9118	30.9887	18.0256	4.72898	5.56341	2.07435
	6.34908	7.05597	7.05597	3.28736	3.81057	0.47664
	10.3588	9.93957	4.59802	2.75995	2.23973	2.54096
	6.60257	18.2545	5.5527	1.91148	1.44208	1.47301
	0.2054	46.2773	11.4567	6.75219	3.27446	4.39322
	49.1544	39.7408	5.59997	5.671	1.87662	3.2185
	7.7651	9.74712	14.6147	10.6828	5.21592	5.64926
	0	0	0	0	0	0
	15.5672	33.8405	7.02656	8.30293	4.37481	2.91091
	39.3719	14.1496	5.09281	8.9475	6.96235	5.76475
	22.5236	24.0733	6.50481	3.73465	3.06963	2.33067
	21.2537	15.288	5.42791	3.99528	1.01507	0.80454
	18.3776	23.4536	18.4155	1.32609	3.66054	2.24625
	16.7034	11.5365	5.98686	2.87844	1.60539	1.78711
	24.7922	24.1578	24.1578	2.54903	1.95024	1.97745
	18.4858	18.4878	10.0456	7.09551	1.89204	2.18009
	16.9426	17.0708	8.27405	2.18582	1.76757	2.6043
	19.7782	19.773	8.58518	4.94053	2.15673	0.98713
	15.5887	10.5034	3.31137	1.07165	3.47693	1.9088
	15.8193	18.604	15.3186	1.88435	3.85892	2.45282
	12.5465	9.59367	11.7761	1.85397	2.28606	1.20954
	17.5921	21.011	17.2002	0.49352	2.24381	2.15951
	13.1511	8.11946	12.4659	1.60313	2.09508	1.60993
	38.7578	38.1213	38.1213	38.1213	38.1213	38.1213
	15.4452	14.886	14.886	20.886	7.69078	7.69078
	27.2226	19.0954	27.7039	7.1145	7.1145	13.4208
	2.58028	36.8899	2.43242	5.93	7.22905	2.64954
	42.8907	45.4011	10.311	6.04065	2.05726	2.57091
	6.22099	23.2182	4.91282	6.14328	1.34117	0.2962
	22.3576	22.6445	16.3635	12.1742	8.19784	10.5578
	4.62953	4.49905	5.46525	3.30231	4.63106	2.62874
	21.5251	27.7934	4.67027	10.0069	3.42765	4.65484
	12.7966	45.5689	11.1174	6.03078	3.33611	0.77547
	99.1149	54.1796	54.0257	36.3995	35.3406	15.0011
	0.72369	19.9566	5.07557	6.63708	2.63847	1.82982
	2.35791	10.6057	2.76819	0.5165	1.71134	0.28305
	17.4111	28.0617	17.2503	26.6056	15.861	5.04197
	19.9564	47.3331	1.46276	3.8939	3.58776	1.37297
	13.3436	12.8491	14.1053	15.6663	7.34823	5.3515
	8.42395	8.57107	8.57107	3.87426	2.23617	0.75494
	6.86303	6.16213	5.19034	2.37256	1.92581	1.91959
	6.50907	7.72674	6.36121	2.27839	1.7375	1.3741
	16.9986	20.2807	8.01498	6.38761	1.09489	3.21253
	10.168	38.6703	3.81334	3.9056	3.57734	0.64549
	30.5675	10.3801	14.0813	3.25074	3.9262	3.06761
	15.5672	33.8405	7.02656	8.30293	4.37481	2.91091
	0	0	0	0	0	0
	1.18596	7.85012	0.49598	5.18364	1.08852	1.62918
	31.998	19.5877	10.4912	3.41025	2.5883	3.43028
	11.0304	26.3511	3.72798	4.23166	0.92901	1.70936
	6.9855	10.2555	7.31775	3.16802	1.52563	2.85662
	4.64374	34.0861	6.53371	4.45065	0.76535	1.6275
	27.6046	26.9117	26.9117	2.6101	0.4863	1.23481
	12.7915	12.7755	11.8529	2.53936	1.91119	2.75729
	18.3859	18.4084	5.97524	4.5872	3.05386	2.69352
	9.89532	9.93051	19.4352	7.57204	1.76463	1.9247
	9.68	9.47862	6.61379	4.53124	3.46899	2.97036
	16.2272	11.4866	15.4481	2.28463	2.79538	2.01965
	12.859	26.0174	12.2285	1.72757	0.75191	0.50274
	15.0423	10.8215	14.2424	2.10883	0.67593	2.43676
	13.2355	26.1878	12.7447	1.82287	1.55741	1.31283
	26.9273	26.3381	26.3381	26.3381	26.3381	26.3381
	18.5274	17.7478	17.7478	25.6871	10.3491	10.3491
	9.32256	37.4224	9.51027	8.43236	8.43236	3.7998
	21.6088	29.0135	21.5126	5.81485	14.0207	8.36525
	12.5932	19.5745	5.08686	1.42551	2.15501	1.49265
	29.021	30.3905	14.6788	11.4433	7.32089	8.66384
	10.2721	10.5017	3.23097	3.94233	3.6851	3.19767
	23.3465	23.3182	12.3033	7.74355	6.763	6.69069
	11.7865	48.4287	8.10198	12.8437	3.99776	1.30335
	25.8835	27.2766	8.63225	6.2166	0.20916	5.73988
	13.17	13.1244	4.72336	7.65961	4.21374	2.34476
	8.45011	87.8782	35.32	25.2805	19.3483	4.14633
	3.19062	3.60195	3.60195	1.58521	2.49587	1.5995
	7.61828	41.2983	9.56508	11.3339	8.02628	3.08165
	48.8301	36.4431	1.76001	3.43659	2.75399	1.76244
	6.44969	6.66435	6.66435	2.24688	2.45385	3.41933
	29.5409	29.7164	29.7164	0.69354	1.67054	3.45898
	7.13329	6.48304	6.01505	3.97653	3.07559	3.21872
	5.0697	11.9834	6.7201	3.21786	2.34167	2.20333
	6.70641	43.4299	8.50182	6.63515	2.074	2.0393
	20.9014	21.0808	7.96152	5.53881	7.17018	4.0427
	6.8862	33.7403	3.90732	6.56822	2.66858	5.0247
	39.3719	14.1496	5.09281	8.9475	6.96235	5.76475
	1.18596	7.85012	0.49598	5.18364	1.08852	1.62918
	0	0	0	0	0	0
	16.7811	16.5453	4.41613	0.4665	2.24037	0.90601
	22.8206	15.0881	7.08585	6.18712	4.73154	6.48697
	10.961	33.7617	11.0282	2.01297	1.70303	1.33366
	7.22918	13.5312	6.97935	2.71181	3.07667	3.22529
	22.72	22.0161	22.0161	2.03866	1.16937	2.21877
	13.7051	13.7061	6.01886	5.5917	1.94464	3.30947
	15.3506	15.3991	6.92142	5.28416	4.25308	4.09463
	11.4191	11.4642	8.24002	1.93911	0.59076	1.07705
	12.5285	3.13871	8.48861	4.01864	3.05452	1.84117
	13.1544	25.5916	12.5107	1.37752	2.76589	1.72518
	17.3706	11.2127	16.6796	1.81608	0.67552	1.77832
	12.9158	27.1807	12.3779	3.46835	1.85683	0.4322
	15.6878	11.4549	14.9581	3.28589	1.06847	1.24138
	25.9374	25.2614	25.2614	25.2614	25.2614	25.2614
	10.5431	10.2707	10.2707	11.0833	5.5324	5.5324
	21.6801	5.66	22.327	5.47801	5.47801	7.45525
	8.25285	28.829	8.57808	5.14537	3.11221	2.9035
	54.9739	29.2903	25.9545	4.89511	2.58723	6.44274
	10.2901	13.0364	1.75585	2.75275	1.1867	0.18288
	14.1295	14.1071	5.04051	6.81232	3.71363	5.57981
	6.61336	6.49599	3.02254	3.29223	4.43045	2.98392
	15.1077	9.01203	3.31854	2.14539	0.834	1.40143
	10.4262	36.5527	7.87963	5.44594	3.19447	0.77675
	24.3578	3.41388	3.58529	5.66667	6.55481	1.42085
	13.923	15.7485	5.10925	3.25202	2.31149	1.64929
	2.71202	10.3262	3.31125	0.84189	1.09485	0.44454
	30.2645	16.6136	11.4802	14.9841	10.9829	5.98667
	18.1957	40.4119	1.39642	1.12825	1.88265	0.44543
	30.8692	39.223	30.1896	23.3778	17.4067	9.41245
	9.6362	9.54125	9.54125	1.27129	3.9446	1.45526
	5.18491	4.50485	5.49942	2.40787	1.96702	1.97913
	5.64562	5.57055	6.52699	2.44792	1.93335	1.66685
	10.988	7.5578	8.83004	3.89723	0.81663	1.57746
	9.4792	30.521	4.5109	3.773	3.21301	0.65605
	17.4767	11.3876	7.06689	3.66673	2.90534	2.56556
	22.5236	24.0733	6.50481	3.73465	3.06963	2.33067
	31.998	19.5877	10.4912	3.41025	2.5883	3.43028
	16.7811	16.5453	4.41613	0.4665	2.24037	0.90601
	0	0	0	0	0	0
	4.33486	9.96452	1.93631	2.01478	2.07926	1.76163
	19.0297	20.9556	18.3719	3.75555	6.99013	3.00279
	15.5294	51.1797	1.30121	3.48699	1.3739	0.45211
	25.625	24.9438	24.9438	4.20103	0.8605	1.6686
	11.2162	11.9239	7.82844	2.85431	2.29152	2.50076
	20.9376	21.181	6.22373	2.87186	2.80448	2.75102
	51.1159	50.3258	9.81973	4.97599	1.94417	4.04783
	19.9041	19.7869	1.87816	3.83457	3.8896	2.21155
	29.2352	22.1078	28.4982	0.75906	1.95328	1.7644
	19.8868	43.2594	19.4237	1.93169	1.67666	0.79591
	20.2783	14.1567	19.5522	4.97326	2.68965	2.32052
	11.8122	41.6	11.3775	1.7456	1.03635	0.32014
	19.7078	19.1039	19.1039	19.1039	19.1039	19.1039
	8.71558	7.99782	7.99782	16.2812	5.91911	5.91911
	5.89466	36.246	6.34169	6.29004	6.29004	1.07383
	10.5441	8.57394	10.9326	3.72547	2.29262	1.76437
	2.26456	21.8872	0.76301	1.98146	1.93592	2.20269
	51.7151	18.2001	7.39999	5.54627	4.78496	8.08067
	1.76601	1.62304	1.38032	1.29727	4.47141	4.38768
	17.349	17.1194	5.17297	6.66212	7.66252	4.30517
	7.00063	41.5636	5.80039	8.33887	1.49095	2.52392
	20.549	13.1776	3.23389	3.08294	2.48134	2.89898
	5.13059	28.1176	2.84568	4.25946	0.98703	1.10999
	14.3148	2.51639	9.41441	3.80912	1.18474	1.8398
	2.90697	8.80936	3.28068	1.25968	1.53958	0.57693
	13.349	36.2835	8.53878	6.14764	4.44538	0.2455
	50.3381	13.9973	7.16948	5.07531	3.08642	3.29306
	7.75638	38.6669	7.67703	4.20364	2.74392	4.51557
	82.9912	82.729	82.729	1.34891	2.87658	8.34758
	6.34074	5.71696	5.99065	3.59091	2.4582	2.52658
	3.87605	9.06133	6.85511	3.04375	1.7232	1.37524
	4.58846	37.1186	7.4032	4.59824	0.6117	2.67365
	13.4489	9.14159	7.21601	6.03457	3.71783	1.40438
	14.1261	29.8466	4.13529	4.06509	0.27544	1.03921
	21.2537	15.288	5.42791	3.99528	1.01507	0.80454
	11.0304	26.3511	3.72798	4.23166	0.92901	1.70936
	22.8206	15.0881	7.08585	6.18712	4.73154	6.48697
	4.33486	9.96452	1.93631	2.01478	2.07926	1.76163
	0	0	0	0	0	0
	2.70089	45.7243	2.44315	3.52123	3.16072	2.35633
	15.1674	18.1597	7.47103	3.02707	2.10624	4.32404
	22.6028	21.9143	21.9143	3.33892	1.33382	0.50925
	15.5326	15.7334	5.8396	3.53768	0.06567	0.20696
	11.4046	11.9363	6.62579	3.71024	1.51448	0.27982
	9.51686	9.41683	6.27554	1.81288	1.15114	1.68128
	57.9694	13.3658	9.58721	5.15779	2.82204	11.6855
	17.8199	39.0812	17.356	4.22632	5.01119	3.09717
	28.7136	20.7487	28.1186	2.75665	4.65957	3.24946
	11.4817	42.5363	11.0496	3.3417	2.01529	0.91249
	20.1989	15.8413	19.6572	4.71868	1.37366	0.35546
	20.8131	20.0583	20.0583	20.0583	20.0583	20.0583
	10.6899	10.1965	10.1965	7.79638	4.54492	4.54492
	9.85255	6.65741	10.1495	5.57916	5.57916	3.57919
	3.56349	31.044	3.70976	7.1072	3.01473	1.98489
	7.37277	21.2926	6.97218	6.34683	3.06473	2.58192
	6.27102	43.955	6.29705	4.11042	3.50076	0.97318
	11.8845	11.6493	11.6493	8.78075	5.7367	4.63801
	3.39774	2.91272	2.91272	6.71068	9.08031	2.83406
	14.6062	9.48269	14.0411	0.57536	1.80536	0.94655
	9.27476	33.9685	8.68733	3.58716	5.33679	0.81368
	8.36312	12.2207	8.64952	5.81855	5.13813	1.8721
	9.32578	34.5158	9.35518	2.77971	4.29102	1.44496
	1.35553	9.87905	1.90159	0.4717	1.12581	0.39132
	20.2094	11.544	19.7622	10.2394	10.7604	4.24631
	11.8628	35.4074	11.2886	5.52285	5.52285	2.28304
	6.22898	7.13547	5.62112	12.7862	7.40062	8.05167
	10.597	10.5144	10.5144	0.75264	2.52873	1.10859
	6.25177	5.52656	5.52656	0.93643	2.43161	2.10034
	5.96606	7.90655	5.42797	0.27552	2.08202	1.52228
	10.8275	8.2162	10.3211	1.28958	0.49391	0.85903
	7.64057	29.8682	7.09101	3.32149	5.74883	1.04507
	7.0515	10.717	7.16399	1.80435	2.00777	2.59882
	18.3776	23.4536	18.4155	1.32609	3.66054	2.24625
	6.9855	10.2555	7.31775	3.16802	1.52563	2.85662
	10.961	33.7617	11.0282	2.01297	1.70303	1.33366
	19.0297	20.9556	18.3719	3.75555	6.99013	3.00279
	2.70089	45.7243	2.44315	3.52123	3.16072	2.35633
	0	0	0	0	0	0
	9.99928	3.37385	10.0171	3.83109	3.60708	0.6588
	23.2793	22.5698	22.5698	3.73976	1.83007	2.35983
	3.8638	4.09085	4.09085	0.71827	2.385	2.47438
	15.6268	15.6855	15.6855	0.86863	3.32728	3.02165
	2.38937	3.19373	3.19373	6.455	7.48615	4.99179
	13.7313	13.7574	13.7574	3.90865	5.88204	2.20622
	40.7281	16.4927	39.963	4.26919	5.62085	0.87429
	20.6236	40.9351	20.3048	3.72208	0.91738	1.77621
	17.7813	17.7295	17.0375	12.9178	10.7834	3.6627
	7.32461	38.8101	7.07426	3.86054	4.74453	1.5575
	19.0384	18.3156	18.3156	18.3156	18.3156	18.3156
	13.2507	12.4547	12.4547	11.6087	4.25977	4.25977
	7.03634	34.1409	7.03582	5.39724	5.39724	4.5939
	6.30035	11.2656	5.70537	3.20577	2.24542	1.64095
	7.28139	47.0213	5.44527	4.04322	1.21773	1.13583
	10.8242	15.3524	4.65392	4.33053	0.78529	1.14635
	9.85517	9.7601	2.29812	2.05348	3.10983	2.2979
	12.2591	11.9243	1.30242	4.50837	6.07795	3.30788
	11.4697	35.5597	5.47005	7.19045	1.31187	0.83759
	16.1511	13.1317	4.15963	1.79371	1.94226	1.15406
	7.25459	38.3146	3.96947	4.22823	0.6207	1.31135
	8.11483	11.7965	6.96134	2.52488	1.80737	0.65664
	2.22816	7.88219	2.19435	0.92381	1.59426	0.70701
	10.2722	29.265	6.71155	2.18836	1.20615	2.04555
	29.6333	10.9891	5.45588	4.67405	3.63779	3.22136
	3.30213	42.909	3.00936	6.54057	4.83559	3.84298
	29.7821	29.5728	29.5728	2.42289	0.58662	1.36562
	7.03783	6.36455	5.16673	2.5553	1.66067	1.90179
	5.6451	8.5859	6.38432	2.60073	1.68103	1.61111
	8.20386	31.4426	7.0349	4.43842	0.80922	0.90853
	12.3928	10.7189	5.06048	3.60671	2.80434	0.90591
	9.52092	26.3032	5.08045	3.32406	0.74916	2.04303
	16.7034	11.5365	5.98686	2.87844	1.60539	1.78711
	4.64374	34.0861	6.53371	4.45065	0.76535	1.6275
	7.22918	13.5312	6.97935	2.71181	3.07667	3.22529
	15.5294	51.1797	1.30121	3.48699	1.3739	0.45211
	15.1674	18.1597	7.47103	3.02707	2.10624	4.32404
	9.99928	3.37385	10.0171	3.83109	3.60708	0.6588
	0	0	0	0	0	0
	21.2433	20.5209	20.5209	1.05608	1.19189	1.12264
	9.62197	9.38029	5.89743	2.83225	0.48321	1.55243
	9.79037	9.52162	6.46588	2.29968	1.48134	1.64053
	4.51576	4.84897	4.29418	3.4357	0.46195	1.17997
	9.43236	1.46798	5.30964	4.31522	4.37512	5.53854
	15.925	31.0987	15.5608	4.91768	6.43308	2.2157
	41.0879	18.6957	40.5254	1.73995	5.10171	0.76514
	10.8351	44.7791	10.5377	4.87657	5.48766	2.4192
	30.9967	14.1173	30.4711	3.49213	2.64163	5.56981
	24.0352	23.3281	23.3281	23.3281	23.3281	23.3281
	20.0789	19.447	19.447	17.4876	3.52002	3.52002
	35.3802	34.6979	34.6979	0.84334	0.84334	0.99598
	24.9266	24.2257	24.2257	6.37976	1.3408	1.217
	25.685	24.9655	24.9655	3.51394	0.37751	1.46697
	23.9614	23.2799	23.2799	3.79317	1.18793	1.34857
	38.4377	37.7789	37.7789	37.7789	0.64028	2.63329
	27.8756	27.2053	27.2053	27.2053	9.81259	2.47549
	38.0973	37.5012	37.5012	6.70939	2.16168	2.56491
	24.3591	23.7133	23.7133	11.7839	5.58949	1.91322
	31.1336	30.443	30.443	3.40359	1.28178	1.52949
	24.9694	24.2866	24.2866	3.38892	2.49199	0.73068
	43.5323	44.2422	44.2422	5.95775	1.14463	2.83804
	36.582	35.8938	35.8938	11.5036	7.32062	2.8766
	25.9269	25.2211	25.2211	5.95994	5.33962	3.96124
	27.6172	26.9242	26.9242	3.33918	2.03805	2.1173
	25.7912	25.1951	25.1951	2.58568	1.92179	1.53026
	29.1136	29.8033	29.8033	4.8361	2.18072	1.73092
	54.1648	54.7209	54.7209	8.17392	2.32124	1.47379
	41.3121	40.7099	40.7099	10.8576	1.24365	3.68949
	23.908	23.2734	23.2734	9.01572	6.66714	1.38365
	25.8987	25.1475	25.1475	1.74834	0.24968	1.21912
	24.7922	24.1578	24.1578	2.54903	1.95024	1.97745
	27.6046	26.9117	26.9117	2.6101	0.4863	1.23481
	22.72	22.0161	22.0161	2.03866	1.16937	2.21877
	25.625	24.9438	24.9438	4.20103	0.8605	1.6686
	22.6028	21.9143	21.9143	3.33892	1.33382	0.50925
	23.2793	22.5698	22.5698	3.73976	1.83007	2.35983
	21.2433	20.5209	20.5209	1.05608	1.19189	1.12264
	0	0	0	0	0	0
	25.1085	24.3724	24.3724	6.65009	1.47624	1.77512
	22.7433	22.081	22.081	2.42584	2.84259	1.08283
	29.495	28.7543	28.7543	3.38429	0.66928	1.67676
	27.3912	26.6927	26.6927	2.52599	3.08521	1.19795
	23.3203	22.5725	22.5725	3.5231	1.57371	1.53806
	22.7362	22.0467	22.0467	2.72121	0.56103	0.75658
	23.7798	23.0474	23.0474	2.84063	1.84944	2.2673
	22.5168	21.8212	21.8212	2.85607	0.65165	1.50509
	67.7445	67.9535	67.9535	67.9535	67.9535	67.9535
	22.3254	21.9994	21.9994	32.7736	9.63359	9.63359
	34.2227	34.634	34.634	15.0238	15.0238	4.06069
	12.8801	13.0376	13.0376	0.93143	4.21789	3.69858
	5.53779	6.29409	11.0769	3.57678	1.94078	2.41804
	17.131	17.1726	7.79033	4.82329	0.71176	1.21394
	27.4485	27.965	9.28744	10.5569	5.01912	3.43413
	4.03874	4.46719	10.8392	3.82917	2.46207	3.10093
	37.1081	37.528	7.22391	17.7233	8.4276	3.47197
	7.96612	7.99713	12.4383	9.50069	5.02715	2.58407
	18.145	18.3065	9.04701	6.1848	6.0325	2.7678
	15.8216	15.8704	4.42616	4.03116	0.85787	0.96523
	1.79326	2.5735	2.5735	0.70577	1.00554	0.17597
	18.7934	18.8588	10.4195	14.0015	10.2795	2.87812
	14.8054	14.7538	3.12069	2.26218	2.06066	0.51727
	7.88966	8.3362	8.3362	3.96271	4.80655	2.96247
	20.8506	20.9712	20.9712	2.84161	2.84429	1.71243
	5.72018	4.93363	4.06679	1.71054	1.5053	1.45509
	9.93072	9.5073	5.43148	1.92263	1.6194	1.20024
	40.1978	40.467	10.792	5.00248	4.69299	7.89705
	6.03544	5.80947	3.85764	3.21223	3.06938	1.8992
	8.8393	8.99672	9.97363	3.97463	3.45431	3.21635
	18.4858	18.4878	10.0456	7.09551	1.89204	2.18009
	12.7915	12.7755	11.8529	2.53936	1.91119	2.75729
	13.7051	13.7061	6.01886	5.5917	1.94464	3.30947
	11.2162	11.9239	7.82844	2.85431	2.29152	2.50076
	15.5326	15.7334	5.8396	3.53768	0.06567	0.20696
	3.8638	4.09085	4.09085	0.71827	2.385	2.47438
	9.62197	9.38029	5.89743	2.83225	0.48321	1.55243
	25.1085	24.3724	24.3724	6.65009	1.47624	1.77512
	0	0	0	0	0	0
	5.72366	5.72366	13.2415	10.3053	3.39497	4.1556
	3.23368	3.17434	10.8735	4.4178	1.49025	1.48115
	14.428	14.2674	6.74301	2.30795	2.36861	1.99614
	11.2532	10.4753	10.4753	1.33719	2.81309	2.34194
	14.5167	14.0322	14.0322	1.66395	1.28118	1.42183
	11.544	10.8282	10.8282	0.82645	1.91052	2.11682
	16.4085	16.0148	16.0148	1.95064	1.89389	1.86221
	45.3062	45.5221	45.5221	45.5221	45.5221	45.5221
	52.4455	51.8331	51.8331	71.787	17.2955	17.2955
	25.9637	26.0799	26.0799	11.6488	11.6488	5.12866
	53.7609	54.0638	54.0638	8.34353	4.71992	3.52147
	23.106	23.2181	7.73623	3.59115	2.96712	2.48005
	4.26425	4.77822	9.021	5.25692	2.50044	1.43423
	16.467	16.8876	8.14831	9.23327	3.85666	1.55963
	29.4278	29.6273	13.0201	4.1676	1.9795	0.87997
	14.8447	15.2985	10.7253	16.3585	5.81253	3.16699
	40.1052	40.1795	25.553	18.6324	5.65862	3.18834
	23.1926	23.2634	7.61268	7.53947	5.52424	3.94475
	11.1917	11.473	8.49654	4.00905	1.91705	0.36842
	7.19795	7.4494	7.4494	0.94668	1.57235	0.4748
	5.38721	5.84224	5.49533	10.3711	10.6435	0.72757
	43.1945	43.1962	6.557	4.60052	4.22377	1.77842
	16.8129	16.9863	16.9863	3.74516	5.28255	2.39307
	10.3107	10.828	10.828	1.37062	3.61574	1.82743
	9.621	9.1797	4.89246	3.21752	2.6244	2.90394
	6.0919	5.3531	5.85358	2.19971	1.73652	1.5866
	9.6286	10.0065	10.7034	6.37498	3.04397	4.33025
	45.8891	45.8631	11.1914	8.99017	1.99352	4.60467
	26.7684	26.7855	6.53915	7.3765	3.77267	3.70381
	16.9426	17.0708	8.27405	2.18582	1.76757	2.6043
	18.3859	18.4084	5.97524	4.5872	3.05386	2.69352
	15.3506	15.3991	6.92142	5.28416	4.25308	4.09463
	20.9376	21.181	6.22373	2.87186	2.80448	2.75102
	11.4046	11.9363	6.62579	3.71024	1.51448	0.27982
	15.6268	15.6855	15.6855	0.86863	3.32728	3.02165
	9.79037	9.52162	6.46588	2.29968	1.48134	1.64053
	22.7433	22.081	22.081	2.42584	2.84259	1.08283
	5.72366	5.72366	13.2415	10.3053	3.39497	4.1556
	0	0	0	0	0	0
	17.961	17.9854	8.45102	3.9051	2.02942	1.98587
	7.14887	6.78913	5.67498	0.56055	1.61972	1.52714
	13.4253	12.9049	12.9049	1.47967	3.65142	2.44772
	9.88957	9.08656	9.08656	1.52465	2.72786	1.68003
	14.8173	14.3901	14.3901	0.27643	2.02263	2.04439
	9.94527	9.16155	9.16155	0.69878	2.19749	1.63647
	38.4352	37.664	37.664	37.664	37.664	37.664
	17.5252	17.0206	17.0206	15.6358	7.0257	7.0257
	14.8933	14.6606	14.6606	8.38345	8.38345	4.86568
	5.92417	5.55114	5.55114	3.70157	3.12326	2.09621
	21.7491	21.087	27.214	8.29184	4.17093	1.29312
	6.81579	6.74933	5.14203	2.55251	0.26599	0.49507
	26.0696	25.6713	4.52888	2.85635	6.23227	6.47237
	5.76486	5.36396	2.11165	4.56034	5.37952	2.20811
	25.2249	24.6221	10.2887	7.38549	1.07428	3.67028
	13.1861	12.6974	10.6451	6.07265	3.24909	1.41717
	16.2315	15.7853	16.2183	6.11677	5.38518	2.21887
	10.284	10.2099	9.21137	4.98317	2.37151	1.4378
	1.70267	1.02789	1.02789	1.4734	2.0581	0.74196
	34.9126	34.3961	17.0163	22.3811	15.7639	6.44562
	20.5921	20.1706	6.1857	3.70848	1.11136	0.37175
	65.3245	64.6492	64.6492	19.8393	13.3235	15.9028
	10.3755	10.3173	10.3173	4.30777	4.32774	3.19056
	7.13339	6.36788	6.59254	3.1271	1.93079	1.84059
	7.53047	6.98244	7.78942	3.01648	1.72902	1.26051
	17.7614	17.2284	14.1655	6.92051	0.97791	2.5906
	10.8372	10.363	7.28251	5.03095	2.92322	0.62434
	8.01333	7.82186	11.4616	4.81968	1.47321	1.49151
	19.7782	19.773	8.58518	4.94053	2.15673	0.98713
	9.89532	9.93051	19.4352	7.57204	1.76463	1.9247
	11.4191	11.4642	8.24002	1.93911	0.59076	1.07705
	51.1159	50.3258	9.81973	4.97599	1.94417	4.04783
	9.51686	9.41683	6.27554	1.81288	1.15114	1.68128
	2.38937	3.19373	3.19373	6.455	7.48615	4.99179
	4.51576	4.84897	4.29418	3.4357	0.46195	1.17997
	29.495	28.7543	28.7543	3.38429	0.66928	1.67676
	3.23368	3.17434	10.8735	4.4178	1.49025	1.48115
	17.961	17.9854	8.45102	3.9051	2.02942	1.98587
	0	0	0	0	0	0
	7.79415	7.79178	5.26177	5.83003	4.13971	2.18692
	8.92463	8.23435	8.23435	3.46088	4.99383	1.23933
	4.30087	3.90427	3.90427	0.52179	1.44423	0.82395
	8.02545	7.23127	7.23127	6.60816	2.28915	2.44312
	6.54424	6.15082	6.15082	2.47491	1.772	1.36772
	34.5853	33.9369	33.9369	33.9369	33.9369	33.9369
	20.4638	19.7077	19.7077	11.4529	4.27959	4.27959
	8.8155	8.33661	8.33661	4.40883	4.40883	5.27447
	17.2837	10.2884	16.7466	5.37021	8.8289	1.27318
	14.3649	14.1759	4.98128	4.62423	4.46322	3.16432
	28.0264	13.3142	7.39562	1.91	4.63533	4.9935
	12.005	11.7677	3.46101	2.71662	4.94091	2.18456
	28.8813	28.5749	6.96253	4.08101	5.47762	3.44528
	15.1518	14.7246	8.93191	9.79711	2.81441	1.67006
	28.6156	20.3274	6.73972	4.9297	1.4566	3.85597
	10.3567	9.98771	6.19539	5.42167	2.5842	2.55243
	14.5269	8.12206	9.60837	2.14575	4.95622	1.00243
	4.23384	3.98843	3.98843	0.23502	1.62599	0.40968
	14.1385	13.7549	7.67948	6.86631	9.89438	3.11758
	65.5401	25.9211	7.46278	4.09682	7.72647	5.11465
	12.5451	12.462	12.462	6.15021	6.09844	3.10171
	106.889	106.536	106.536	7.64265	5.57412	15.2989
	8.76648	8.08463	6.55699	3.361	2.63883	2.95856
	5.9389	5.13908	7.0826	2.03243	1.46028	1.44563
	10.0588	9.51863	8.76438	4.2749	2.81247	2.79067
	20.8654	14.6681	7.68923	4.07918	3.20315	1.69467
	14.5449	20.2765	5.76864	3.09508	2.36406	3.09295
	15.5887	10.5034	3.31137	1.07165	3.47693	1.9088
	9.68	9.47862	6.61379	4.53124	3.46899	2.97036
	12.5285	3.13871	8.48861	4.01864	3.05452	1.84117
	19.9041	19.7869	1.87816	3.83457	3.8896	2.21155
	57.9694	13.3658	9.58721	5.15779	2.82204	11.6855
	13.7313	13.7574	13.7574	3.90865	5.88204	2.20622
	9.43236	1.46798	5.30964	4.31522	4.37512	5.53854
	27.3912	26.6927	26.6927	2.52599	3.08521	1.19795
	14.428	14.2674	6.74301	2.30795	2.36861	1.99614
	7.14887	6.78913	5.67498	0.56055	1.61972	1.52714
	7.79415	7.79178	5.26177	5.83003	4.13971	2.18692
	0	0	0	0	0	0
	3.50058	2.97987	2.97987	4.75837	6.36515	2.75473
	12.2175	9.60755	11.9561	6.34243	8.5806	3.66879
	7.88796	7.52432	7.52432	2.29962	2.68165	1.4797
	9.05588	9.17242	8.43895	0.79755	1.3478	0.74467
	23.2329	22.4365	22.4365	22.4365	22.4365	22.4365
	14.5697	13.8307	13.8307	6.58395	3.97297	3.97297
	13.9651	12.7273	13.2331	7.63292	7.63292	5.24186
	10.9992	24.8166	10.2918	3.74999	4.73287	3.20705
	20.6264	21.0509	19.8284	2.58862	1.73401	0.97345
	12.8776	34.9827	12.3052	4.87198	5.3063	2.3443
	15.1324	14.5463	14.5463	6.1726	4.38772	4.9803
	10.8862	10.3958	10.3958	7.23027	9.60345	3.44428
	18.9954	14.0816	18.3191	3.87223	3.52579	1.50256
	14.3537	29.5481	13.7065	3.23575	5.97704	1.74349
	14.7356	13.1718	14.0049	2.71506	3.50054	1.79597
	12.8293	26.4933	12.1945	4.30613	6.41985	3.03767
	2.91118	9.55989	2.12261	0.58678	1.99303	0.79174
	15.1605	3.26985	14.6192	8.94411	9.47949	4.12487
	15.9705	29.7514	15.4523	4.61707	4.61707	1.6989
	19.8189	19.6786	19.075	4.39754	4.77437	7.34464
	12.1842	11.6627	11.6627	3.02609	5.10821	2.53512
	8.29442	7.52572	7.52572	1.16841	2.49318	2.19316
	7.60699	7.71133	6.90336	0.36047	2.05193	1.47078
	15.9468	12.0893	15.2401	1.80152	1.98784	0.77504
	13.17	25.443	12.4653	4.1618	6.40362	2.31662
	13.9345	9.71004	13.1703	1.75145	2.74632	2.6961
	15.8193	18.604	15.3186	1.88435	3.85892	2.45282
	16.2272	11.4866	15.4481	2.28463	2.79538	2.01965
	13.1544	25.5916	12.5107	1.37752	2.76589	1.72518
	29.2352	22.1078	28.4982	0.75906	1.95328	1.7644
	17.8199	39.0812	17.356	4.22632	5.01119	3.09717
	40.7281	16.4927	39.963	4.26919	5.62085	0.87429
	15.925	31.0987	15.5608	4.91768	6.43308	2.2157
	23.3203	22.5725	22.5725	3.5231	1.57371	1.53806
	11.2532	10.4753	10.4753	1.33719	2.81309	2.34194
	13.4253	12.9049	12.9049	1.47967	3.65142	2.44772
	8.92463	8.23435	8.23435	3.46088	4.99383	1.23933
	3.50058	2.97987	2.97987	4.75837	6.36515	2.75473
	0	0	0	0	0	0
	4.2642	32.6846	4.2642	5.34101	3.69866	1.38665
	39.0418	6.84461	38.2578	19.5869	16.4009	5.37419
	19.9603	34.3772	19.5708	6.53809	7.77311	4.21704
	21.3892	20.6691	20.6691	20.6691	20.6691	20.6691
	16.5716	15.8098	15.8098	10.1009	4.5874	4.5874
	10.6423	23.2164	9.94396	6.509	6.509	5.07603
	15.5568	12.1539	15.0001	2.70573	3.29996	1.53154
	14.6487	37.374	14.077	0.25741	2.14898	0.49856
	18.896	17.6805	18.1984	3.17449	4.00589	1.64747
	9.95819	9.41115	9.41115	3.58315	4.00455	3.85608
	20.2248	19.8742	19.8742	7.01618	10.0124	2.86766
	12.5063	28.2459	11.85	4.80793	1.00695	1.72554
	21.2257	16.5209	20.6592	2.97303	6.63378	1.22048
	10.6784	29.0409	10.0203	0.73921	1.07391	0.63184
	15.3626	12.6423	14.6344	1.83209	4.08754	1.44886
	4.88055	8.19696	4.55316	0.60209	1.65189	0.67237
	7.67447	21.6616	6.95649	3.70208	4.48654	1.76233
	30.9844	14.7508	30.6211	3.06064	3.06064	2.43193
	11.2606	36.2751	10.6828	1.62666	3.13975	5.16731
	14.0759	13.2965	13.2965	1.02829	3.27651	0.76447
	9.19461	8.54475	8.54475	2.10105	2.97125	2.40357
	6.65507	6.42755	5.86722	0.76568	1.78508	1.13336
	11.5343	25.3002	10.8209	2.50304	0.53529	1.36655
	17.908	12.6686	17.2993	4.41825	5.97731	1.96803
	15.6116	19.3655	15.1	2.05683	0.89425	1.41051
	12.5465	9.59367	11.7761	1.85397	2.28606	1.20954
	12.859	26.0174	12.2285	1.72757	0.75191	0.50274
	17.3706	11.2127	16.6796	1.81608	0.67552	1.77832
	19.8868	43.2594	19.4237	1.93169	1.67666	0.79591
	28.7136	20.7487	28.1186	2.75665	4.65957	3.24946
	20.6236	40.9351	20.3048	3.72208	0.91738	1.77621
	41.0879	18.6957	40.5254	1.73995	5.10171	0.76514
	22.7362	22.0467	22.0467	2.72121	0.56103	0.75658
	14.5167	14.0322	14.0322	1.66395	1.28118	1.42183
	9.88957	9.08656	9.08656	1.52465	2.72786	1.68003
	4.30087	3.90427	3.90427	0.52179	1.44423	0.82395
	12.2175	9.60755	11.9561	6.34243	8.5806	3.66879
	4.2642	32.6846	4.2642	5.34101	3.69866	1.38665
	0	0	0	0	0	0
	20.8899	42.5815	20.5183	6.58086	7.73394	3.61376
	40.7436	6.64939	39.9522	2.93791	8.61166	6.91681
	25.1073	24.3427	24.3427	24.3427	24.3427	24.3427
	15.7414	15.013	15.013	5.92827	3.77892	3.77892
	9.9947	9.70093	9.30873	3.33017	3.33017	3.62836
	8.49638	28.5872	7.8108	7.73145	1.71316	1.56148
	17.2848	15.1357	16.511	4.26059	0.22881	1.79662
	10.8537	38.146	10.3575	2.92047	1.10242	0.95334
	11.852	11.2975	11.2975	5.80685	2.52219	1.72294
	10.6311	10.0555	10.0555	4.03692	6.94884	2.80646
	17.0507	9.79511	16.3342	2.29903	0.29527	0.25991
	15.6486	31.7165	14.9858	3.91127	4.44705	1.48975
	10.472	10.3576	9.70779	5.18046	3.35099	0.16627
	12.2089	30.4003	11.6843	2.22497	2.37757	1.37562
	3.16413	10.3051	2.42525	0.24639	1.60801	0.88758
	17.0151	4.87072	16.3295	8.1132	7.37779	3.9066
	15.9999	15.4122	15.4122	8.63008	8.63008	4.55958
	13.388	12.784	12.5877	10.9178	3.41075	3.12807
	12.2447	11.8135	11.8135	3.56959	2.93997	0.94961
	7.97903	7.25788	7.25788	0.64965	1.26484	1.16664
	8.25775	9.89215	7.53331	0.34257	1.92585	1.77914
	15.6498	10.2703	14.904	2.17617	0.71629	0.15838
	13.9012	27.0662	13.2014	2.94186	4.30908	1.42312
	14.4648	10.2761	13.7917	1.00079	1.67494	2.60567
	17.5921	21.011	17.2002	0.49352	2.24381	2.15951
	15.0423	10.8215	14.2424	2.10883	0.67593	2.43676
	12.9158	27.1807	12.3779	3.46835	1.85683	0.4322
	20.2783	14.1567	19.5522	4.97326	2.68965	2.32052
	11.4817	42.5363	11.0496	3.3417	2.01529	0.91249
	17.7813	17.7295	17.0375	12.9178	10.7834	3.6627
	10.8351	44.7791	10.5377	4.87657	5.48766	2.4192
	23.7798	23.0474	23.0474	2.84063	1.84944	2.2673
	11.544	10.8282	10.8282	0.82645	1.91052	2.11682
	14.8173	14.3901	14.3901	0.27643	2.02263	2.04439
	8.02545	7.23127	7.23127	6.60816	2.28915	2.44312
	7.88796	7.52432	7.52432	2.29962	2.68165	1.4797
	39.0418	6.84461	38.2578	19.5869	16.4009	5.37419
	20.8899	42.5815	20.5183	6.58086	7.73394	3.61376
	0	0	0	0	0	0
	3.32168	42.5	3.32168	6.17166	6.62354	2.2023
	21.1873	20.4503	20.4503	20.4503	20.4503	20.4503
	16.4995	15.7071	15.7071	8.79138	4.66686	4.66686
	8.7906	24.229	8.19654	2.89998	2.89998	3.78858
	13.294	10.8309	12.7636	7.28556	0.6112	0.21629
	11.7229	36.2015	11.2412	2.71513	1.56098	0.21715
	14.2446	15.1438	13.4936	4.70008	2.35086	0.7378
	7.27292	6.61695	6.61695	4.13173	3.57763	3.22558
	17.3658	16.9211	16.9211	7.92221	7.40495	2.92483
	11.8532	27.7827	11.18	4.99379	2.65934	1.21607
	20.5734	13.5307	19.9326	0.87684	4.21868	1.56255
	7.45687	28.0899	6.85641	3.4335	1.93094	0.56741
	12.6724	12.1104	11.8928	3.45697	3.29874	1.05975
	4.59992	4.19585	4.19585	0.85095	1.80109	0.91896
	11.7507	17.587	11.023	4.3464	4.66961	3.18531
	26.8393	15.1701	26.4614	11.1016	11.1016	7.28915
	9.93849	9.39587	9.39587	6.51969	3.17372	1.96968
	14.6107	13.9738	13.9738	3.3112	1.93876	3.1954
	9.13491	8.49569	8.49569	1.69151	2.45039	2.21747
	6.93081	6.81621	6.12894	1.23384	1.93621	1.58964
	11.4099	23.8316	10.7067	3.31235	2.14709	0.86857
	17.7874	11.8322	17.1153	2.04709	5.07657	1.87524
	17.2303	19.788	16.8512	1.24839	1.54143	2.2996
	13.1511	8.11946	12.4659	1.60313	2.09508	1.60993
	13.2355	26.1878	12.7447	1.82287	1.55741	1.31283
	15.6878	11.4549	14.9581	3.28589	1.06847	1.24138
	11.8122	41.6	11.3775	1.7456	1.03635	0.32014
	20.1989	15.8413	19.6572	4.71868	1.37366	0.35546
	7.32461	38.8101	7.07426	3.86054	4.74453	1.5575
	30.9967	14.1173	30.4711	3.49213	2.64163	5.56981
	22.5168	21.8212	21.8212	2.85607	0.65165	1.50509
	16.4085	16.0148	16.0148	1.95064	1.89389	1.86221
	9.94527	9.16155	9.16155	0.69878	2.19749	1.63647
	6.54424	6.15082	6.15082	2.47491	1.772	1.36772
	9.05588	9.17242	8.43895	0.79755	1.3478	0.74467
	19.9603	34.3772	19.5708	6.53809	7.77311	4.21704
	40.7436	6.64939	39.9522	2.93791	8.61166	6.91681
	3.32168	42.5	3.32168	6.17166	6.62354	2.2023
mean	0	0	0	0	0	0
stdev
count	16.9147	20.4025	13.3044	7.66925	5.84015	4.33343
SEM	14.3941	15.0649	12.9704	9.56333	8.15331	7.52649
df	1443	1443	1444	1444	1444	1444
theoretixcal mean	0.378922	0.396583	0.341326	0.251667	0.214561	0.198066
	1442	1442	1443	1443	1443	1443
t	0	0	0	0	0	0
p	44.6391	51.4458	38.9786	30.4738	27.2191	21.8787
	2.41234e-274	0	6.20683e-228	3.43004e-158	2.5875e-132	3.60607e-92
	****	****	****	****	****	****
paired t test
	O to N	N to 1	1 to 3	3 to 5	5 to 10
	2.35822e-10	1.1718e-40	4.66473e-39	3.48128e-08	2.63895e-07
	****	****	****	****	****
