# Supplementary material for: Automated cell annotation in multi-cell images using an improved CRF_ID algorithm
Source: eLife. 2025 Jan 24;12:RP89050. doi: 10.7554/eLife.89050 (PMC11759411; doi:10.7554/eLife.89050)
Supplement: Figure 3—source data 3. [file elife-89050-fig3-data3.xlsx]

## Sheet: Sheet1
Figure 3- source data for 3e
	PA/LR/DV relationship difference from glr-1 25
	Openworm	NeuroPAL	1	3	5	10
	0	0	0	0	0	0
	1	1	1	1	1	1
	1	1	1	1	1	1
	1	1	1	1	1	1
	0	0	0	0	0	0
	0	0	0	0	0	0
	0	0	0	0	0	0
	1	1	1	1	1	1
	0	0	0	0	0	0
	1	1	1	1	1	1
	0	0	0	0	0	0
	0	0	0	0	0	0
	0	0	0	0	0	0
	2	2	2	2	2	2
	0	0	0	0	0	0
	0	0	0	0	0	0
	0	0	0	0	0	0
	1	1	1	1	1	1
	0	0	0	0	0	0
	1	1	1	1	1	1
	1	1	1	1	1	1
	1	1	1	1	1	1
	1	1	1	1	1	1
	0	0	0	0	0	0
	0	0	0	0	0	0
	0	0	0	0	0	0
	0	0	0	0	0	0
	0	0	0	0	0	0
	0	0	0	0	0	0
	0	0	0	0	0	0
	1	1	1	1	1	1
	1	1	1	1	1	1
	0	0	0	0	0	0
	0	0	0	0	0	0
	0	0	0	0	0	0
	0	0	0	0	0	0
	1	1	1	1	1	1
	1	1	1	1	1	1
	1	1	1	1	1	1
	0	0	0	0	0	0
	1	1	1	0	0	0
	0.75	0.75	0.75	0.75	0.25	0.25
	0	0	0	0	0	0
	0	0	0	0	0	0
	0	0	0	0	0	0
	0	0	0	0	0	0
	0.25	0.25	0.25	0.75	0.25	0.25
	0.4	0.4	0.4	0.6	0.1	0.1
	0	0	0	0	0	0
	0	0	0	0	0	0
	0.66667	0.66667	0.66667	0.66667	0.16667	0.16667
	0	0	0	0	0	0
	1	1	1	0	0	0
	0	0	0	0	0	0
	0	0	0	0	0	0
	0.8	0.8	0.8	1	0.2	0.2
	0.66667	0.66667	0.66667	0.66667	0.33333	0.33333
	0.2	0.2	0.2	0.2	0.2	0.2
	0.2	0.2	0.2	0.8	0.3	0.3
	0.8	0.8	0.8	0.8	0.3	0.3
	1	1	1	1.6	0.6	0.6
	0	0	0	0	0	0
	0.25	0.25	0.25	0.75	0.25	0.25
	0	0	0	0	0	0
	0	0	0	0	0	0
	0	0	0	0	0	0
	0	0	0	0	0	0
	0	0	0	0	0	0
	0.8	0.8	0.8	0.8	0.3	0.3
	1.4	1.4	1.4	1.2	0.4	0.4
	0	0	0	0	0	0
	0	0	0	0	0	0
	0	0	0	0	0	0
	0.2	0.2	0.2	0.8	0.3	0.3
	1	1	1	0	0	0
	1.33333	1.33333	1.33333	0.66667	0.16667	0.16667
	1	1	1	1	1	1
	1	1	1	0	0	0
	0	0	0	0	0	0
	1	0.66667	0.66667	0.55556	0.55556	0.55556
	0.96296	0.76296	0.76296	1.03704	1.03704	0.14815
	0.35714	0.15714	0.15714	0.35714	0.35714	0.35714
	0.8	0.8	0.8	0.8	0.8	0.8
	0.65385	0.65385	0.65385	0.65385	0.65385	0.42308
	0.79167	0.59167	0.59167	0.79167	0.79167	0.79167
	0.52	0.52	0.52	0.52	0.52	0.52
	0.58333	0.76667	0.76667	0.83333	0.83333	0.33333
	0.75862	0.55862	0.55862	0.51724	0.51724	0.51724
	0	1	1	0	0	0
	1	1	1	1	1	0.33333
	0.5	0.5	0.5	0.5	0.5	0
	0.53333	0.46667	0.46667	0.46667	0.46667	0.03333
	0	0	0	0	0	0
	1	1	1	0.16	0.16	0.16
	0	0.5	0.5	0	0	0
	0.92	0.62	0.62	1.12	1.12	0.16
	0.64	0.44	0.44	0.64	0.64	0.14
	1.55172	0.24828	0.24828	0.82759	0.82759	0.32759
	0.82759	0.24828	0.24828	0.82759	0.82759	0.32759
	1.53571	0.78571	0.78571	0.46429	0.46429	0.53571
	0.65385	0.15385	0.15385	0.34615	0.34615	0.34615
	0.85714	0.85714	0.85714	0.71429	0.71429	0.35714
	0.24138	0.04138	0.04138	0.24138	0.24138	0.24138
	0.66667	0.46667	0.46667	0.62963	0.62963	0.16667
	0.22222	0.02222	0.02222	0.22222	0.22222	0.22222
	1.80952	1.80952	1.80952	0.19048	0.19048	0.19048
	0.86207	0.86207	0.86207	0.13793	0.13793	0.13793
	0	0	0	0	0	0
	0.61538	0.61538	0.61538	0.38462	0.38462	0.11538
	0	0	0	0	0	0
	0.66667	0.16667	0.16667	0.33333	0.33333	0.33333
	0	0	0	0	0	0
	1.45	0.85	0.85	0.55	0.55	0.45
	0.68421	0.68421	0.68421	0.31579	0.31579	0.18421
	1	1	1	1	1	1
	0.75	0.75	0.75	0.75	0.25	0.25
	1	0.66667	0.66667	0.55556	0.55556	0.55556
	0	0	0	0	0	0
	0.03704	0.03704	0.03704	0.03704	0.03704	0.03704
	0.28571	0.28571	0.28571	0.28571	0.28571	0.08571
	0.16	0.16	0.16	0.16	0.16	0.16
	0.53846	0.53846	0.53846	0.53846	0.69231	0.28846
	0.42857	0.42857	0.42857	0.42857	0.42857	0.17143
	0.28	0.53333	0.53333	0.28	0.28	0.08
	0.07407	0.16667	0.16667	0.07407	0.07407	0.07407
	0.75	0.60714	0.60714	0.75	0.25	0.14286
	0.17647	0.17647	0.17647	0.17647	0.17647	0.17647
	0.47059	0.52941	0.52941	0.47059	0.47059	0.07059
	1.1	0.9	0.9	0.3	0.3	0.3
	0	0	0	0	0	0
	0.33333	0.33333	0.33333	0.33333	0.16667	0.26667
	0.72	0.72	0.72	0.28	0.28	0.28
	0.22222	1.27778	1.27778	0.22222	0.22222	0.22222
	0.11111	0.11111	0.11111	0.11111	0.38889	0.08889
	0.03846	0.81868	0.81868	0.03846	0.03846	0.03846
	0.53571	0.53571	0.53571	0.53571	0.46429	0.36429
	1.48276	0.58621	0.58621	0.48276	0.08621	0.08276
	0.18519	0.56481	0.56481	0.18519	0.31481	0.01481
	1.08	1.76	1.76	0.24	0.42	0.12
	0	0	0	0	0	0
	0.24138	0.38424	0.38424	0.24138	0.25862	0.04138
	0	0.33333	0.33333	0	0	0
	0.42857	0.71429	0.71429	0.42857	0.07143	0.17143
	0.66667	0.66667	0.66667	0.66667	0.16667	0.06667
	0.10345	0.10345	0.10345	0.10345	0.10345	0.10345
	1	1	1	0	0	0
	0	0	0	0	0	0
	0.48148	0.48148	0.48148	0.48148	0.01852	0.11852
	0	0	0	0	0	0
	1	0.16667	0.16667	0	0	0
	0.81818	1.06818	1.06818	0.18182	0.31818	0.01818
	1.68182	1.01515	1.01515	0.31818	0.45455	0.08182
	0	0	0	0	0	0
	0	0	0	0	0	0
	0.96296	0.76296	0.76296	1.03704	1.03704	0.14815
	0.03704	0.03704	0.03704	0.03704	0.03704	0.03704
	0	0	0	0	0	0
	1.35294	0.35294	0.64706	0.36275	0.44706	0.31373
	0.91935	0.91935	0.24194	0.24194	0.24194	0.24194
	0.04615	0.04615	0.04615	0.04615	0.04615	0.04615
	1.04688	0.71354	0.17188	0.17188	0.17188	0.17188
	0.21538	0.21538	0.21538	0.21538	0.01538	0.01538
	0.68254	0.68254	1.33333	0.33333	0.33333	0.04921
	0.26154	0.13654	0.8	0.13333	0.2	0.13333
	0	0	0	0	0	0
	0.06897	0.5977	0.06897	0.06897	0.06897	0.06897
	0.06667	0.06667	0.06667	0.06667	0.06667	0.06667
	0.65217	0.65217	0.65217	0.86957	0.86957	0.06957
	0.53846	0.53846	0.53846	0.03846	0.12821	0.03846
	0	0	0	0	0	0
	0.01538	0.01538	0.01538	0.01538	0.01538	0.01538
	1.37313	1.15821	0.64179	0.37313	0.15821	0.04179
	0.58209	0.04291	0.58209	0.58209	0.38209	0.01791
	0.01429	0.01429	0.01429	0.01429	0.01429	0.01429
	0	0	0	0	0	0
	0.13846	0.15128	0.13846	0.13846	0.13846	0.13846
	0.06557	0.2	0.06557	0.06557	0.06557	0.06557
	0.9	0.6	0.21429	0.23333	0.1	0.11429
	0.39437	0.41901	0.39437	0.39437	0.19437	0.19437
	0.17857	0.92857	0.92857	0.17857	0.17857	0.19643
	0.02941	0.72059	0.02941	0.02941	0.02941	0.02941
	1.925	1.925	1.925	0.075	0.075	0.06786
	0.01408	0.01408	0.01408	0.01408	0.01408	0.01408
	0	0	0	0	0	0
	0.5	0.5	0.79412	0.46078	0.19412	0.2
	0.58824	0.58824	0.58824	0.2549	0.01176	0.08824
	0.02703	0.02703	0.02703	0.02703	0.02703	0.02703
	0	0	0	0	0	0
	0.44444	0.44444	0.44444	0.27778	0.11111	0.12698
	0.20513	0.37179	0.37179	0.29487	0.12821	0.06227
	0	0	0	0	0	0
	0	0	0	0	0	0
	0.35714	0.15714	0.15714	0.35714	0.35714	0.35714
	0.28571	0.28571	0.28571	0.28571	0.28571	0.08571
	1.35294	0.35294	0.64706	0.36275	0.44706	0.31373
	0	0	0	0	0	0
	0.04839	0.04839	0.04839	0.04839	0.04839	0.04839
	1.06154	1.06154	0.09231	0.09231	0.09231	0.09231
	0.21875	0.05208	0.21875	0.21875	0.01875	0.10764
	1.16923	0.8359	0.26154	0.26154	0.06154	0.15043
	0.30645	0.30645	0.30645	0.30645	0.30645	0.08423
	0.1875	0.17361	1.0625	0.39583	0.2625	0.1875
	0	1	1	0	0	0
	0	0	0	0	0	0
	1	0.66667	0	0	0	0
	0.29167	0.29167	0.29167	0.70833	0.20833	0.09167
	1.48148	1.48148	1.48148	0.51852	0.51852	0.18519
	0	0	0	0	0	0
	0	0	0	0	0	0
	0.56716	0.03284	0.56716	0.23383	0.03284	0.0995
	1.35821	0.69154	0.98507	0.98507	0.38507	0.09619
	0	0	0	0	0	0
	0	0	0	0	0	0
	0.07692	0.07692	0.07692	0.07692	0.07692	0.07692
	0	0.33333	0	0	0	0
	0.32857	0.25714	0.32857	0.32857	0.15714	0.09048
	0.88732	0.77934	0.28169	0.28169	0.28169	0.28169
	0.14286	0.48214	0.48214	0.14286	0.19048	0
	0.23529	0.77778	0.23529	0.23529	0.23529	0.12418
	1	1	1	0	0	0
	0	0	0	0	0	0
	0	0	0	0	0	0
	0.11765	0.11765	0.11765	0.11765	0.11765	0.11765
	0.71642	1.29851	0.71642	0.38308	0.30149	0.38308
	0	0.16667	0.16667	0	0	0
	0.04255	0.04255	0.04255	0.04255	0.04255	0.04255
	0.39474	0.39474	0.39474	0.10526	0.0614	0.03383
	0.21951	0.21951	0.21951	0.28049	0.11382	0.07666
	0	0	0	0	0	0
	0	0	0	0	0	0
	0.8	0.8	0.8	0.8	0.8	0.8
	0.16	0.16	0.16	0.16	0.16	0.16
	0.91935	0.91935	0.24194	0.24194	0.24194	0.24194
	0.04839	0.04839	0.04839	0.04839	0.04839	0.04839
	0	0	0	0	0	0
	1.40323	1.40323	0.59677	0.59677	0.59677	0.09677
	1.36508	1.36508	0.68254	0.68254	0.18254	0.33333
	0.82258	0.82258	0.17742	0.17742	0.07258	0.06631
	0.21667	0.21667	0.21667	0.21667	0.21667	0.21667
	0.30508	0.30508	0.30508	0.30508	0.05508	0.05508
	0	0	0	0	0	0
	0.65517	0.65517	0.65517	0.65517	0.32184	0.12808
	1	1	0.375	0.375	0.5	0.25
	0.81818	0.81818	0.81818	0.81818	0.81818	0.56818
	0.30435	0.69565	0.69565	0.30435	0.19565	0.10435
	0	0	0	0	0	0
	0	0	0	0	0	0
	0.40625	0.40625	0.40625	0.40625	0.21875	0.18403
	0.01562	0.01562	0.01562	0.01562	0.01562	0.01562
	0.70769	0.70769	0.29231	0.29231	0.29231	0.29231
	0.71875	0.71875	0.28125	0.21875	0.03125	0.17014
	0.18333	0.18333	0.18333	0.18333	0.18333	0.18333
	0.21053	0.21053	0.21053	0.21053	0.14474	0.09942
	0.84615	0.84615	0.24615	0.24615	0.24615	0.13504
	0.09091	0.09091	0.09091	0.09091	0.09091	0.09091
	0.94118	0.94118	0.94118	0.33333	0.33333	0.33333
	0.06349	0.06349	0.06349	0.06349	0.06349	0.06349
	2	2	2	2	0	0
	0	0	0	0	0	0
	0	0	0	0	0	0
	1.64062	1.64062	0.35938	0.35938	0.35938	0.13715
	0.68254	0.68254	0.31746	0.31746	0.06746	0.12698
	0.85294	0.85294	0.85294	0.32353	0.32353	0.18627
	0.65217	0.65217	0.65217	0.34783	0.34783	0.08075
	0.09091	0.09091	0.09091	0.09091	0.09091	0.09091
	0.08333	0.08333	0.08333	0.08333	0.08333	0.08333
	1	1	1	1	1	1
	0	0	0	0	0	0
	0.65385	0.65385	0.65385	0.65385	0.65385	0.42308
	0.53846	0.53846	0.53846	0.53846	0.69231	0.28846
	0.04615	0.04615	0.04615	0.04615	0.04615	0.04615
	1.06154	1.06154	0.09231	0.09231	0.09231	0.09231
	0.59677	0.59677	0.59677	0.59677	0.59677	0.09677
	0	0	0	0	0	0
	1.21875	1.21875	0.53125	0.53125	0.19792	0.15625
	1.35938	1.35938	0.57812	0.57812	0.39062	0.14062
	0.04918	0.04918	0.04918	0.04918	0.04918	0.04918
	0.1129	0.1129	0.1129	0.1129	0.1129	0.1129
	0	0	0	0	0	0
	0.60714	0.60714	0.60714	0.60714	0.89286	0.05952
	1.28571	1.28571	0.85714	0.85714	0.85714	0.52381
	0.31818	0.31818	0.31818	0.31818	0.31818	0.18182
	1.125	1.875	1.875	0.125	0.125	0.075
	0	0	0	0	0	0
	0	0	0	0	0	0
	0.19697	0.19697	0.19697	0.19697	0.19697	0.10985
	0.21212	0.21212	0.21212	0.21212	0.45455	0.03788
	0.41176	0.41176	0.58824	0.08824	0.07843	0.21324
	0.37313	0.37313	0.37313	0.37313	0.37313	0.00187
	0.03175	0.03175	0.03175	0.03175	0.03175	0.03175
	0	0	0	0	0	0
	0.13043	0.13043	0.13043	0.13043	0.13043	0.13043
	1.15942	1.15942	0.18841	0.18841	0.18841	0.06341
	0.28571	0.28571	0.28571	0.28571	0.28571	0
	0.19697	0.19697	0.19697	0.19697	0.19697	0.07197
	1	1	1	1	0	0
	0.26087	0.26087	0.26087	0.26087	0.26087	0.13587
	0.08824	0.08824	0.08824	0.08824	0.08824	0.05462
	0.57576	0.57576	0.42424	0.07576	0.24242	0.04924
	1.61538	1.61538	0.38462	0.11538	0.28205	0.11538
	0.54286	0.54286	0.54286	0.54286	0.54286	0.20952
	0.47826	0.47826	0.47826	0.47826	0.47826	0.04969
	0.08571	0.08571	0.08571	0.08571	0.08571	0.08571
	0.13158	0.13158	0.13158	0.13158	0.13158	0.13158
	0	0	0	0	0	0
	0.25	0.25	0.25	0.75	0.25	0.25
	0.79167	0.59167	0.59167	0.79167	0.79167	0.79167
	0.42857	0.42857	0.42857	0.42857	0.42857	0.17143
	1.04688	0.71354	0.17188	0.17188	0.17188	0.17188
	0.21875	0.05208	0.21875	0.21875	0.01875	0.10764
	1.34921	1.34921	0.68254	0.68254	0.18254	0.33333
	1.21875	1.21875	0.53125	0.53125	0.19792	0.15625
	0	0	0	0	0	0
	1.14286	0.90476	0.42857	0.42857	0.22857	0.32857
	0.11475	0.11475	0.11475	0.11475	0.11475	0.11475
	0.06557	0.06557	0.06557	0.06557	0.06557	0.06557
	0	0	0	0	0	0
	0.35714	0.95238	0.35714	0.35714	0.35714	0.08929
	0.5625	0.5625	0.5625	0.5625	0.22917	0.1625
	0.79167	0.29167	0.29167	0.79167	0.29167	0.09167
	0.84	0.84	0.84	0.16	0.16	0.16
	0	0	0	0	0	0
	0	0	0	0	0	0
	0.25758	0.35455	0.25758	0.28788	0.15455	0.15758
	0.13846	0.84872	0.13846	0.13846	0.13846	0.13846
	0.14925	0.14925	0.14925	0.14925	0.0806	0.0806
	0.22727	0.06061	0.22727	0.22727	0.02727	0.07273
	0.09677	0.2	0.09677	0.09677	0.09677	0.09677
	0.08621	0.08621	0.08621	0.08621	0.08621	0.08621
	1.08955	1.08955	0.23881	0.23881	0.23881	0.23881
	0.32353	0.15686	0.32353	0.32353	0.12353	0.02353
	1.4	0.9	0.9	0.47273	0.47273	0.22273
	0.4	0.4	0.4	0.4	0.2	0.1
	1.97368	1.97368	1.97368	0.02632	0.02632	0.02632
	0.88235	0.88235	0.11765	0.21569	0.08235	0.01765
	0.8806	0.8806	0.1194	0.21393	0.0806	0.00829
	1.81538	1.81538	0.18462	0.18462	0.18462	0.18462
	0.90625	0.90625	0.09375	0.09375	0.09375	0.09375
	0.97222	0.77222	0.77222	0.08333	0.08333	0.08333
	0.84783	0.34783	0.34783	0.15217	0.15217	0.15217
	0.22222	0.22222	0.22222	0.22222	0.22222	0.22222
	0.12821	0.37821	0.37821	0.12821	0.12821	0.12821
	1	1	1	1	1	1
	0.4	0.4	0.4	0.6	0.1	0.1
	0.52	0.52	0.52	0.52	0.52	0.52
	0.28	0.53333	0.53333	0.28	0.28	0.08
	0.21538	0.21538	0.21538	0.21538	0.01538	0.01538
	1.16923	0.8359	0.26154	0.26154	0.06154	0.15043
	0.82258	0.82258	0.17742	0.17742	0.07258	0.06631
	1.35938	1.35938	0.57812	0.57812	0.39062	0.14062
	1.14286	0.90476	0.42857	0.42857	0.22857	0.32857
	0	0	0	0	0	0
	0.29508	0.29508	0.29508	0.29508	0.09508	0.00492
	1.1129	0.77957	0.1129	0.1129	0.1129	0.03047
	0	0	0	0	0	0
	0.24138	0.24138	0.24138	0.24138	0.42241	0.13362
	0.78571	0.45238	0.35714	0.35714	0.11905	0.15714
	0.66667	0.66667	0.66667	0.33333	0.16667	0.13333
	1.75	1.75	1.75	0.25	0.08333	0.08333
	0	0	0	0	0	0
	0	0	0	0	0	0
	0.83824	0.83824	1.16176	0.16176	0.16176	0.16176
	0.5	0.97059	1.67647	0.67647	0.47647	0.09412
	0.04412	0.04412	0.04412	0.04412	0.04412	0.05588
	1.07463	0.07463	0.07463	0.07463	0.07463	0.07463
	0.04688	0.04688	0.04688	0.04688	0.04688	0.04688
	0.08475	0.58475	0.08475	0.08475	0.08475	0.01525
	0.35294	0.35294	0.35294	0.35294	0.15294	0.14706
	1.43478	1.43478	0.55072	0.55072	0.35072	0.16522
	0.61818	0.61818	0.61818	0.11818	0.28485	0.13182
	0.59701	1.20398	0.59701	0.59701	0.39701	0.09701
	1	1	1	0	0	0
	0.43478	0.43478	0.43478	0.43478	0.23478	0.03478
	0.47059	0.47059	0.47059	0.47059	0.07059	0.02614
	0.86364	0.86364	0.13636	0.13636	0.06364	0.03636
	1.87692	1.12308	0.12308	0.12308	0.12308	0.12308
	0.91176	0.41176	0.41176	0.08824	0.2451	0.05462
	1.86957	1.06957	1.06957	0.13043	0.2029	0.00543
	0.2	0.53333	0.53333	0.2	0.2	0.05714
	0.13514	0.63514	0.63514	0.13514	0.13514	0.13514
	0	0	0	0	0	0
	0	0	0	0	0	0
	1.16667	0.76667	0.76667	0.83333	0.83333	0.33333
	0.07407	0.16667	0.16667	0.07407	0.07407	0.07407
	0.68254	0.68254	1.33333	0.33333	0.33333	0.04921
	0.30645	0.30645	0.30645	0.30645	0.30645	0.08423
	0.21667	0.21667	0.21667	0.21667	0.21667	0.21667
	0.04918	0.04918	0.04918	0.04918	0.04918	0.04918
	0.11475	0.11475	0.11475	0.11475	0.11475	0.11475
	0.29508	0.29508	0.29508	0.29508	0.09508	0.00492
	0	0	0	0	0	0
	1.57377	0.69877	0.80328	0.24044	0.17377	0.0929
	0	1	1	0	0	0
	1.26667	0.4	0.4	0.76667	0.51667	0.14167
	0.94118	0.05882	0.05882	0.05882	0.05882	0.05882
	0.16667	0.16667	0.16667	0.16667	0.16667	0.16667
	0	0	0	0	0	0
	1	0	0	0	0	0
	0.01667	0.01667	0.01667	0.01667	0.01667	0.01667
	0.46875	0.93125	0.46875	0.46875	0.06875	0.25625
	0.57812	0.32812	0.57812	0.57812	0.37812	0.02187
	0.98462	0.10962	0.01538	0.01538	0.01538	0.01538
	0	0	0	0	0	0
	1.4127	1.24603	0.98413	0.65079	0.78413	0.38413
	0.66102	0.13898	0.66102	0.66102	0.26102	0.26102
	0.01538	0.23462	0.01538	0.01538	0.01538	0.01538
	0.07576	0.04924	0.07576	0.07576	0.07576	0.07576
	0.38889	0.85185	0.85185	0.64815	0.31481	0.13889
	0.01587	0.48413	0.01587	0.01587	0.01587	0.01587
	1.94872	1.94872	1.94872	0.05128	0.05128	0.05128
	0.98485	0.98485	0.01515	0.01515	0.01515	0.01515
	0	0	0	0	0	0
	0.36508	0.36508	0.36508	0.36508	0.06667	0.06667
	0	0	0	0	0	0
	0.64706	0.31373	0.31373	0.35294	0.35294	0.06723
	0	0	0	0	0	0
	1.15152	0.65152	0.65152	0.84848	0.51515	0.12121
	0.30556	0.30556	0.30556	0.69444	0.36111	0.01984
	0	0	0	0	0	0
	0	0	0	0	0	0
	0.75862	0.55862	0.55862	0.51724	0.51724	0.51724
	0.75	0.60714	0.60714	0.75	0.25	0.14286
	0.26154	0.13654	0.8	0.13333	0.2	0.13333
	0.1875	0.17361	1.0625	0.39583	0.2625	0.1875
	0.30508	0.30508	0.30508	0.30508	0.05508	0.05508
	0.1129	0.1129	0.1129	0.1129	0.1129	0.1129
	0.06557	0.06557	0.06557	0.06557	0.06557	0.06557
	1.1129	0.77957	0.1129	0.1129	0.1129	0.03047
	1.57377	0.69877	0.80328	0.24044	0.17377	0.0929
	0	0	0	0	0	0
	0	1	1	0	0	0
	0.32258	0.32258	0.32258	0.17742	0.17742	0.03687
	1.17647	0.17647	0.17647	0.17647	0.17647	0.17647
	0	0	0	0	0	0
	0.375	0.375	0.375	0.125	0.29167	0.025
	1.01695	0.05085	0.05085	0.05085	0.05085	0.09416
	0.03226	0.96774	0.03226	0.03226	0.03226	0.07885
	0.25	0.15	0.25	0.25	0.05	0.02778
	1.1875	0.63194	0.5	0.5	0.5	0.05556
	0.02985	0.02985	0.02985	0.02985	0.02985	0.02985
	1	0	0	0	0	0
	0.5625	0.41667	0.5625	0.58333	0.45	0.34028
	0.57143	1.73016	0.57143	0.57143	0.57143	0.2381
	0.10448	0.14552	0.10448	0.10448	0.09552	0.00663
	0.08824	0.08824	0.08824	0.08824	0.08824	0.08824
	0.07273	0.42727	0.42727	0.07273	0.26061	0.07013
	0.52308	0.92137	0.52308	0.18974	0.12308	0.07863
	0.84211	0.84211	0.84211	0.15789	0.15789	0.00877
	0	0	0	0	0	0
	0.01493	0.01493	0.01493	0.01493	0.01493	0.01493
	0	0	0	0	0	0
	0.44615	0.44615	0.55385	0.11282	0.15385	0.1094
	0	0	0	0	0	0
	0.85106	0.13678	0.13678	0.14894	0.14894	0.00608
	0.73529	0.90196	0.90196	0.26471	0.06863	0.23529
	0.67568	0.92278	0.92278	0.64865	0.31532	0.01802
	0	0	0	0	0	0
	0.66667	0.66667	0.66667	0.66667	0.16667	0.16667
	0	1	1	0	0	0
	0.17647	0.17647	0.17647	0.17647	0.17647	0.17647
	0	0	0	0	0	0
	0	1	1	0	0	0
	0	0	0	0	0	0
	0	0	0	0	0	0
	0	0	0	0	0	0
	0	0	0	0	0	0
	0	1	1	0	0	0
	0	1	1	0	0	0
	0	0	0	0	0	0
	0	0	0	0	0	0
	0	0	0	0	0	0
	0	0	0	0	0	0
	0	0	0	0	0	0
	1.125	1.125	1.125	0.375	0.29167	0.125
	1.2069	1.2069	1.2069	0.2069	0.2069	0.17241
	0	0	0	0	0	0
	0.03846	0.03846	0.03846	0.03846	0.03846	0.03846
	0.10714	0.89286	0.89286	0.10714	0.10714	0.10714
	0.62069	1.2069	1.2069	0.2931	0.45977	0.2931
	0	1	1	0	0	0
	0.16	0.16	0.16	0.58	0.41333	0.24667
	0	0	0	0	0	0
	0	0	0	0	0	0
	0	0	0	0	0	0
	0	0	0	0	0	0
	0	0	0	0	0	0
	0.41379	0.41379	0.41379	0.08621	0.08046	0.08046
	0.62069	0.62069	0.62069	0.5	0.66667	0.16667
	0	0	0	0	0	0
	0	0	0	0	0	0
	0	0	0	0	0	0
	0.25	0.25	0.25	0.25	0.41667	0.08333
	0	1	1	0	0	0
	0.34615	0.34615	0.34615	0.38462	0.55128	0.21795
	2	2	2	2	2	2
	0	0	0	0	0	0
	1	1	1	1	1	0.33333
	0.47059	0.52941	0.52941	0.47059	0.47059	0.07059
	0.06897	0.5977	0.06897	0.06897	0.06897	0.06897
	0	0	0	0	0	0
	0.65517	0.65517	0.65517	0.65517	0.32184	0.12808
	0.60714	0.60714	0.60714	0.60714	0.89286	0.05952
	0.35714	0.95238	0.35714	0.35714	0.35714	0.08929
	0.24138	0.24138	0.24138	0.24138	0.42241	0.13362
	1.26667	0.4	0.4	0.76667	0.51667	0.14167
	0.32258	0.32258	0.32258	0.17742	0.17742	0.03687
	0	0	0	0	0	0
	0	0	0	0	0	0
	0.875	0.875	0.625	0.625	0.625	0.425
	0.2	0.8	0.8	0.2	0.2	0.2
	0	0	0	0	0	0
	0	0	0	0	0	0
	0	0	0	0	0	0
	0.13793	0.86207	0.13793	0.13793	0.13793	0.13793
	0	0.33333	0	0	0	0
	0.9375	0.72917	0.5625	0.4375	0.6875	0.0625
	0.27273	0.39394	0.27273	0.27273	0.27273	0.10227
	0.33333	0.53333	0.86667	0.66667	0.16667	0.04167
	0.09677	0.09677	0.09677	0.09677	0.09677	0.09677
	0.0625	0.0625	0.0625	0.0625	0.0625	0.0625
	0	0	0	0	0	0
	0.19231	0.55128	0.55128	0.19231	0.19231	0.19231
	0.0303	0.0303	0.0303	0.0303	0.0303	0.0303
	1.52174	1.52174	1.52174	0.52174	0.18841	0.14493
	0.81818	0.81818	0.24242	0.31818	0.31818	0.06818
	0.03125	0.03125	0.03125	0.03125	0.03125	0.03125
	0.21212	0.21212	0.21212	0.21212	0.21212	0.21212
	0.12903	0.12903	0.12903	0.37097	0.37097	0.12097
	0.5	0.5	0.5	0.5	0.5	0.3
	0	0	0	0	0	0
	0.15	0.51667	0.51667	0.15	0.15	0.15
	0	0	0	0	0	0
	0	0	0	0	0	0
	1	1	1	0	0	0
	0.5	0.5	0.5	0.5	0.5	0
	1.1	0.9	0.9	0.3	0.3	0.3
	0.06667	0.06667	0.06667	0.06667	0.06667	0.06667
	1	0.66667	0	0	0	0
	1	1	0.375	0.375	0.5	0.25
	1.28571	1.28571	0.85714	0.85714	0.85714	0.52381
	0.5625	0.5625	0.5625	0.5625	0.22917	0.1625
	0.78571	0.45238	0.35714	0.35714	0.11905	0.15714
	0.94118	0.05882	0.05882	0.05882	0.05882	0.05882
	1.17647	0.17647	0.17647	0.17647	0.17647	0.17647
	0	0	0	0	0	0
	0.875	0.875	0.625	0.625	0.625	0.425
	0	0	0	0	0	0
	0	0	0	0	0	0
	0.875	0.875	0.875	0.125	0.125	0.125
	0	0	0	0	0	0
	0	0	0	0	0	0
	0.2	0.2	0.2	0.2	0.2	0.2
	0.86667	0.8	0.13333	0.13333	0.13333	0.13333
	0.52941	0.47059	0.47059	0.02941	0.19608	0.07059
	1.35294	0.64706	0.64706	0.14706	0.01961	0.04706
	0.0625	0.0625	0.0625	0.0625	0.0625	0.0625
	1	0.33333	0	0	0	0
	0.05882	0.05882	0.05882	0.05882	0.05882	0.05882
	1.05882	1.05882	0.17647	0.17647	0.17647	0.17647
	0.07692	0.07692	0.07692	0.07692	0.07692	0.07692
	1.0625	0.72917	0.1875	0.1875	0.1875	0.1875
	1	1	1	0	0	0
	0.11765	0.11765	0.11765	0.11765	0.11765	0.11765
	1	1	0	0	0	0
	0.17647	0.17647	0.17647	0.17647	0.15686	0.02353
	1.23529	1.23529	0.35294	0.26471	0.43137	0.16471
	0.2	0.2	0.2	0.2	0.2	0.2
	1.25	0.25	0.25	0.25	0.25	0.25
	0	0	0	0	0	0
	1	0.33333	0.33333	0	0	0
	0	0	0	0	0	0
	0	0	0	0	0	0
	0.53333	0.46667	0.46667	0.46667	0.46667	0.03333
	0	0	0	0	0	0
	0.65217	0.65217	0.65217	0.86957	0.86957	0.06957
	0.29167	0.29167	0.29167	0.70833	0.20833	0.09167
	0.81818	0.81818	0.81818	0.81818	0.81818	0.56818
	0.31818	0.31818	0.31818	0.31818	0.31818	0.18182
	0.79167	0.29167	0.29167	0.79167	0.29167	0.09167
	0.66667	0.66667	0.66667	0.33333	0.16667	0.13333
	0.16667	0.16667	0.16667	0.16667	0.16667	0.16667
	0	0	0	0	0	0
	0	0	0	0	0	0
	0.2	0.8	0.8	0.2	0.2	0.2
	0	0	0	0	0	0
	0	0	0	0	0	0
	1.04762	1.04762	1.04762	1.04762	0.54762	0.15238
	0	0	0	0	0	0
	0	0	0	0	0	0
	1	1	1	1	0.5	0.2
	0	0	0	0	0	0
	0	0	0	0	0	0
	0	0	0	0	0	0
	0.32	0.68	0.68	0.32	0.32	0.12
	0	0	0	0	0	0
	0.08333	0.91667	0.91667	0.08333	0.08333	0.08333
	0.04	0.04	0.04	0.04	0.04	0.04
	0.64	0.68	0.68	0.68	0.68	0.28
	0	0	0	0	0	0
	2	2	2	0	0	0
	0	0	0	0	0	0
	0	0	0	0	0	0
	0.83333	0.83333	0.83333	0.83333	0.41667	0.35
	0.52	0.52	0.52	0.52	0.06	0.24
	1.92	1	1	0.08	0.08	0.32
	0.84	0.84	0.84	0.16	0.16	0.24
	0.31818	0.31818	0.31818	0.31818	0.31818	0.08182
	0.12	0.12	0.12	0.12	0.12	0.12
	0	0	0	0	0	0
	0	0	0	0	0	0
	0	0	0	0	0	0
	0.33333	0.33333	0.33333	0.33333	0.16667	0.26667
	0.53846	0.53846	0.53846	0.03846	0.12821	0.03846
	1.48148	1.48148	1.48148	0.51852	0.51852	0.18519
	0.30435	0.69565	0.69565	0.30435	0.19565	0.10435
	1.125	1.875	1.875	0.125	0.125	0.075
	0.84	0.84	0.84	0.16	0.16	0.16
	1.75	1.75	1.75	0.25	0.08333	0.08333
	0	0	0	0	0	0
	0.375	0.375	0.375	0.125	0.29167	0.025
	0	0	0	0	0	0
	0	0	0	0	0	0
	0.875	0.875	0.875	0.125	0.125	0.125
	1.04762	1.04762	1.04762	1.04762	0.54762	0.15238
	0	0	0	0	0	0
	0.12	0.12	0.12	0.38	0.21333	0.04667
	0	0	0	0	0	0
	0.04167	0.04167	0.04167	0.04167	0.04167	0.04167
	0.92	0.92	0.92	0.08	0.08	0.08
	0	0	0	0	0	0
	0	0	0	0	0	0
	0	0	0	0	0	0
	0.17391	0.17391	0.17391	0.17391	0.17391	0.17391
	0.07407	0.07407	0.07407	0.07407	0.07407	0.07407
	1	1	1	0	0	0
	0	0	0	0	0	0
	0.42857	0.42857	0.42857	0.42857	0.09524	0.09524
	1	1	1	0	0	0
	0	0	0	0	0	0
	0	0	0	0	0	0
	1.03704	1.03704	1.03704	0.53704	0.37037	0.37037
	2.21429	2.21429	2.21429	0.35714	0.45238	0.21429
	0.89286	0.89286	0.89286	0.10714	0.22619	0.05952
	0.89286	0.89286	0.89286	0.10714	0.22619	0.05952
	0	0	0	0	0	0
	0	0	0	0	0	0
	1	1	1	1	1	1
	0.8	0.8	0.8	1	0.2	0.2
	1	1	1	0.16	0.16	0.16
	0.72	0.72	0.72	0.28	0.28	0.28
	0	0	0	0	0	0
	0	0	0	0	0	0
	0	0	0	0	0	0
	0	0	0	0	0	0
	0	0	0	0	0	0
	0	0	0	0	0	0
	1	0	0	0	0	0
	1.01695	0.05085	0.05085	0.05085	0.05085	0.09416
	1.125	1.125	1.125	0.375	0.29167	0.125
	0	0	0	0	0	0
	0	0	0	0	0	0
	0	0	0	0	0	0
	0.12	0.12	0.12	0.38	0.21333	0.04667
	0	0	0	0	0	0
	0.96721	0.96721	1.03279	0.69945	0.23279	0.13279
	0	0	0	0	0	0
	0.01587	0.01587	0.01587	0.01587	0.01587	0.01587
	0.78462	0.78462	0.78462	0.11795	0.10769	0.08462
	0.92188	0.92188	0.92188	0.21354	0.27813	0.27813
	1	0	0	0	0	0
	1.05	0.15	0.15	0.28333	0.35	0.25
	0	0	0	0	0	0
	0	0	0	0	0	0
	0	0	0	0	0	0
	0.09524	0.09524	0.09524	0.2381	0.10476	0.10476
	0	0	0	0	0	0
	0.68182	0.68182	0.68182	0.13636	0.08182	0.08182
	0.92308	0.92308	1.36923	0.41026	0.47692	0.29915
	0	0	0	0	0	0
	0	0	0	0	0	0
	0	0	0	0	0	0
	0.25532	0.25532	0.25532	0.24468	0.41135	0.24468
	1	1	1	0	0	0
	1.24324	1.24324	1.24324	0.25676	0.42342	0.32819
	0	0	0	0	0	0
	0.66667	0.66667	0.66667	0.66667	0.33333	0.33333
	0	0.5	0.5	0	0	0
	0.22222	1.27778	1.27778	0.22222	0.22222	0.22222
	0.01538	0.01538	0.01538	0.01538	0.01538	0.01538
	0	0	0	0	0	0
	0	0	0	0	0	0
	0	0	0	0	0	0
	0	0	0	0	0	0
	0	0	0	0	0	0
	0.01667	0.01667	0.01667	0.01667	0.01667	0.01667
	0.03226	0.96774	0.03226	0.03226	0.03226	0.07885
	1.2069	1.2069	1.2069	0.2069	0.2069	0.17241
	0	0	0	0	0	0
	0	0	0	0	0	0
	0	0	0	0	0	0
	0	0	0	0	0	0
	0.96721	0.96721	1.03279	0.69945	0.23279	0.13279
	0	0	0	0	0	0
	0	0	0	0	0	0
	0.01538	0.98462	0.01538	0.01538	0.01538	0.01538
	0.91176	0.91176	0.91176	0.2451	0.11176	0.01176
	0.95522	1.09701	0.95522	0.26368	0.24478	0.34478
	0.01587	1.01587	0.01587	0.01587	0.01587	0.01587
	0.1	1	0.1	0.33333	0.2	0.2
	0	0	0	0	0	0
	0	0	0	0	0	0
	0	0	0	0	0	0
	0	0.5	0	0	0	0
	0.07143	0.07143	0.07143	0.07143	0.07143	0.07143
	0.6087	0.6087	0.6087	0.05797	0.0087	0.0087
	0.86765	0.86765	1.42647	0.46569	0.33235	0.24346
	0	0	0	0	0	0
	0	0	0	0	0	0
	0	0	0	0	0	0
	0.2	0.8	0.8	0.3	0.46667	0.175
	1	1.5	1.5	0	0	0
	1.15385	0.84615	0.84615	0.34615	0.51282	0.27473
	1	1	1	1	1	1
	0.2	0.2	0.2	0.2	0.2	0.2
	0.92	0.62	0.62	1.12	1.12	0.16
	0.11111	0.11111	0.11111	0.11111	0.38889	0.08889
	1.37313	1.15821	0.64179	0.37313	0.15821	0.04179
	0.56716	0.03284	0.56716	0.23383	0.03284	0.0995
	0.40625	0.40625	0.40625	0.40625	0.21875	0.18403
	0.19697	0.19697	0.19697	0.19697	0.19697	0.10985
	0.25758	0.35455	0.25758	0.28788	0.15455	0.15758
	0.83824	0.83824	1.16176	0.16176	0.16176	0.16176
	0.46875	0.93125	0.46875	0.46875	0.06875	0.25625
	0.25	0.15	0.25	0.25	0.05	0.02778
	0	0	0	0	0	0
	0.13793	0.86207	0.13793	0.13793	0.13793	0.13793
	0.2	0.2	0.2	0.2	0.2	0.2
	1	1	1	1	0.5	0.2
	0.04167	0.04167	0.04167	0.04167	0.04167	0.04167
	0	0	0	0	0	0
	0	0	0	0	0	0
	0	0	0	0	0	0
	1.14286	0.8	0.6	0.52381	0.25714	0.2
	1.02857	0.62857	0.02857	0.02857	0.02857	0.07143
	0.07246	0.07246	0.07246	0.07246	0.07246	0.02754
	0.18462	1.03077	0.18462	0.18462	0.18462	0.18462
	0.14754	0.18579	0.14754	0.14754	0.14754	0.04754
	1.52857	0.92857	0.92857	0.19524	0.07143	0.17143
	0.78873	0.18873	0.78873	0.12207	0.01127	0.11127
	1.69643	1.09643	1.09643	0.30357	0.30357	0.30357
	0.77941	0.17941	0.77941	0.11275	0.02059	0.12059
	2	2	2	0	0	0
	0.57746	0.57746	0.57746	0.24413	0.17746	0.12254
	0.7	0.7	0.7	0.36667	0.1	0.07778
	0.88235	0.88235	0.26471	0.21569	0.08235	0.16471
	0.0597	0.0597	0.0597	0.0597	0.0597	0.0597
	1.88571	0.69286	0.69286	0.11429	0.11429	0.11429
	0.97872	0.02128	0.02128	0.02128	0.02128	0.02128
	0.45714	1.08571	1.08571	0.21429	0.12381	0.17143
	0.21053	0.21053	0.21053	0.21053	0.21053	0.06767
	1	1	1	1	1	1
	0.2	0.2	0.2	0.8	0.3	0.3
	0.64	0.44	0.44	0.64	0.64	0.14
	0.03846	0.81868	0.81868	0.03846	0.03846	0.03846
	0.58209	0.04291	0.58209	0.58209	0.38209	0.01791
	1.35821	0.69154	0.98507	0.98507	0.38507	0.09619
	0.01562	0.01562	0.01562	0.01562	0.01562	0.01562
	0.21212	0.21212	0.21212	0.21212	0.45455	0.03788
	0.13846	0.84872	0.13846	0.13846	0.13846	0.13846
	0.5	0.97059	1.67647	0.67647	0.47647	0.09412
	0.57812	0.32812	0.57812	0.57812	0.37812	0.02187
	1.1875	0.63194	0.5	0.5	0.5	0.05556
	0.03846	0.03846	0.03846	0.03846	0.03846	0.03846
	0	0.33333	0	0	0	0
	0.86667	0.8	0.13333	0.13333	0.13333	0.13333
	0	0	0	0	0	0
	0.92	0.92	0.92	0.08	0.08	0.08
	0.01587	0.01587	0.01587	0.01587	0.01587	0.01587
	0.01538	0.98462	0.01538	0.01538	0.01538	0.01538
	0.85714	0.8	0.6	0.52381	0.25714	0.2
	0	0	0	0	0	0
	0.02857	0.02857	0.02857	0.02857	0.02857	0.02857
	1.01449	0.34783	0.04348	0.04348	0.04348	0.04348
	0.33846	0.17179	0.33846	0.33846	0.33846	0.03846
	0.40323	1.17204	0.40323	0.40323	0.40323	0.06129
	0.8	0.425	0.8	0.46667	0.4	0.1
	1.40845	0.74178	0.59155	0.59155	0.39155	0.29155
	0.83929	0.58929	0.58929	0.16071	0.17262	0.03571
	1.02941	1.32026	0.23529	0.23529	0.23529	0.23529
	0.84615	0.84615	0.84615	0.15385	0.15385	0.01099
	0.23944	0.23944	0.23944	0.23944	0.03944	0.08873
	0.27143	0.27143	0.27143	0.27143	0.07143	0.04921
	0	0	0	0	0	0
	0.80882	0.80882	0.19118	0.19118	0.19118	0.19118
	1	0	0	0	0	0
	1.97917	0.69345	0.69345	0.02083	0.02083	0.02083
	0.51429	0.68095	0.68095	0.51429	0.51429	0.08571
	1.52632	1.09774	1.09774	0.52632	0.52632	0.04511
	1	1	1	1	1	1
	0.8	0.8	0.8	0.8	0.3	0.3
	1.55172	0.24828	0.24828	0.82759	0.82759	0.32759
	0.53571	0.53571	0.53571	0.53571	0.46429	0.36429
	0.01429	0.01429	0.01429	0.01429	0.01429	0.01429
	0	0	0	0	0	0
	0.70769	0.70769	0.29231	0.29231	0.29231	0.29231
	0.41176	0.41176	0.58824	0.08824	0.07843	0.21324
	0.14925	0.14925	0.14925	0.14925	0.0806	0.0806
	0.04412	0.04412	0.04412	0.04412	0.04412	0.05588
	0.98462	0.10962	0.01538	0.01538	0.01538	0.01538
	0.02985	0.02985	0.02985	0.02985	0.02985	0.02985
	0.10714	0.89286	0.89286	0.10714	0.10714	0.10714
	0.9375	0.72917	0.5625	0.4375	0.6875	0.0625
	0.52941	0.47059	0.47059	0.02941	0.19608	0.07059
	0	0	0	0	0	0
	0	0	0	0	0	0
	0.78462	0.78462	0.78462	0.11795	0.10769	0.08462
	0.91176	0.91176	0.91176	0.2451	0.11176	0.01176
	1.02857	0.62857	0.02857	0.02857	0.02857	0.07143
	0.02857	0.02857	0.02857	0.02857	0.02857	0.02857
	0	0	0	0	0	0
	0.40278	0.59722	1.59722	0.59722	0.39722	0.39722
	0.98529	0.01471	0.01471	0.01471	0.01471	0.01471
	0	0	0	0	0	0
	0	0	0	0	0	0
	0	0	0	0	0	0
	0	0	0	0	0	0
	0	0	0	0	0	0
	0.71429	0.71429	0.71429	0.71429	0.38095	0.04762
	0.22973	0.22973	0.7973	0.13063	0.02973	0.1027
	0	0	0	0	0	0
	0.04225	0.04225	0.04225	0.04225	0.04225	0.04225
	0	0	0	0	0	0
	0.07895	0.42105	0.42105	0.07895	0.07895	0.07895
	0	0	0	0	0	0
	1.92105	0.42105	0.42105	0.07895	0.07895	0.07895
	1	0.42857	0.42857	0	0	0
	1	1	1	1	1	1
	1	1	1	1.6	0.6	0.6
	0.82759	0.24828	0.24828	0.82759	0.82759	0.32759
	1.48276	0.58621	0.58621	0.48276	0.08621	0.08276
	0	0	0	0	0	0
	0	0	0	0	0	0
	0.71875	0.71875	0.28125	0.21875	0.03125	0.17014
	0.37313	0.37313	0.37313	0.37313	0.37313	0.00187
	0.22727	0.06061	0.22727	0.22727	0.02727	0.07273
	1.07463	0.07463	0.07463	0.07463	0.07463	0.07463
	0	0	0	0	0	0
	1	0	0	0	0	0
	0.62069	1.2069	1.2069	0.2931	0.45977	0.2931
	0.27273	0.39394	0.27273	0.27273	0.27273	0.10227
	1.35294	0.64706	0.64706	0.14706	0.01961	0.04706
	0	0	0	0	0	0
	0	0	0	0	0	0
	0.92188	0.92188	0.92188	0.21354	0.27813	0.27813
	0.95522	1.09701	0.95522	0.26368	0.24478	0.34478
	0.07246	0.07246	0.07246	0.07246	0.07246	0.02754
	1.01449	0.34783	0.04348	0.04348	0.04348	0.04348
	0.40278	0.59722	1.59722	0.59722	0.39722	0.39722
	0	0	0	0	0	0
	0	0	0	0	0	0
	1	0	0	0	0	0
	0	0	0	0	0	0
	0	0	0	0	0	0
	0	0	0	0	0	0
	1	0	0	0	0	0
	0.16279	0.16279	0.16279	0.16279	0.16279	0.16279
	0.13699	0.13699	0.13699	0.13699	0.13699	0.03699
	0.44444	0.44444	0.44444	0.44444	0.24444	0.11111
	0	0	0	0	0	0
	0	0	0	0	0	0
	0	0	0	0	0	0
	0.93878	0.08163	0.08163	0.06122	0.27211	0.06378
	1	0.5	0.5	0	0	0
	1.92857	0.5	0.5	0.42857	0.2619	0.07143
	0	0	0	0	0	0
	0	0	0	0	0	0
	1.53571	0.78571	0.78571	0.46429	0.46429	0.53571
	0.18519	0.56481	0.56481	0.18519	0.31481	0.01481
	0.13846	0.15128	0.13846	0.13846	0.13846	0.13846
	0.07692	0.07692	0.07692	0.07692	0.07692	0.07692
	0.18333	0.18333	0.18333	0.18333	0.18333	0.18333
	0.03175	0.03175	0.03175	0.03175	0.03175	0.03175
	0.09677	0.2	0.09677	0.09677	0.09677	0.09677
	0.04688	0.04688	0.04688	0.04688	0.04688	0.04688
	1.4127	1.24603	0.98413	0.65079	0.78413	0.38413
	0.5625	0.41667	0.5625	0.58333	0.45	0.34028
	0	1	1	0	0	0
	0.33333	0.53333	0.86667	0.66667	0.16667	0.04167
	0.0625	0.0625	0.0625	0.0625	0.0625	0.0625
	0.32	0.68	0.68	0.32	0.32	0.12
	0	0	0	0	0	0
	1	0	0	0	0	0
	0.01587	1.01587	0.01587	0.01587	0.01587	0.01587
	0.18462	1.03077	0.18462	0.18462	0.18462	0.18462
	0.33846	0.17179	0.33846	0.33846	0.33846	0.03846
	0.98529	0.01471	0.01471	0.01471	0.01471	0.01471
	0	0	0	0	0	0
	0	0	0	0	0	0
	1.03226	0.46774	0.83871	0.50538	0.23871	0.13871
	0	0.16667	0	0	0	0
	0.01449	0.01449	0.01449	0.01449	0.01449	0.01449
	0.2807	0.2193	0.2193	0.2193	0.05263	0.1557
	0	0	0	0	0	0
	1.7619	1.7619	1.7619	0.2381	0.38095	0.04762
	0.98551	0.98551	0.01449	0.01449	0.01449	0.01449
	0	0	0	0	0	0
	0.16667	0.16667	0.16667	0.16667	0.16667	0.16667
	0.0303	0.0303	0.0303	0.0303	0.0303	0.0303
	0.54054	0.45946	0.45946	0.04054	0.20721	0.11197
	0	0	0	0	0	0
	1.47222	0.99444	0.99444	0.52778	0.19444	0.18651
	0.5641	0.5641	0.5641	0.4359	0.4359	0.29304
	0	0	0	0	0	0
	0.25	0.25	0.25	0.75	0.25	0.25
	0.65385	0.15385	0.15385	0.34615	0.34615	0.34615
	1.08	1.76	1.76	0.24	0.42	0.12
	0.06557	0.2	0.06557	0.06557	0.06557	0.06557
	0	0.33333	0	0	0	0
	0.21053	0.21053	0.21053	0.21053	0.14474	0.09942
	0	0	0	0	0	0
	0.08621	0.08621	0.08621	0.08621	0.08621	0.08621
	0.08475	0.58475	0.08475	0.08475	0.08475	0.01525
	0.66102	0.13898	0.66102	0.66102	0.26102	0.26102
	0.57143	1.73016	0.57143	0.57143	0.57143	0.2381
	0.16	0.16	0.16	0.58	0.41333	0.24667
	0.09677	0.09677	0.09677	0.09677	0.09677	0.09677
	1	0.33333	0	0	0	0
	0	0	0	0	0	0
	0.17391	0.17391	0.17391	0.17391	0.17391	0.17391
	1.05	0.15	0.15	0.28333	0.35	0.25
	0.1	1	0.1	0.33333	0.2	0.2
	0.14754	0.18579	0.14754	0.14754	0.14754	0.04754
	0.40323	1.17204	0.40323	0.40323	0.40323	0.06129
	0	0	0	0	0	0
	1	0	0	0	0	0
	1.03226	0.46774	0.83871	0.50538	0.23871	0.13871
	0	0	0	0	0	0
	0	0	0	0	0	0
	0.03077	0.1359	0.03077	0.03077	0.03077	0.03077
	0	0.4	0.4	0	0	0
	0.32258	0.17742	0.32258	0.32258	0.32258	0.22258
	0.86111	0.86111	0.86111	0.13889	0.13889	0.00397
	0	0	0	0	0	0
	0.98438	0.98438	0.01562	0.01562	0.01562	0.09549
	0	0	0	0	0	0
	0.14286	0.14286	0.14286	0.14286	0.14286	0.14286
	0	0	0	0	0	0
	0.88889	0.11111	0.11111	0.11111	0.11111	0.01389
	0.80645	0.80645	0.80645	0.19355	0.13978	0.09217
	1.37143	0.82857	0.82857	0.67143	0.17143	0.22857
	0	0	0	0	0	0
	0	0	0	0	0	0
	0.85714	0.85714	0.85714	0.71429	0.71429	0.35714
	0	0	0	0	0	0
	0.9	0.6	0.21429	0.23333	0.1	0.11429
	0.32857	0.25714	0.32857	0.32857	0.15714	0.09048
	0.84615	0.84615	0.24615	0.24615	0.24615	0.13504
	0.13043	0.13043	0.13043	0.13043	0.13043	0.13043
	1.08955	1.08955	0.23881	0.23881	0.23881	0.23881
	0.35294	0.35294	0.35294	0.35294	0.15294	0.14706
	0.01538	0.23462	0.01538	0.01538	0.01538	0.01538
	0.10448	0.14552	0.10448	0.10448	0.09552	0.00663
	0	0	0	0	0	0
	0.0625	0.0625	0.0625	0.0625	0.0625	0.0625
	0.05882	0.05882	0.05882	0.05882	0.05882	0.05882
	0.08333	0.91667	0.91667	0.08333	0.08333	0.08333
	0.07407	0.07407	0.07407	0.07407	0.07407	0.07407
	0	0	0	0	0	0
	0	0	0	0	0	0
	1.52857	0.92857	0.92857	0.19524	0.07143	0.17143
	0.8	0.425	0.8	0.46667	0.4	0.1
	0	0	0	0	0	0
	0	0	0	0	0	0
	0	0.16667	0	0	0	0
	0	0	0	0	0	0
	0	0	0	0	0	0
	1.35135	0.60135	0.64865	0.31532	0.44865	0.34865
	0.94915	0.69915	0.69915	0.05085	0.28249	0.07415
	0.87324	0.24824	0.21127	0.21127	0.21127	0.11127
	2	2	2	0	0	0
	0	0	0	0	0	0
	0	0	0	0	0	0
	1.19718	1.19718	0.3662	0.13615	0.1662	0.2662
	0.95714	0.95714	0.04286	0.04286	0.04286	0.05714
	0	0	0	0	0	0
	0	0	0	0	0	0
	0	0	0	0	0	0
	0.14634	0.14634	0.14634	0.14634	0.14634	0.14634
	0	0	0	0	0	0
	0	0	0	0	0	0
	0.24138	0.04138	0.04138	0.24138	0.24138	0.24138
	0.24138	0.38424	0.38424	0.24138	0.25862	0.04138
	0.39437	0.41901	0.39437	0.39437	0.19437	0.19437
	0.88732	0.77934	0.28169	0.28169	0.28169	0.28169
	0.09091	0.09091	0.09091	0.09091	0.09091	0.09091
	1.15942	1.15942	0.18841	0.18841	0.18841	0.06341
	0.32353	0.15686	0.32353	0.32353	0.12353	0.02353
	1.43478	1.43478	0.55072	0.55072	0.35072	0.16522
	0.07576	0.04924	0.07576	0.07576	0.07576	0.07576
	0.08824	0.08824	0.08824	0.08824	0.08824	0.08824
	0	0	0	0	0	0
	0	0	0	0	0	0
	1.05882	1.05882	0.17647	0.17647	0.17647	0.17647
	0.04	0.04	0.04	0.04	0.04	0.04
	1	1	1	0	0	0
	0	0	0	0	0	0
	0	0	0	0	0	0
	0.78873	0.18873	0.78873	0.12207	0.01127	0.11127
	1.40845	0.74178	0.59155	0.59155	0.39155	0.29155
	0	0	0	0	0	0
	0	0	0	0	0	0
	0.01449	0.01449	0.01449	0.01449	0.01449	0.01449
	0.03077	0.1359	0.03077	0.03077	0.03077	0.03077
	1.35135	0.60135	0.64865	0.31532	0.44865	0.34865
	0	0	0	0	0	0
	0.85	0.475	0.475	0.15	0.18333	0.225
	0.75	0.63889	0.25	0.25	0.15	0.15
	1	1	1	0	0	0
	0	0	0	0	0	0
	0	0	0	0	0	0
	0.48611	0.48611	0.48611	0.18056	0.08611	0.08611
	1	0.11268	0.11268	0.11268	0.11268	0.2
	0.05128	0.11538	0.11538	0.05128	0.05128	0.05128
	0.03922	0.03922	0.03922	0.03922	0.03922	0.03922
	0	0	0	0	0	0
	0.07143	0.07143	0.07143	0.07143	0.07143	0.07143
	0	0	0	0	0	0
	0	0	0	0	0	0
	0.66667	0.46667	0.46667	0.62963	0.62963	0.16667
	0	0.33333	0.33333	0	0	0
	0.17857	0.92857	0.92857	0.17857	0.17857	0.19643
	0.14286	0.48214	0.48214	0.14286	0.19048	0
	0.94118	0.94118	0.94118	0.33333	0.33333	0.33333
	0.28571	0.28571	0.28571	0.28571	0.28571	0
	1.4	0.9	0.9	0.47273	0.47273	0.22273
	0.61818	0.61818	0.61818	0.11818	0.28485	0.13182
	0.38889	0.85185	0.85185	0.64815	0.31481	0.13889
	0.07273	0.42727	0.42727	0.07273	0.26061	0.07013
	0	0	0	0	0	0
	0.19231	0.55128	0.55128	0.19231	0.19231	0.19231
	0.07692	0.07692	0.07692	0.07692	0.07692	0.07692
	0.64	0.68	0.68	0.68	0.68	0.28
	0	0	0	0	0	0
	0	0	0	0	0	0
	0	0	0	0	0	0
	1.69643	1.09643	1.09643	0.30357	0.30357	0.30357
	0.83929	0.58929	0.58929	0.16071	0.17262	0.03571
	0	0	0	0	0	0
	0	0	0	0	0	0
	0.2807	0.2193	0.2193	0.2193	0.05263	0.1557
	0	0.4	0.4	0	0	0
	0.94915	0.69915	0.69915	0.05085	0.28249	0.07415
	0.85	0.475	0.475	0.15	0.18333	0.225
	0	0	0	0	0	0
	1	0.38816	0.38816	1	0.33333	0.23684
	2	2	2	0	0	0
	0	0	0	0	0	0
	0	0	0	0	0	0
	0.49123	0.49123	0.49123	0.49123	0.15789	0.16886
	0	0	0	0	0	0
	0	0	0	0	0	0
	0	0	0	0	0	0
	0	0.16667	0.16667	0	0	0
	0	0.16667	0.16667	0	0	0
	0	0	0	0	0	0
	0	0	0	0	0	0
	0.22222	0.02222	0.02222	0.22222	0.22222	0.22222
	0.42857	0.71429	0.71429	0.42857	0.07143	0.17143
	0.02941	0.72059	0.02941	0.02941	0.02941	0.02941
	0.23529	0.77778	0.23529	0.23529	0.23529	0.12418
	0.06349	0.06349	0.06349	0.06349	0.06349	0.06349
	0.19697	0.19697	0.19697	0.19697	0.19697	0.07197
	0.4	0.4	0.4	0.4	0.2	0.1
	0.59701	1.20398	0.59701	0.59701	0.39701	0.09701
	0.01587	0.48413	0.01587	0.01587	0.01587	0.01587
	0.52308	0.92137	0.52308	0.18974	0.12308	0.07863
	0	0	0	0	0	0
	0.0303	0.0303	0.0303	0.0303	0.0303	0.0303
	1.0625	0.72917	0.1875	0.1875	0.1875	0.1875
	0	0	0	0	0	0
	0.42857	0.42857	0.42857	0.42857	0.09524	0.09524
	0.09524	0.09524	0.09524	0.2381	0.10476	0.10476
	0	0.5	0	0	0	0
	0.77941	0.17941	0.77941	0.11275	0.02059	0.12059
	1.02941	1.32026	0.23529	0.23529	0.23529	0.23529
	0	0	0	0	0	0
	1	0	0	0	0	0
	0	0	0	0	0	0
	0.32258	0.17742	0.32258	0.32258	0.32258	0.22258
	0.87324	0.24824	0.21127	0.21127	0.21127	0.11127
	0.75	0.63889	0.25	0.25	0.15	0.15
	1	0.38816	0.38816	1	0.33333	0.23684
	0	0	0	0	0	0
	1	1	1	0	0	0
	0	0	0	0	0	0
	0	0	0	0	0	0
	0.01449	0.01449	0.01449	0.01449	0.01449	0.01449
	0.39706	0.39706	0.60294	0.06373	0.20294	0.00294
	0	0	0	0	0	0
	1	0	0	0	0	0
	0.07692	0.24359	0.24359	0.07692	0.07692	0.06593
	1	0	0	0	0	0
	0	0	0	0	0	0
	0	0	0	0	0	0
	1.80952	1.80952	1.80952	0.19048	0.19048	0.19048
	0.66667	0.66667	0.66667	0.66667	0.16667	0.06667
	1.925	1.925	1.925	0.075	0.075	0.06786
	1	1	1	0	0	0
	2	2	2	2	0	0
	1	1	1	1	0	0
	1.97368	1.97368	1.97368	0.02632	0.02632	0.02632
	1	1	1	0	0	0
	1.94872	1.94872	1.94872	0.05128	0.05128	0.05128
	0.84211	0.84211	0.84211	0.15789	0.15789	0.00877
	0	0	0	0	0	0
	1.52174	1.52174	1.52174	0.52174	0.18841	0.14493
	1	1	1	0	0	0
	2	2	2	0	0	0
	1	1	1	0	0	0
	0	0	0	0	0	0
	0.07143	0.07143	0.07143	0.07143	0.07143	0.07143
	2	2	2	0	0	0
	0.84615	0.84615	0.84615	0.15385	0.15385	0.01099
	0.71429	0.71429	0.71429	0.71429	0.38095	0.04762
	0.16279	0.16279	0.16279	0.16279	0.16279	0.16279
	1.7619	1.7619	1.7619	0.2381	0.38095	0.04762
	0.86111	0.86111	0.86111	0.13889	0.13889	0.00397
	2	2	2	0	0	0
	1	1	1	0	0	0
	2	2	2	0	0	0
	1	1	1	0	0	0
	0	0	0	0	0	0
	0.48837	0.48837	0.48837	0.48837	0.15504	0.07973
	0.06977	0.06977	0.06977	0.06977	0.06977	0.06977
	1.92857	1.92857	1.92857	0.07143	0.2619	0.07143
	1	1	1	0	0	0
	1.80645	1.80645	1.80645	0.80645	0.30645	0.02688
	1	1	1	0	0	0
	1.82353	1.82353	1.82353	0.17647	0.17647	0.16667
	0.81818	0.81818	0.81818	0.18182	0.18182	0.01515
	1	1	1	1	1	1
	0.8	0.8	0.8	0.8	0.3	0.3
	0.86207	0.86207	0.86207	0.13793	0.13793	0.13793
	0.10345	0.10345	0.10345	0.10345	0.10345	0.10345
	0.01408	0.01408	0.01408	0.01408	0.01408	0.01408
	0	0	0	0	0	0
	0	0	0	0	0	0
	0.26087	0.26087	0.26087	0.26087	0.26087	0.13587
	0.88235	0.88235	0.11765	0.21569	0.08235	0.01765
	0.43478	0.43478	0.43478	0.43478	0.23478	0.03478
	0.98485	0.98485	0.01515	0.01515	0.01515	0.01515
	0	0	0	0	0	0
	0.41379	0.41379	0.41379	0.08621	0.08046	0.08046
	0.81818	0.81818	0.24242	0.31818	0.31818	0.06818
	0.11765	0.11765	0.11765	0.11765	0.11765	0.11765
	0	0	0	0	0	0
	0	0	0	0	0	0
	0.68182	0.68182	0.68182	0.13636	0.08182	0.08182
	0.6087	0.6087	0.6087	0.05797	0.0087	0.0087
	0.57746	0.57746	0.57746	0.24413	0.17746	0.12254
	0.23944	0.23944	0.23944	0.23944	0.03944	0.08873
	0.22973	0.22973	0.7973	0.13063	0.02973	0.1027
	0.13699	0.13699	0.13699	0.13699	0.13699	0.03699
	0.98551	0.98551	0.01449	0.01449	0.01449	0.01449
	0	0	0	0	0	0
	0	0	0	0	0	0
	0	0	0	0	0	0
	0	0	0	0	0	0
	0	0	0	0	0	0
	0.48837	0.48837	0.48837	0.48837	0.15504	0.07973
	0	0	0	0	0	0
	1.10811	1.10811	1.27027	0.6036	0.47027	0.49249
	0	0	0	0	0	0
	0	0	0	0	0	0
	0.07692	0.07692	0.07692	0.07692	0.07692	0.07692
	0	0	0	0	0	0
	0	0	0	0	0	0
	0	0	0	0	0	0
	1	1	1	1	1	1
	1.4	1.4	1.4	1.2	0.4	0.4
	0	0	0	0	0	0
	1	1	1	0	0	0
	0	0	0	0	0	0
	0	0	0	0	0	0
	0	0	0	0	0	0
	0.08824	0.08824	0.08824	0.08824	0.08824	0.05462
	0.8806	0.8806	0.1194	0.21393	0.0806	0.00829
	0.47059	0.47059	0.47059	0.47059	0.07059	0.02614
	0	0	0	0	0	0
	0.01493	0.01493	0.01493	0.01493	0.01493	0.01493
	0.62069	0.62069	0.62069	0.5	0.66667	0.16667
	0.03125	0.03125	0.03125	0.03125	0.03125	0.03125
	1	1	0	0	0	0
	0	0	0	0	0	0
	0	0	0	0	0	0
	0.92308	0.92308	1.36923	0.41026	0.47692	0.29915
	0.86765	0.86765	1.42647	0.46569	0.33235	0.24346
	0.7	0.7	0.7	0.36667	0.1	0.07778
	0.27143	0.27143	0.27143	0.27143	0.07143	0.04921
	0	0	0	0	0	0
	0.44444	0.44444	0.44444	0.44444	0.24444	0.11111
	0	0	0	0	0	0
	0.98438	0.98438	0.01562	0.01562	0.01562	0.09549
	0	0	0	0	0	0
	0	0	0	0	0	0
	0	0	0	0	0	0
	0	0	0	0	0	0
	0.06977	0.06977	0.06977	0.06977	0.06977	0.06977
	0.89189	0.89189	1.27027	0.6036	0.47027	0.49249
	0	0	0	0	0	0
	0	0	0	0	0	0
	0	0	0	0	0	0
	0	0	0	0	0	0
	0.1	0.1	0.1	0.1	0.23333	0.18571
	0	0	0	0	0	0
	0.19048	0.19048	0.19048	0.30952	0.47619	0.2381
	0	0	0	0	0	0
	0	0	0	0	0	0
	0.61538	0.61538	0.61538	0.38462	0.38462	0.11538
	0	0	0	0	0	0
	0.5	0.5	0.79412	0.46078	0.19412	0.2
	0.11765	0.11765	0.11765	0.11765	0.11765	0.11765
	1.64062	1.64062	0.35938	0.35938	0.35938	0.13715
	0.57576	0.57576	0.42424	0.07576	0.24242	0.04924
	1.81538	1.81538	0.18462	0.18462	0.18462	0.18462
	0.86364	0.86364	0.13636	0.13636	0.06364	0.03636
	0.36508	0.36508	0.36508	0.36508	0.06667	0.06667
	0	0	0	0	0	0
	0	0	0	0	0	0
	0.21212	0.21212	0.21212	0.21212	0.21212	0.21212
	0.17647	0.17647	0.17647	0.17647	0.15686	0.02353
	0.83333	0.83333	0.83333	0.83333	0.41667	0.35
	1.03704	1.03704	1.03704	0.53704	0.37037	0.37037
	0	0	0	0	0	0
	0	0	0	0	0	0
	0.88235	0.88235	0.26471	0.21569	0.08235	0.16471
	0	0	0	0	0	0
	0.04225	0.04225	0.04225	0.04225	0.04225	0.04225
	0	0	0	0	0	0
	0.16667	0.16667	0.16667	0.16667	0.16667	0.16667
	0	0	0	0	0	0
	1.19718	1.19718	0.3662	0.13615	0.1662	0.2662
	0.48611	0.48611	0.48611	0.18056	0.08611	0.08611
	0.49123	0.49123	0.49123	0.49123	0.15789	0.16886
	0.01449	0.01449	0.01449	0.01449	0.01449	0.01449
	1.92857	1.92857	1.92857	0.07143	0.2619	0.07143
	0	0	0	0	0	0
	0	0	0	0	0	0
	0	0	0	0	0	0
	1.45588	1.45588	0.66176	0.66176	0.46176	0.06176
	0.60526	0.60526	0.60526	0.21053	0.27193	0.03383
	0.4	0.4	0.4	0.1	0.06667	0.15
	0.15789	0.15789	0.15789	0.15789	0.15789	0.01504
	0	0	0	0	0	0
	0	0	0	0	0	0
	0	0	0	0	0	0
	0	0	0	0	0	0
	0.48148	0.48148	0.48148	0.48148	0.01852	0.11852
	0.58824	0.58824	0.58824	0.2549	0.01176	0.08824
	0.71642	1.29851	0.71642	0.38308	0.30149	0.38308
	0.68254	0.68254	0.31746	0.31746	0.06746	0.12698
	1.61538	1.61538	0.38462	0.11538	0.28205	0.11538
	0.90625	0.90625	0.09375	0.09375	0.09375	0.09375
	1.87692	1.12308	0.12308	0.12308	0.12308	0.12308
	0	0	0	0	0	0
	0.44615	0.44615	0.55385	0.11282	0.15385	0.1094
	0	0	0	0	0	0
	0.12903	0.12903	0.12903	0.37097	0.37097	0.12097
	1.23529	1.23529	0.35294	0.26471	0.43137	0.16471
	0.52	0.52	0.52	0.52	0.06	0.24
	2.21429	2.21429	2.21429	0.35714	0.45238	0.21429
	0	0	0	0	0	0
	0	0	0	0	0	0
	0.0597	0.0597	0.0597	0.0597	0.0597	0.0597
	0.80882	0.80882	0.19118	0.19118	0.19118	0.19118
	0	0	0	0	0	0
	0	0	0	0	0	0
	0.0303	0.0303	0.0303	0.0303	0.0303	0.0303
	0.14286	0.14286	0.14286	0.14286	0.14286	0.14286
	0.95714	0.95714	0.04286	0.04286	0.04286	0.05714
	1	0.11268	0.11268	0.11268	0.11268	0.2
	0	0	0	0	0	0
	0.39706	0.39706	0.60294	0.06373	0.20294	0.00294
	1	1	1	0	0	0
	0	0	0	0	0	0
	0	0	0	0	0	0
	1.45588	1.45588	0.66176	0.66176	0.46176	0.06176
	0	0	0	0	0	0
	0.42105	0.42105	0.42105	0.42105	0.42105	0.2782
	0.32	0.32	0.32	0.32	0.32	0.32
	0	0	0	0	0	0
	0	0	0	0	0	0
	0	0	0	0	0	0
	0	0	0	0	0	0
	0.66667	0.16667	0.16667	0.33333	0.33333	0.33333
	0	0	0	0	0	0
	0.02703	0.02703	0.02703	0.02703	0.02703	0.02703
	0	0.16667	0.16667	0	0	0
	1.67647	1.67647	1.67647	0.32353	0.32353	0.18627
	0.54286	0.54286	0.54286	0.54286	0.54286	0.20952
	1.91667	0.77222	0.77222	0.08333	0.08333	0.08333
	0.91176	0.41176	0.41176	0.08824	0.2451	0.05462
	0.64706	0.31373	0.31373	0.35294	0.35294	0.06723
	0	0	0	0	0	0
	0	0	0	0	0	0
	0.5	0.5	0.5	0.5	0.5	0.3
	0.2	0.2	0.2	0.2	0.2	0.2
	1.92	1	1	0.08	0.08	0.32
	0.89286	0.89286	0.89286	0.10714	0.22619	0.05952
	0	0	0	0	0	0
	0	0	0	0	0	0
	1.88571	0.69286	0.69286	0.11429	0.11429	0.11429
	1	0	0	0	0	0
	0.07895	0.42105	0.42105	0.07895	0.07895	0.07895
	0	0	0	0	0	0
	0.54054	0.45946	0.45946	0.04054	0.20721	0.11197
	0	0	0	0	0	0
	0	0	0	0	0	0
	0.05128	0.11538	0.11538	0.05128	0.05128	0.05128
	0	0	0	0	0	0
	0	0	0	0	0	0
	1.80645	1.80645	1.80645	0.80645	0.30645	0.02688
	0.07692	0.07692	0.07692	0.07692	0.07692	0.07692
	0	0	0	0	0	0
	0.60526	0.60526	0.60526	0.21053	0.27193	0.03383
	0.42105	0.42105	0.42105	0.42105	0.42105	0.2782
	0	0	0	0	0	0
	1.15385	0.98462	0.98462	0.38462	0.38462	0.13187
	1	0.23333	0.23333	0.66667	0.83333	0.16667
	0.5	0.25	0.25	0	0.16667	0.07143
	0	0	0	0	0	0
	0.2	0.2	0.2	0.8	0.3	0.3
	0	0	0	0	0	0
	1	0.16667	0.16667	0	0	0
	0	0	0	0	0	0
	0.04255	0.04255	0.04255	0.04255	0.04255	0.04255
	0.65217	0.65217	0.65217	0.34783	0.34783	0.08075
	0.47826	0.47826	0.47826	0.47826	0.47826	0.04969
	0.84783	0.34783	0.34783	0.15217	0.15217	0.15217
	1.86957	1.06957	1.06957	0.13043	0.2029	0.00543
	0	0	0	0	0	0
	0.14894	0.13678	0.13678	0.14894	0.14894	0.00608
	0.25	0.25	0.25	0.25	0.41667	0.08333
	0	0	0	0	0	0
	1.25	0.25	0.25	0.25	0.25	0.25
	0.84	0.84	0.84	0.16	0.16	0.24
	0.89286	0.89286	0.89286	0.10714	0.22619	0.05952
	0.25532	0.25532	0.25532	0.24468	0.41135	0.24468
	0.2	0.8	0.8	0.3	0.46667	0.175
	0.97872	0.02128	0.02128	0.02128	0.02128	0.02128
	1.97917	0.69345	0.69345	0.02083	0.02083	0.02083
	0	0	0	0	0	0
	0.93878	0.08163	0.08163	0.06122	0.27211	0.06378
	0	0	0	0	0	0
	0.88889	0.11111	0.11111	0.11111	0.11111	0.01389
	0	0	0	0	0	0
	0.03922	0.03922	0.03922	0.03922	0.03922	0.03922
	0	0	0	0	0	0
	1	0	0	0	0	0
	1	1	1	0	0	0
	0	0	0	0	0	0
	0.1	0.1	0.1	0.1	0.23333	0.18571
	0.4	0.4	0.4	0.1	0.06667	0.15
	0.32	0.32	0.32	0.32	0.32	0.32
	0.84615	0.98462	0.98462	0.38462	0.38462	0.13187
	0	0	0	0	0	0
	0.66667	0.66667	0.66667	0.33333	0.33333	0.19048
	1.15385	0.47692	0.47692	0.15385	0.17949	0.27473
	1	1	1	1	1	1
	1	1	1	0	0	0
	1.45	0.85	0.85	0.55	0.55	0.45
	0.81818	1.06818	1.06818	0.18182	0.31818	0.01818
	0.44444	0.44444	0.44444	0.27778	0.11111	0.12698
	0.39474	0.39474	0.39474	0.10526	0.0614	0.03383
	0.09091	0.09091	0.09091	0.09091	0.09091	0.09091
	0.08571	0.08571	0.08571	0.08571	0.08571	0.08571
	0.22222	0.22222	0.22222	0.22222	0.22222	0.22222
	0.2	0.53333	0.53333	0.2	0.2	0.05714
	1.15152	0.65152	0.65152	0.84848	0.51515	0.12121
	0.73529	0.90196	0.90196	0.26471	0.06863	0.23529
	0	1	1	0	0	0
	0.15	0.51667	0.51667	0.15	0.15	0.15
	0	0	0	0	0	0
	0.31818	0.31818	0.31818	0.31818	0.31818	0.08182
	0	0	0	0	0	0
	1	1	1	0	0	0
	1	1.5	1.5	0	0	0
	0.45714	1.08571	1.08571	0.21429	0.12381	0.17143
	0.51429	0.68095	0.68095	0.51429	0.51429	0.08571
	1.92105	0.42105	0.42105	0.07895	0.07895	0.07895
	1	0.5	0.5	0	0	0
	1.47222	0.99444	0.99444	0.52778	0.19444	0.18651
	0.80645	0.80645	0.80645	0.19355	0.13978	0.09217
	0	0	0	0	0	0
	0	0	0	0	0	0
	0	0.16667	0.16667	0	0	0
	0.07692	0.24359	0.24359	0.07692	0.07692	0.06593
	1.82353	1.82353	1.82353	0.17647	0.17647	0.16667
	0	0	0	0	0	0
	0	0	0	0	0	0
	0.15789	0.15789	0.15789	0.15789	0.15789	0.01504
	0	0	0	0	0	0
	1	0.23333	0.23333	0.66667	0.83333	0.16667
	0.66667	0.66667	0.66667	0.33333	0.33333	0.19048
	0	0	0	0	0	0
	0.83333	1.16667	1.16667	0.66667	0.5	0.04762
	1	1	1	1	1	1
	1.33333	1.33333	1.33333	0.66667	0.16667	0.16667
	0.68421	0.68421	0.68421	0.31579	0.31579	0.18421
	1.68182	1.01515	1.01515	0.31818	0.45455	0.08182
	0.20513	0.37179	0.37179	0.29487	0.12821	0.06227
	0.21951	0.21951	0.21951	0.28049	0.11382	0.07666
	0.08333	0.08333	0.08333	0.08333	0.08333	0.08333
	0.13158	0.13158	0.13158	0.13158	0.13158	0.13158
	0.12821	0.37821	0.37821	0.12821	0.12821	0.12821
	0.13514	0.63514	0.63514	0.13514	0.13514	0.13514
	0.30556	0.30556	0.30556	0.69444	0.36111	0.01984
	0.67568	0.92278	0.92278	0.64865	0.31532	0.01802
	0.34615	0.34615	0.34615	0.38462	0.55128	0.21795
	0	0	0	0	0	0
	1	0.33333	0.33333	0	0	0
	0.12	0.12	0.12	0.12	0.12	0.12
	0	0	0	0	0	0
	1.24324	1.24324	1.24324	0.25676	0.42342	0.32819
	1.15385	0.84615	0.84615	0.34615	0.51282	0.27473
	0.21053	0.21053	0.21053	0.21053	0.21053	0.06767
	0.52632	1.09774	1.09774	0.52632	0.52632	0.04511
	1	0.42857	0.42857	0	0	0
	1.92857	0.5	0.5	0.42857	0.2619	0.07143
	0.5641	0.5641	0.5641	0.4359	0.4359	0.29304
	1.37143	0.82857	0.82857	0.67143	0.17143	0.22857
	0.14634	0.14634	0.14634	0.14634	0.14634	0.14634
	0.07143	0.07143	0.07143	0.07143	0.07143	0.07143
	0	0.16667	0.16667	0	0	0
	1	0	0	0	0	0
	0.81818	0.81818	0.81818	0.18182	0.18182	0.01515
	0	0	0	0	0	0
	0.19048	0.19048	0.19048	0.30952	0.47619	0.2381
	0	0	0	0	0	0
	0	0	0	0	0	0
	0.5	0.25	0.25	0	0.16667	0.07143
	1.15385	0.47692	0.47692	0.15385	0.17949	0.27473
	1.16667	1.16667	1.16667	0.66667	0.5	0.04762
	0	0	0	0	0	0
mean	0.460515	0.425548	0.368816	0.211731	0.169298	0.115287
stdev	0.522667	0.475386	0.448923	0.293785	0.266034	0.318895
count	1443	1443	1444	1444	1444	1444
SEM	0.0137592	0.0125145	0.0118138	0.00773118	0.00700088	0.00839197
df	1442	1442	1443	1443	1443	1443
theoretixcal mean	0	0	0	0	0	0
t	33.4697	34.0045	31.2192	27.3867	24.1824	13.7378
p	1.59331e-182	6.5972e-187	3.2521e-164	1.26056e-133	4.83434e-109	9.39508e-41
	****	****	****	****	****	****
	O to N	N to 1	1 to 3	3 to 5	5 to 10
paired t test	0.0602108	0.000990735	4.26372e-28	4.86176e-05	8.18419e-07
	ns	***	****	****	****
