# Supplementary material for: Automated cell annotation in multi-cell images using an improved CRF_ID algorithm
Source: eLife. 2025 Jan 24;12:RP89050. doi: 10.7554/eLife.89050 (PMC11759411; doi:10.7554/eLife.89050)
Supplement: Figure 4—source data 1. [file elife-89050-fig4-data1.xlsx]

## Sheet: Sheet1
Figure 4- source data for 4a
	Automatic Neuron ID					Manual Neuron ID
	Top 1	Top 2	Top 3	BSP		Human 1	Human 2	Human 3
1	0.68	0.88	0.92	0.72		0.8	0.633333	0.733333
2	0.8	0.9	0.933333	0.9		0.818182	0.727273	0.939394
3	0.708333	0.958333	1	0.75		0.84	0.72	0.92
4	0.944444	0.944444	0.944444	0.944444		0.947368	1	1
5	0.757576	0.757576	0.757576	0.818182		0.789474	1	1
6	0.678571	0.892857	0.964286	0.821429		0.793103	0.965517	0.931034
7	0.655172	0.793103	0.931034	0.62069		0.818182	0.909091	0.939394
8	0.724138	0.896552	0.896552	0.793103		0.896552	1	0.862069
9	0.821429	1	1	0.857143		0.806452	0.903226	1
10	0.939394	0.969697	0.969697	0.969697		0.885714	0.857143	1
11	0.741935	0.741935	0.741935	0.83871		0.861111	0.944444	0.972222
12	0.72	0.92	0.96	0.88		0.923077	1	1
13	0.68	0.88	0.92	0.72		0.851852	1	1
14	0.814815	1	1	0.851852		0.962963	1	1
15	0.64	0.8	0.88	0.72		0.88	0.92	1
16	0.954545	1	1	1		0.88	0.88	0.92
17	0.903226	0.967742	0.967742	0.870968		0.909091	0.939394	1
18	0.73913	0.913043	1	0.956522		0.84	1	1
19	0.958333	1	1	0.958333		0.88	1	1
20	0.941176	0.970588	0.970588	0.941176		0.885714	1	1
21	0.807692	0.961538	1	0.884615		0.961538	1	0.923077
23	0.73913	0.913043	1	0.913043		0.958333	0.875	0.916667
25	0.791667	0.875	0.958333	0.791667		0.958333	0.875	1
26	0.64	0.88	0.88	0.72		0.703704	1	1
27	0.962963	1	1	0.962963		0.870968	1	1
28	0.967742	1	1	0.967742		1	0.806452	0.935484
