# Supplementary material for: Automated cell annotation in multi-cell images using an improved CRF_ID algorithm
Source: eLife. 2025 Jan 24;12:RP89050. doi: 10.7554/eLife.89050 (PMC11759411; doi:10.7554/eLife.89050)
Supplement: Figure 4—source data 2. [file elife-89050-fig4-data2.xlsx]

## Sheet: Sheet1
Figure 4- source data for 4b
Training data		Human 1+2+3		Human 1		Human 2		Human 3
1		0.72		0.72		0.76		0.72
2		0.9		0.9		0.866667		0.866667
3		0.75		0.708333		0.833333		0.833333
4		0.944444		0.944444		0.916667		0.944444
5		0.818182		0.878788		0.666667		0.878788
6		0.821429		0.892857		0.785714		0.821429
7		0.62069		0.62069		0.689655		0.586207
8		0.793103		0.793103		0.689655		0.758621
9		0.857143		0.857143		0.857143		0.857143
10		0.969697		0.969697		0.969697		1
11		0.83871		0.903226		0.774194		0.774194
12		0.88		0.88		0.92		0.92
13		0.72		0.76		0.72		0.72
14		0.851852		0.851852		0.888889		0.888889
15		0.72		0.8		0.76		0.76
16		1		1		1		1
17		0.870968		0.903226		0.935484		0.870968
18		0.956522		1		0.826087		1
19		0.958333		1		0.75		0.958333
20		0.941176		0.911765		0.941176		0.911765
21		0.884615		0.884615		0.807692		0.769231
22		0.913043		0.913043		0.826087		0.869565
23		0.791667		0.75		0.791667		0.791667
24		0.72		0.72		0.72		0.72
25		0.962963		0.962963		1		1
26		0.967742		0.967742		0.870968		0.870968
