# Supplementary material for: Automated cell annotation in multi-cell images using an improved CRF_ID algorithm
Source: eLife. 2025 Jan 24;12:RP89050. doi: 10.7554/eLife.89050 (PMC11759411; doi:10.7554/eLife.89050)
Supplement: Figure 4—source data 3. [file elife-89050-fig4-data3.xlsx]

## Sheet: Sheet1
Figure 4- source data for 4c
Neuron	Manual neuron ID	Automatic neuron ID
AIBR	0.848485	0.363636
AIBL	0.962963	1
AVAR	0.946667	0.84
AVAL	0.96	0.92
eta-R	0.927536	0.73913
eta-L	0.847222	0.458333
AVDR	0.904762	0.809524
AVDL	0.857143	0.666667
AVER	0.869565	0.869565
AVEL	0.924242	0.727273
AVG	0.969697	0.818182
alpha-R	0.777778	0.444444
beta	0.8	0.846154
RIAR	0.925926	1
RIAL	0.966667	0.9
RIGL	0.985507	0.869565
RIGR	1	0.916667
RIMR	0.944444	0.833333
RIML	0.916667	0.791667
RMDDR	0.986667	0.88
RMDDL	0.986111	0.958333
RMDR	0.909091	0.909091
RMDL	0.909091	0.863636
RMDVR	0.987179	0.807692
RMDVL	0.987179	0.923077
RMER	1	0.9
RMEL	1	0.958333
gamma	1	0.933333
SMDDR	0.987179	0.961538
SMDDL	0.973333	0.96
SMDVR	0.986667	0.88
SMDVL	1	0.916667
delta-R	1	1
delta-L	1	1
epsilon-R	1	0.928571
epsilon-L	1	1
