# Supplementary material for: Automated cell annotation in multi-cell images using an improved CRF_ID algorithm
Source: eLife. 2025 Jan 24;12:RP89050. doi: 10.7554/eLife.89050 (PMC11759411; doi:10.7554/eLife.89050)
Supplement: Figure 5—source data 1. [file elife-89050-fig5-data1.xlsx]

## Sheet: Sheet1
Figure 5- source data for 5b
RFP intensity	neuron
0.991221	AVA
0.642748	AVA
1.22437	AVA
1.19718	AVA
1.26982	AVA
1.11339	AVA
1.50562	AVA
2.55472	AVA
1.51963	AVA
0.811473	AVA
0.537283	AVA
1.25474	AVA
0.782992	AVA
1.14768	AVA
1.40088	AVA
1.16203	AVA
1.53507	AVA
1.60288	AVA
1.65925	AVA
1.59948	AVA
1.76887	AVA
2.51746	RMDV
1.78655	RMDV
1.80237	RMDV
3.01217	RMDV
2.35643	RMDV
2.5866	RMDV
2.39191	RMDV
2.04405	RMDV
1.08004	RMDV
2.87611	RMDV
3.01977	RMDV
2.10814	RMDV
1.92786	RMDV
1.17792	RMDV
2.42055	RMDV
1.47971	RMDV
1.68566	RMDV
1.53213	RMDV
1.93717	RMDV
1.70121	RMDV
1.66951	RMDV
1.65128	RMDV
1.54083	RMDV
2.44673	RMDV
1.28881	AVE
1.23446	AVE
1.62806	AVE
1.82981	AVE
2.30083	AVE
1.53157	AVE
1.48221	AVE
1.6046	AVE
0.891747	AVE
1.13535	AVE
1.49194	AVE
1.39503	AVE
1.56715	AVE
0.699686	AVE
1.55015	AVE
1.5729	AVE
1.77087	AVE
1.85373	AVE
1.46685	AVE
0.352894	AVE
1.06385	AVE
1.06985	AVE
0.923331	RMDD
2.36662	RMDD
1.60754	RMDD
2.72659	RMDD
0.463993	RMDD
2.27976	RMDD
2.3471	RMDD
2.83238	RMDD
1.40368	RMDD
2.35547	RMDD
0.89831	RMDD
2.45645	RMDD
1.26315	RMDD
1.56991	RMDD
1.35394	RMDD
0.889689	RMDD
0.65832	RMDD
1.44734	RMDD
1.472	RMDD
0.934111	RMDD
1.19621	RMDD
1.64176	RMD
1.80453	RMD
1.67419	RMD
2.08558	RMD
1.69601	RMD
1.7416	RMD
1.84089	RMD
3.42499	RMD
2.43752	RMD
1.51975	RMD
2.0264	RMD
1.19603	RMD
1.85788	RMD
0.709169	RMD
1.86962	RMD
1.57524	RMD
1.43394	RMD
1.66306	RMD
1.95191	RMD
1.76012	RMD
1.55372	RMD
2.49115	RMD
1.12374	AVD
1.22486	AVD
1.67198	AVD
2.35708	AVD
1.67716	AVD
1.50338	AVD
0.903576	AVD
0.644316	AVD
1.80949	AVD
1.70648	AVD
2.0141	AVD
0.33246	AVD
1.62696	AVD
2.01469	AVD
1.36562	AVD
1.4182	AVD
1.37114	AVD
1.46653	AVD
1.73189	AVD
1.46812	AVD
1.50281	AVD
0.806398	AVD
0.769734	RIM
0.711399	RIM
1.17534	RIM
2.00727	RIM
1.15127	RIM
1.2484	RIM
1.52467	RIM
1.379	RIM
1.18518	RIM
0.930961	RIM
1.6171	RIM
2.48515	RIM
0.63783	RIM
1.23909	RIM
1.13561	RIM
1.6462	RIM
1.56019	RIM
1.54764	RIM
1.29525	RIM
2.03142	RIM
2.51802	SMDV
1.01328	SMDV
2.36833	SMDV
1.667	SMDV
1.23833	SMDV
1.19036	SMDV
1.84007	SMDV
3.65127	SMDV
1.92555	SMDV
1.8671	SMDV
1.38797	SMDV
2.90514	SMDV
1.55974	SMDV
3.10435	SMDV
2.54292	SMDV
1.1197	SMDV
1.55175	SMDV
1.51535	SMDV
1.94372	SMDV
1.58588	SMDV
1.55783	SMDV
1.55722	SMDV
1.55884	SMDV
1.88936	SMDV
0.696881	SMDD
3.60731	SMDD
0.610209	SMDD
1.24546	SMDD
2.29047	SMDD
0.773397	SMDD
2.52525	SMDD
2.67724	SMDD
2.38083	SMDD
2.24215	SMDD
1.49057	SMDD
2.64576	SMDD
2.99644	SMDD
0.956018	SMDD
1.00162	SMDD
1.35269	SMDD
1.29765	SMDD
1.46403	SMDD
0.93345	SMDD
1.01931	SMDD
1.46324	SMDD
1.47699	SMDD
1.30994	SMDD
1.22849	RIA
0.395439	RIA
0.978694	RIA
0.985951	RIA
1.23858	RIA
1.15213	RIA
1.06924	RIA
1.0225	RIA
0.853077	RIA
1.35068	RIA
0.582361	RIA
1.32998	RIA
0.749733	RIA
0.429562	RIA
1.37681	delta
1.92049	delta
1.48864	delta
1.38408	delta
1.33038	delta
1.5601	delta
1.27299	delta
1.52748	delta
0.67224	epsilon
0.572962	epsilon
2.06455	epsilon
1.44317	epsilon
0.833008	epsilon
1.53074	epsilon
0.765965	epsilon
1.69819	epsilon
1.51324	RME
1.2763	RME
1.36666	RME
1.02966	RME
1.71378	RME
1.70288	RME
0.676319	RME
1.49396	RME
2.1885	RME
0.532847	RME
0.84691	RME
1.27981	RME
0.377863	RME
0.987403	RME
0.958803	RME
1.26627	RME
0.5461	RME
0.530483	RME
0.362023	AIB
0.437524	AIB
0.410762	AIB
0.552178	AIB
0.965162	AIB
1.18199	AIB
0.663564	AIB
0.424844	AIB
0.918471	AIB
0.610106	AIB
1.84721	eta
0.712714	eta
2.4207	eta
2.49489	eta
1.56505	eta
2.15001	eta
1.92663	eta
1.35385	eta
1.12207	eta
1.5125	eta
2.19071	eta
1.29844	eta
4.29253	eta
1.34758	eta
1.92305	eta
0.844794	eta
0.722717	eta
1.6561	eta
1.82433	eta
1.28707	eta
1.49591	eta
1.61963	eta
2.23821	eta
