# Supplementary material for: Automated cell annotation in multi-cell images using an improved CRF_ID algorithm
Source: eLife. 2025 Jan 24;12:RP89050. doi: 10.7554/eLife.89050 (PMC11759411; doi:10.7554/eLife.89050)
Supplement: Figure 5—source data 2. [file elife-89050-fig5-data2.xlsx]

## Sheet: Sheet1
Figure 5- source data for 5c
GFP	neuron
0.834743	AVA
0.526636	AVA
0.303831	AVA
1.66915	AVA
1.23173	AVA
1.86736	AVA
1.11056	AVA
1.50116	AVA
1.19312	AVA
0.197652	AVA
0.198527	AVA
1.758	AVA
1.10681	AVA
0.908319	AVA
1.26118	AVA
0.908629	AVA
1.33279	AVA
1.95112	AVA
0.782049	AVA
1.66903	AVA
1.43311	AVA
1.14839	RMDV
2.00557	RMDV
0.754913	RMDV
2.08884	RMDV
1.05296	RMDV
1.2027	RMDV
2.22018	RMDV
2.71022	RMDV
0.716992	RMDV
2.32582	RMDV
1.89607	RMDV
0.676673	RMDV
0.890714	RMDV
1.02819	RMDV
1.89392	RMDV
1.66928	RMDV
1.39274	RMDV
1.4847	RMDV
1.58983	RMDV
1.44765	RMDV
2.08034	RMDV
0.952666	RMDV
1.74355	RMDV
1.78096	RMDV
1.05892	AVE
0.233761	AVE
1.57437	AVE
0.405811	AVE
0.653395	AVE
1.77248	AVE
0.400242	AVE
0.996775	AVE
0.698291	AVE
0.617645	AVE
1.61198	AVE
0.693767	AVE
0.457733	AVE
0.395762	AVE
1.03254	AVE
1.26105	AVE
1.13528	AVE
1.00417	AVE
1.34208	AVE
0.150115	AVE
0.152375	AVE
0.941893	AVE
0.607739	RMDD
0.905298	RMDD
1.34678	RMDD
1.60566	RMDD
0.518508	RMDD
0.556219	RMDD
0.587461	RMDD
1.76751	RMDD
0.602374	RMDD
0.930747	RMDD
0.566877	RMDD
1.23487	RMDD
1.44345	RMDD
1.09166	RMDD
0.382061	RMDD
0.442984	RMDD
0.560347	RMDD
1.03103	RMDD
0.735673	RMDD
0.538376	RMDD
0.259677	RMDD
1.77447	RMD
0.5962	RMD
0.885552	RMD
1.10045	RMD
1.92606	RMD
0.119912	RMD
0.18546	RMD
1.03123	RMD
1.28956	RMD
1.58809	RMD
1.08093	RMD
0.739442	RMD
2.69174	RMD
0.553871	RMD
1.63509	RMD
1.45831	RMD
1.18385	RMD
1.08903	RMD
1.28729	RMD
1.61545	RMD
1.16177	RMD
1.21952	RMD
0.643863	AVD
0.118314	AVD
1.50193	AVD
1.0565	AVD
0.627765	AVD
1.13082	AVD
0.245144	AVD
0.34316	AVD
2.42408	AVD
1.18169	AVD
0.776811	AVD
0.768392	AVD
0.693816	AVD
1.91471	AVD
0.88791	AVD
1.30537	AVD
0.873566	AVD
0.923712	AVD
1.14622	AVD
0.975321	AVD
0.364032	AVD
0.329827	AVD
0.613966	RIM
0.103613	RIM
0.818897	RIM
0.691231	RIM
0.296975	RIM
0.331162	RIM
0.492384	RIM
1.11158	RIM
0.300345	RIM
0.699605	RIM
1.73585	RIM
0.988137	RIM
0.545994	RIM
0.392812	RIM
0.73258	RIM
0.309696	RIM
0.343134	RIM
1.29184	RIM
0.683742	RIM
0.296905	RIM
1.86884	SMDV
0.69174	SMDV
2.81453	SMDV
2.01918	SMDV
1.04748	SMDV
1.26667	SMDV
2.28822	SMDV
2.00154	SMDV
0.479561	SMDV
2.44822	SMDV
0.998799	SMDV
3.05049	SMDV
0.888999	SMDV
1.97848	SMDV
1.57313	SMDV
1.47914	SMDV
1.04713	SMDV
0.596543	SMDV
0.84338	SMDV
1.27696	SMDV
0.919897	SMDV
1.54082	SMDV
1.22707	SMDV
0.658207	SMDV
0.584811	SMDD
1.30922	SMDD
0.788248	SMDD
0.588908	SMDD
1.31609	SMDD
0.632536	SMDD
2.21381	SMDD
2.59972	SMDD
1.51593	SMDD
2.57156	SMDD
1.07219	SMDD
1.53186	SMDD
2.56688	SMDD
1.09255	SMDD
1.06758	SMDD
1.61648	SMDD
1.63803	SMDD
0.823852	SMDD
0.107429	SMDD
0.4713	SMDD
1.30292	SMDD
1.67193	SMDD
1.10482	SMDD
1.58411	RIA
0.193555	RIA
0.254205	RIA
1.25397	RIA
1.16065	RIA
1.49573	RIA
1.09941	RIA
0.914569	RIA
0.643741	RIA
0.920339	RIA
0.666132	RIA
0.557992	RIA
0.862958	RIA
0.475047	RIA
0.593533	delta
0.188272	delta
1.10553	delta
0.861784	delta
0.943396	delta
0.306688	delta
0.147267	delta
0.141876	delta
0.951123	epsilon
0.826086	epsilon
0.574725	epsilon
1.08344	epsilon
0.674294	epsilon
0.249236	epsilon
1.04245	epsilon
1.50266	epsilon
1.85826	RME
1.37828	RME
1.9764	RME
0.372777	RME
1.39045	RME
1.59072	RME
0.578128	RME
0.687711	RME
0.9326	RME
0.812332	RME
0.868756	RME
0.642057	RME
0.2236	RME
0.545824	RME
0.706824	RME
0.806631	RME
0.509795	RME
0.403708	RME
0.314856	AIB
0.318276	AIB
0.120337	AIB
0.552641	AIB
0.477584	AIB
0.319285	AIB
0.101322	AIB
0.12101	AIB
0.149644	AIB
0.212401	AIB
1.40594	eta
0.223747	eta
1.61561	eta
1.83529	eta
0.834516	eta
1.00082	eta
0.882328	eta
0.822427	eta
0.85882	eta
2.2228	eta
1.22449	eta
1.1326	eta
1.71264	eta
0.934442	eta
1.22884	eta
1.10719	eta
0.613505	eta
1.45005	eta
0.855433	eta
0.994328	eta
1.21901	eta
1.36342	eta
1.6229	eta
